# Supplementary material for: A study of cation-dependent inverse hydrogen bonds and magnetic exchange-couplings in lanthanacarborane complexes
Source: PubMed Central journal article supplement — iScience. 2021 Jun 19;24(7):102760. doi: 10.1016/j.isci.2021.102760 (PMC8271178; doi:10.1016/j.isci.2021.102760), 2021-06-19
Supplement: mmc1.pdf [file mmc1.pdf]

**iScience, Volume 24**

**Supplemental information**

**A study of cation-dependent inverse  
hydrogen bonds and magnetic exchange-couplings  
in lanthanacarborane complexes**

**Peng-Bo Jin, Qian-Cheng Luo, Yuan-Qi Zhai, Yi-Dian Wang, Yan Ma, Lei Tian, Xinliang Zhang, Chao Ke, Xu-Feng Zhang, Yi Lv, and Yan-Zhen Zheng**

**Table S1 Crystallographic data for complexes 1Dy, 2Dy, 2Y, 3Dy, 4Dy, 5Dy, 5Y, 6Dy and 6Y.**  
Related to Figure 1.

| Compound                                      | 1Dy                                                                               | 2Dy                                                                                               | 2Y                                                                                               | 3Dy                                                                               | 4Dy                                                                                               |
|-----------------------------------------------|-----------------------------------------------------------------------------------|---------------------------------------------------------------------------------------------------|--------------------------------------------------------------------------------------------------|-----------------------------------------------------------------------------------|---------------------------------------------------------------------------------------------------|
| Formula                                       | C <sub>37</sub> H <sub>63</sub> B <sub>9</sub> DyN <sub>3</sub><br>O <sub>2</sub> | C <sub>66</sub> H <sub>110</sub> B <sub>18</sub> Dy <sub>2</sub> N <sub>6</sub><br>O <sub>2</sub> | C <sub>66</sub> H <sub>110</sub> B <sub>18</sub> N <sub>6</sub> O <sub>2</sub><br>Y <sub>2</sub> | C <sub>45</sub> H <sub>69</sub> B <sub>9</sub> DyN <sub>3</sub><br>O <sub>2</sub> | C <sub>82</sub> H <sub>122</sub> B <sub>18</sub> Dy <sub>2</sub><br>N <sub>6</sub> O <sub>2</sub> |
| <i>M</i> , g mol <sup>-1</sup>                | 841.69                                                                            | 1539.17                                                                                           | 1391.99                                                                                          | 943.82                                                                            | 1743.43                                                                                           |
| Temperature, K                                | 150(2)                                                                            | 150(2)                                                                                            | 150(2)                                                                                           | 150(2)                                                                            | 150(2)                                                                                            |
| Space group                                   | <i>P</i> 2 <sub>1</sub> / <i>c</i>                                                | <i>P</i> 2 <sub>1</sub> / <i>n</i>                                                                | <i>P</i> 2 <sub>1</sub> / <i>n</i>                                                               | <i>P</i> 2 <sub>1</sub> / <i>c</i>                                                | <i>P</i> -1                                                                                       |
| <i>a</i> , Å                                  | 10.7984(19)                                                                       | 13.366(5)                                                                                         | 13.381(5)                                                                                        | 17.668(3)                                                                         | 12.1280(14)                                                                                       |
| <i>b</i> , Å                                  | 17.615(3)                                                                         | 14.274(5)                                                                                         | 14.238(5)                                                                                        | 10.9187(18)                                                                       | 14.0662(16)                                                                                       |
| <i>c</i> , Å                                  | 22.557(4)                                                                         | 20.527(8)                                                                                         | 20.345(7)                                                                                        | 24.013(4)                                                                         | 15.8091(18)                                                                                       |
| <i>α</i> , deg                                | 90                                                                                | 90                                                                                                | 90                                                                                               | 90                                                                                | 85.535(2)                                                                                         |
| <i>β</i> , deg                                | 99.741(2)                                                                         | 96.831(5)                                                                                         | 97.199(5)                                                                                        | 94.488(2)                                                                         | 88.410(2)                                                                                         |
| <i>γ</i> , deg                                | 90                                                                                | 90                                                                                                | 90                                                                                               | 90                                                                                | 66.3980(10)                                                                                       |
| <i>V</i> , Å <sup>3</sup>                     | 4228.8(13)                                                                        | 3888(3)                                                                                           | 3846(2)                                                                                          | 4618.2(13)                                                                        | 2463.8(5)                                                                                         |
| <i>Z</i>                                      | 4                                                                                 | 2                                                                                                 | 2                                                                                                | 4                                                                                 | 1                                                                                                 |
| <i>d</i> <sub>cal</sub> , g cm <sup>-3</sup>  | 1.322                                                                             | 1.315                                                                                             | 1.202                                                                                            | 1.357                                                                             | 1.175                                                                                             |
| 2θ range, deg                                 | 2.95 to 52.548                                                                    | 3.458 to 53.268                                                                                   | 3.454 to 51                                                                                      | 3.402 to 55.298                                                                   | 3.168 to 55.5                                                                                     |
| <i>R</i> <sub>int</sub>                       | 0.0366                                                                            | 0.0347                                                                                            | 0.0644                                                                                           | 0.0286                                                                            | 0.0243                                                                                            |
| Final indices<br>[ <i>I</i> > 2σ( <i>I</i> )] | <i>R</i> <sub>1</sub> = 0.0351,<br><i>wR</i> <sub>2</sub> = 0.0780                | <i>R</i> <sub>1</sub> = 0.0355,<br><i>wR</i> <sub>2</sub> = 0.0875                                | <i>R</i> <sub>1</sub> = 0.0623,<br><i>wR</i> <sub>2</sub> = 0.1624                               | <i>R</i> <sub>1</sub> = 0.0346,<br><i>wR</i> <sub>2</sub> = 0.0823                | <i>R</i> <sub>1</sub> = 0.0293,<br><i>wR</i> <sub>2</sub> = 0.0705                                |
| <i>R</i> indices (all data)                   | <i>R</i> <sub>1</sub> = 0.0515,<br><i>wR</i> <sub>2</sub> = 0.0877                | <i>R</i> <sub>1</sub> = 0.0494,<br><i>wR</i> <sub>2</sub> = 0.0951                                | <i>R</i> <sub>1</sub> = 0.0912,<br><i>wR</i> <sub>2</sub> = 0.1803                               | <i>R</i> <sub>1</sub> = 0.0446,<br><i>wR</i> <sub>2</sub> = 0.0874                | <i>R</i> <sub>1</sub> = 0.0358,<br><i>wR</i> <sub>2</sub> = 0.0736                                |
| Goodness-of-fit on <i>F</i> <sup>2</sup>      | 1.134                                                                             | 1.054                                                                                             | 1.032                                                                                            | 1.147                                                                             | 1.059                                                                                             |
| Residual map, e Å <sup>-3</sup>               | 1.68/-0.78                                                                        | 1.46/-0.57                                                                                        | 1.92/-1.06                                                                                       | 1.91/-1.13                                                                        | 2.20/-0.63                                                                                        |

| <b>Compound</b>                               | <b>5Dy</b>                                                              | <b>5Y</b>                                                              | <b>6Dy</b>                                                                                                          | <b>6Y</b>                                                                                                          |
|-----------------------------------------------|-------------------------------------------------------------------------|------------------------------------------------------------------------|---------------------------------------------------------------------------------------------------------------------|--------------------------------------------------------------------------------------------------------------------|
| Formula                                       | C <sub>59</sub> H <sub>86</sub> B <sub>9</sub> ClDyNa<br>O <sub>6</sub> | C <sub>59</sub> H <sub>86</sub> B <sub>9</sub> ClYNa<br>O <sub>6</sub> | C <sub>102</sub> H <sub>140</sub> B <sub>18</sub> Cl <sub>2</sub><br>Dy <sub>2</sub> Na <sub>2</sub> O <sub>8</sub> | C <sub>102</sub> H <sub>140</sub> B <sub>18</sub> Cl <sub>2</sub><br>Na <sub>2</sub> O <sub>8</sub> Y <sub>2</sub> |
| <i>M</i> , g mol <sup>-1</sup>                | 1209.5                                                                  | 1135.91                                                                | 2130.59                                                                                                             | 1983.41                                                                                                            |
| Temperature,<br>K                             | 150(2)                                                                  | 150(2)                                                                 | 150(2)                                                                                                              | 150(2)                                                                                                             |
| Space group                                   | <i>P</i> -1                                                             | <i>P</i> -1                                                            | <i>P</i> -1                                                                                                         | <i>P</i> -1                                                                                                        |
| <i>a</i> , Å                                  | 10.906(8)                                                               | 10.800(3)                                                              | 12.028(13)                                                                                                          | 11.903(4)                                                                                                          |
| <i>b</i> , Å                                  | 12.748(10)                                                              | 12.656(4)                                                              | 13.414(14)                                                                                                          | 13.288(5)                                                                                                          |
| <i>c</i> , Å                                  | 22.995(17)                                                              | 22.867(7)                                                              | 18.360(19)                                                                                                          | 18.157(6)                                                                                                          |
| <i>α</i> , deg                                | 83.962(9)                                                               | 84.045(4)                                                              | 103.382(13)                                                                                                         | 103.693(4)                                                                                                         |
| <i>β</i> , deg                                | 81.446(9)                                                               | 81.609(4)                                                              | 105.519(13)                                                                                                         | 105.507(4)                                                                                                         |
| <i>γ</i> , deg                                | 83.577(9)                                                               | 83.531(4)                                                              | 92.387(13)                                                                                                          | 92.146(4)                                                                                                          |
| <i>V</i> , Å <sup>3</sup>                     | 3129(4)                                                                 | 3060.3(16)                                                             | 2760(5)                                                                                                             | 2673.0(16)                                                                                                         |
| <i>Z</i>                                      | 1                                                                       | 1                                                                      | 1                                                                                                                   | 1                                                                                                                  |
| <i>d</i> <sub>cal</sub> , g cm <sup>-3</sup>  | 1.284                                                                   | 1.233                                                                  | 1.282                                                                                                               | 1.232                                                                                                              |
| 2θ range, deg                                 | 3.228 to 55.554                                                         | 3.252 to 55.208                                                        | 2.378 to 51.432                                                                                                     | 3.174 to 47.234                                                                                                    |
| <i>R</i> <sub>int</sub>                       | 0.0366                                                                  | 0.0341                                                                 | 0.0555                                                                                                              | 0.0423                                                                                                             |
| Final indices<br>[ <i>I</i> > 2σ( <i>I</i> )] | <i>R</i> <sub>1</sub> = 0.0339,<br><i>wR</i> <sub>2</sub> = 0.0983      | <i>R</i> <sub>1</sub> = 0.0410,<br><i>wR</i> <sub>2</sub> = 0.0917     | <i>R</i> <sub>1</sub> = 0.0434,<br><i>wR</i> <sub>2</sub> = 0.1142                                                  | <i>R</i> <sub>1</sub> = 0.0492,<br><i>wR</i> <sub>2</sub> = 0.1263                                                 |
| <i>R</i> indices (all<br>data)                | <i>R</i> <sub>1</sub> = 0.0429,<br><i>wR</i> <sub>2</sub> = 0.1069      | <i>R</i> <sub>1</sub> = 0.0617,<br><i>wR</i> <sub>2</sub> = 0.0995     | <i>R</i> <sub>1</sub> = 0.0678,<br><i>wR</i> <sub>2</sub> = 0.1318                                                  | <i>R</i> <sub>1</sub> = 0.0799,<br><i>wR</i> <sub>2</sub> = 0.1414                                                 |
| Goodness-of-<br>fit on <i>F</i> <sup>2</sup>  | 0.800                                                                   | 1.016                                                                  | 0.833                                                                                                               | 1.106                                                                                                              |
| Residual<br>map, e Å <sup>-3</sup>            | 1.27/-0.64                                                              | 0.54/-0.34                                                             | 1.45/-0.86                                                                                                          | 0.73/-0.52                                                                                                         |

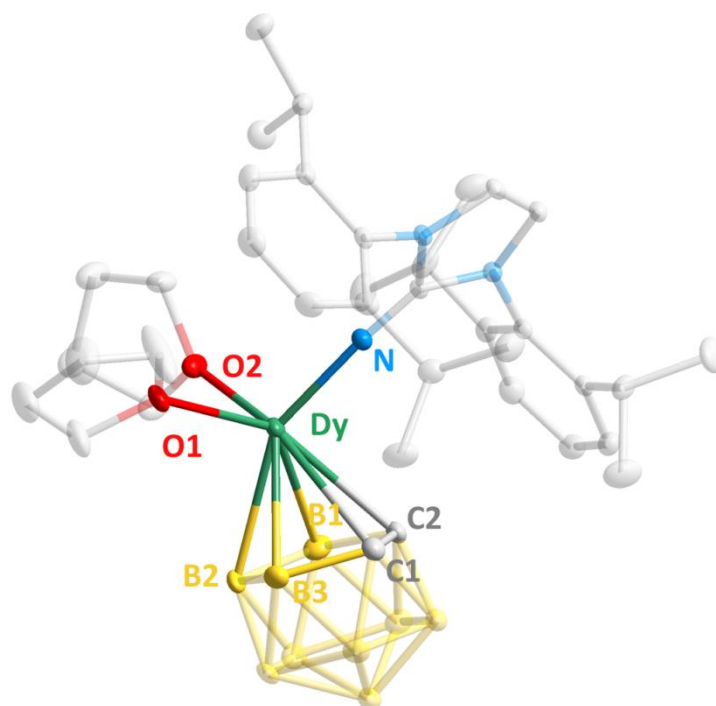

**Figure S1 Thermal ellipsoid (30% probability) representation of the simplified molecular structure of 1Dy.** All the hydrogen atoms are omitted for clarity. Related to Figure 1.

|                                               |          |
|-----------------------------------------------|----------|
| Dy-O1                                         | 2.362(3) |
| Dy-O2                                         | 2.353(3) |
| Dy-N                                          | 2.095(3) |
| Dy-B1                                         | 2.623(5) |
| Dy-B2                                         | 2.641(5) |
| Dy-B3                                         | 2.627(5) |
| Dy-C1                                         | 2.667(4) |
| Dy-C2                                         | 2.666(4) |
| Dy-C <sub>2</sub> B <sub>3</sub> (centroid)   | 2.230    |
| N-Dy-C <sub>2</sub> B <sub>3</sub> (centroid) | 116.98   |

**Table S2 Selected bond lengths (Å) and angle (°) for 1Dy.** Related to Figure 1.

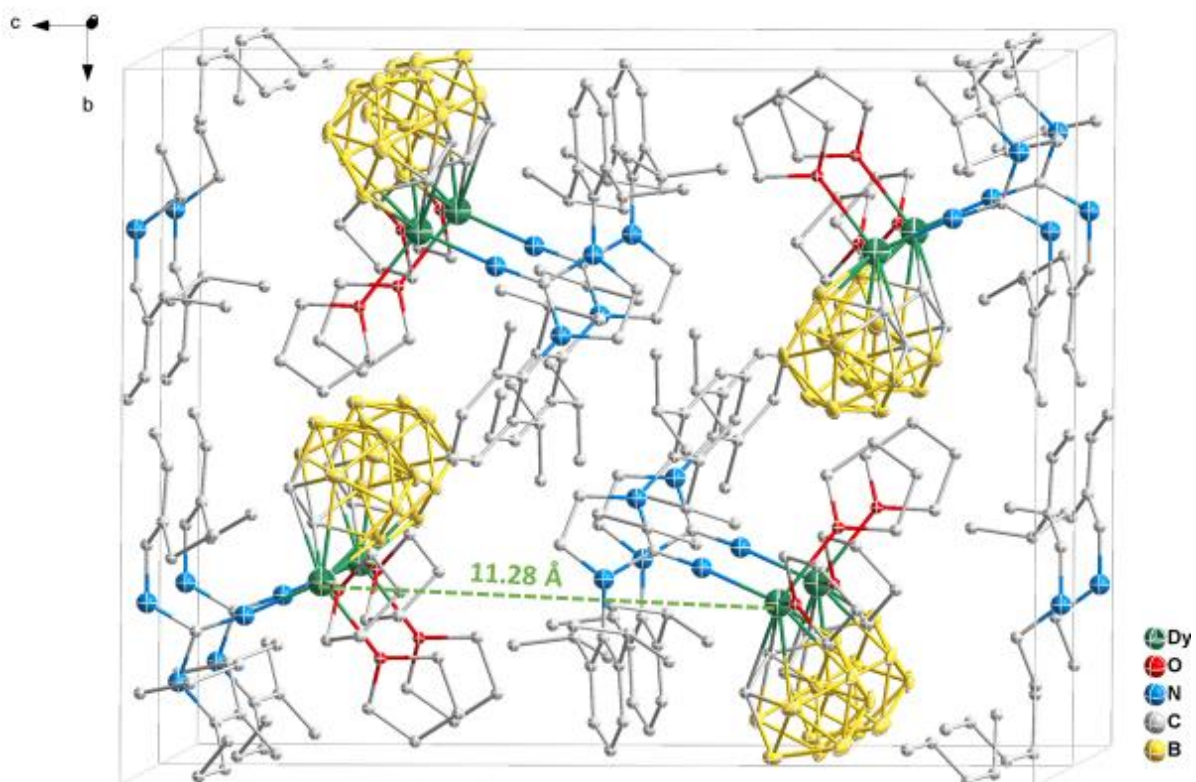

**Figure S2** The crystal packing diagram for 1Dy. Related to Figure 1.

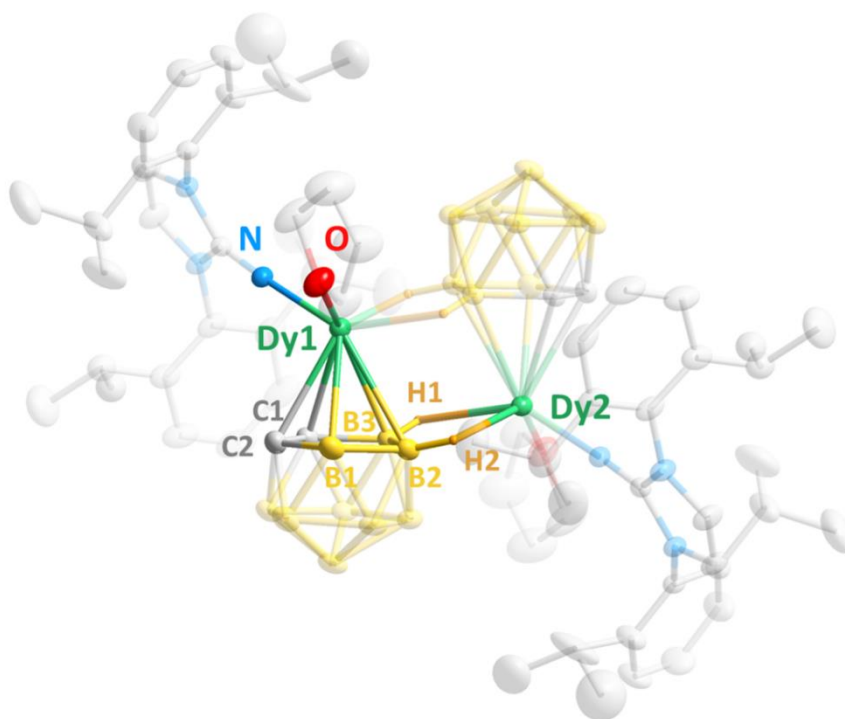

**Figure S3 Thermal ellipsoid representation of the simplified molecular structure of 2Dy shown at the 30% probability level.** All the hydrogen atoms are omitted for clarity except coordinated ones. Related to Figure 1.

|                                                |          |
|------------------------------------------------|----------|
| Dy1-O                                          | 2.377(3) |
| Dy1-N                                          | 2.107(3) |
| Dy1-B1                                         | 2.717(5) |
| Dy1-B2                                         | 2.835(5) |
| Dy1-B3                                         | 2.787(5) |
| Dy1-C1                                         | 2.701(4) |
| Dy1-C2                                         | 2.653(4) |
| Dy2-H1                                         | 2.461    |
| Dy2-H2                                         | 2.251    |
| Dy1-Dy2                                        | 4.081    |
| Dy1-C <sub>2</sub> B <sub>3</sub> (centroid)   | 2.343    |
| N-Dy1-C <sub>2</sub> B <sub>3</sub> (centroid) | 117.27   |
| B3-H1-Dy2                                      | 96.43    |
| B2-H2-Dy2                                      | 109.44   |

**Table S3 Selected bond lengths (Å) and angles (°) for 2Dy.** Related to Figure 1.

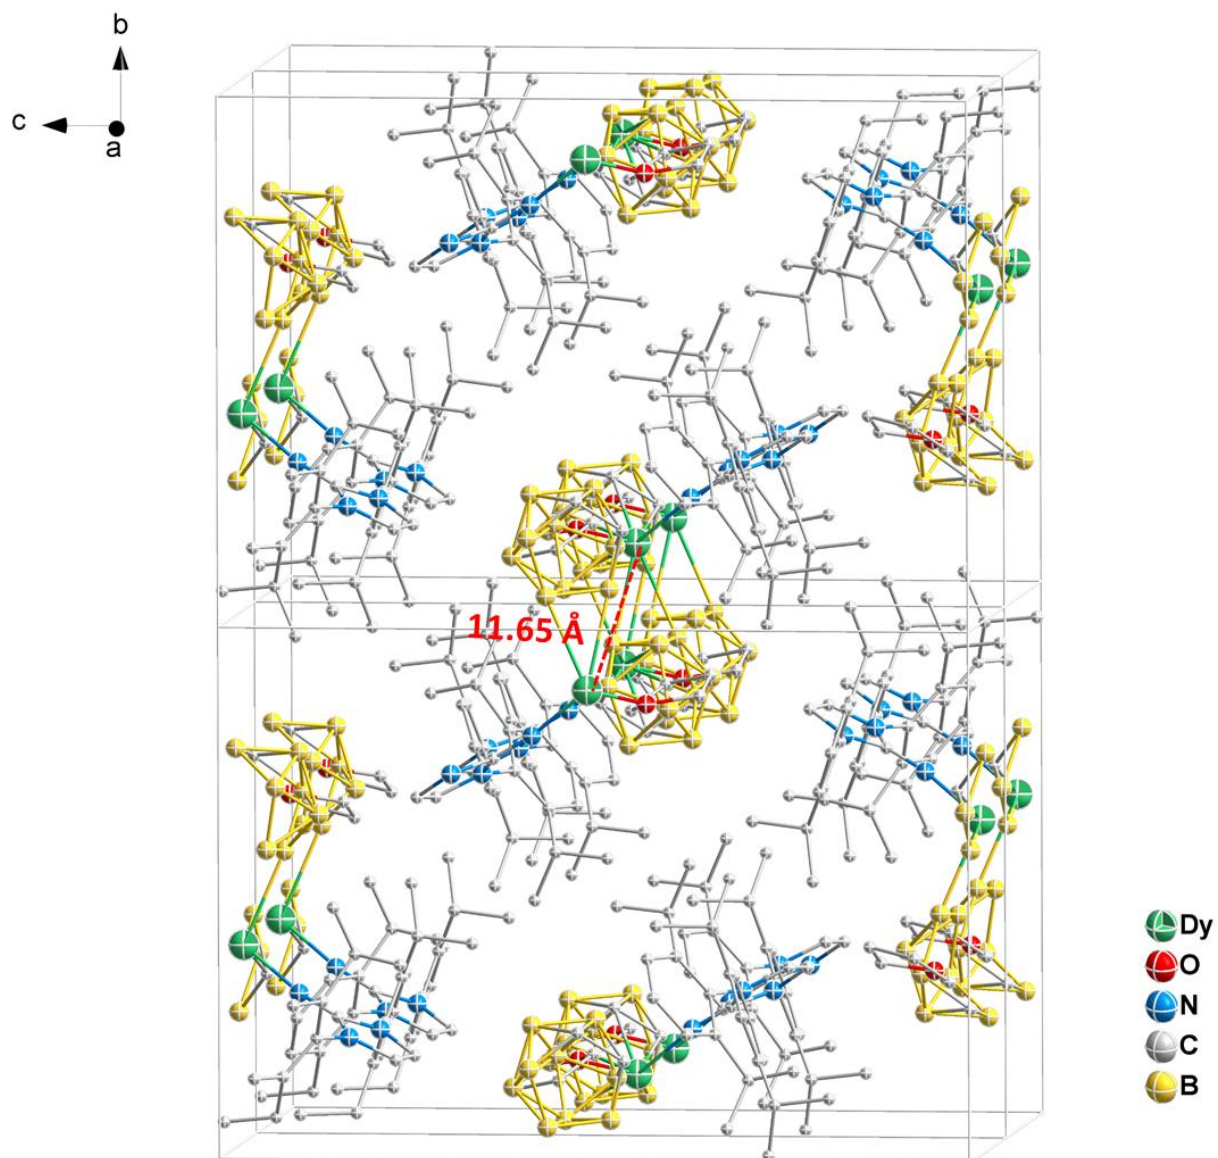

Figure S4 The crystal packing diagram for 2Dy. Related to Figure 1.

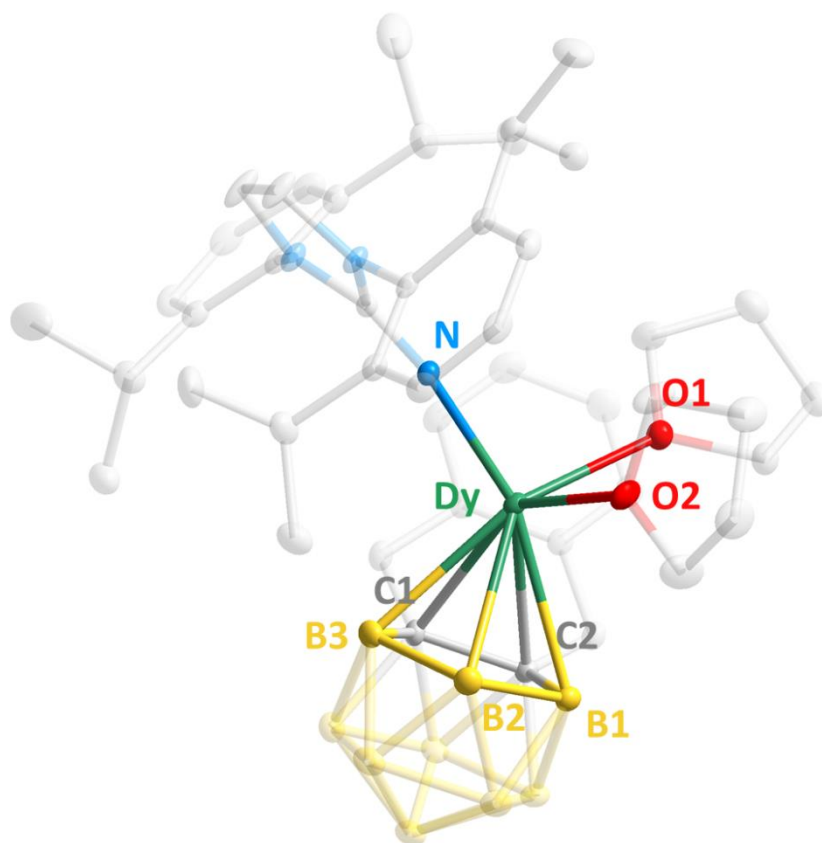

**Figure S5 Thermal ellipsoid representation of the simplified molecular structure of 3Dy shown at the 30% probability level.** All the hydrogen atoms are omitted for clarity except coordinated ones. Related to Figure 1.

|                                               |          |
|-----------------------------------------------|----------|
| Dy-O1                                         | 2.365(2) |
| Dy-O2                                         | 2.354(2) |
| Dy-N                                          | 2.123(3) |
| Dy-B1                                         | 2.712(4) |
| Dy-B2                                         | 2.641(4) |
| Dy-B3                                         | 2.601(4) |
| Dy-C1                                         | 2.698(3) |
| Dy-C2                                         | 2.788(3) |
| Dy-C <sub>2</sub> B <sub>3</sub> (centroid)   | 2.275    |
| N-Dy-C <sub>2</sub> B <sub>3</sub> (centroid) | 131.37   |

**Table S4 Selected bond lengths (Å) and angle (°) for 3Dy.** Related to Figure 1.



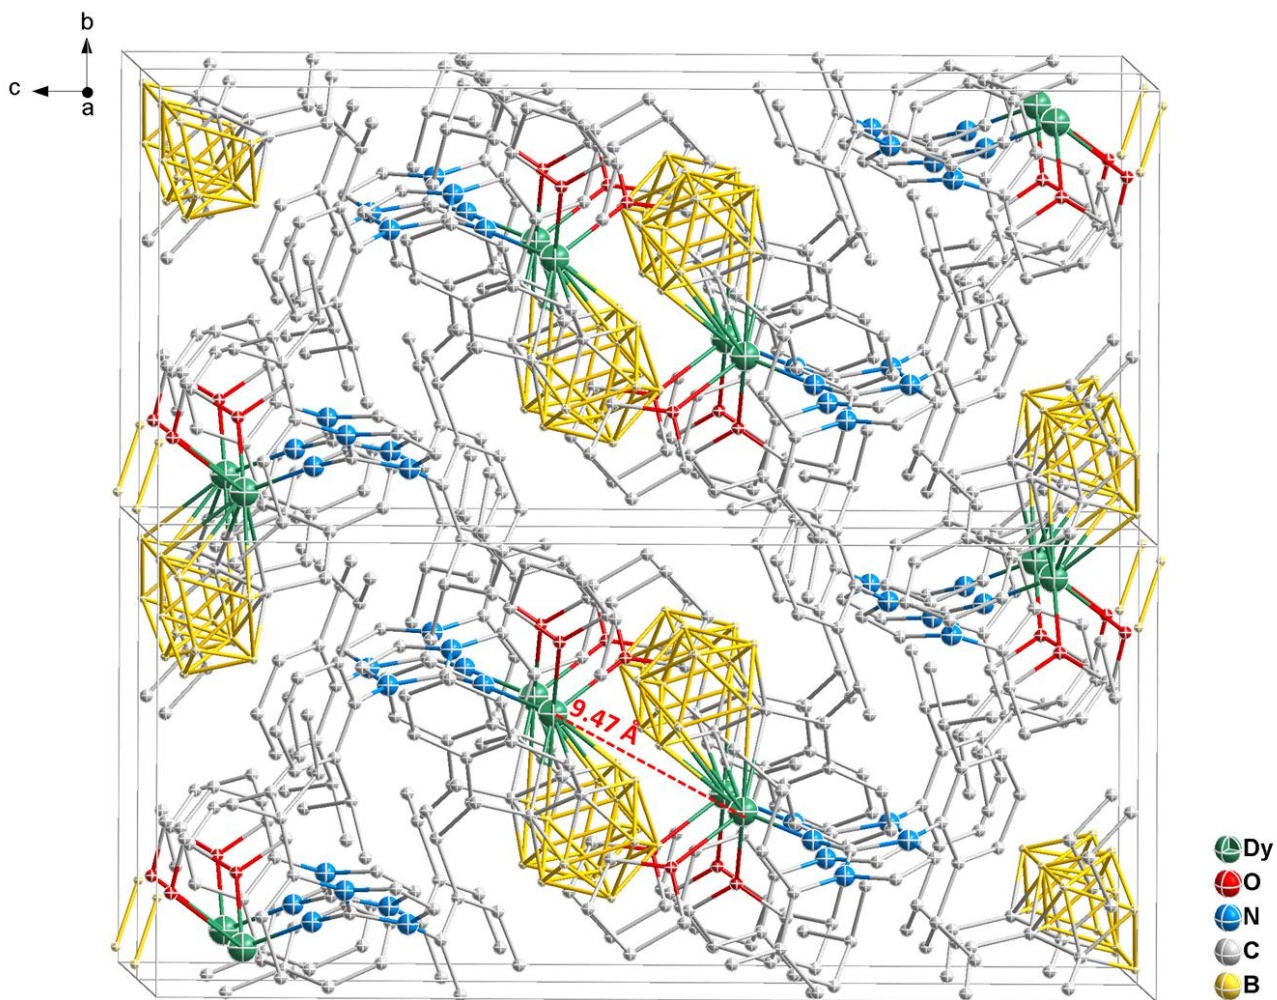

**Figure S6** The crystal packing diagram for 3Dy. Related to Figure 1.

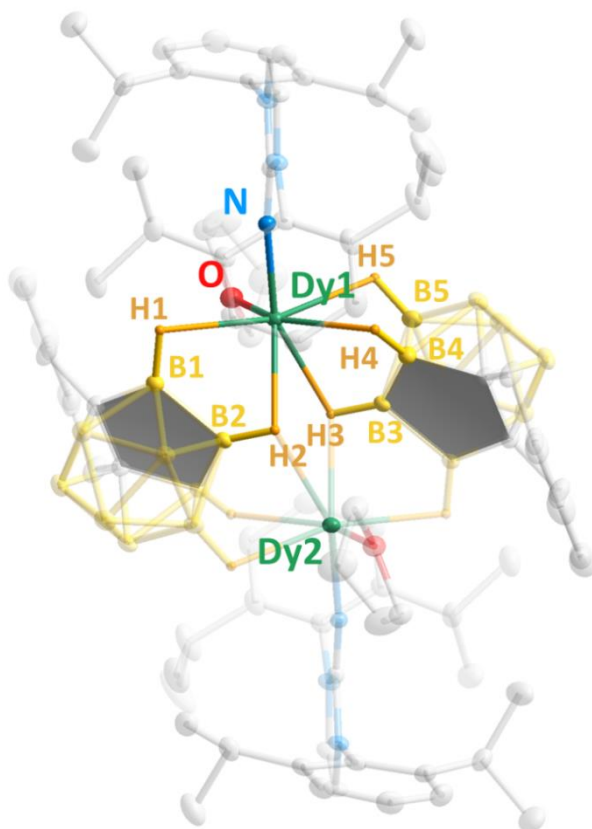

**Figure S7 Thermal ellipsoid representation of the simplified molecular structure of 4Dy shown at the 30% probability level. All the hydrogen atoms are omitted for clarity except coordinated ones. Related to Figure 1.**

|        |          |                                              |        |
|--------|----------|----------------------------------------------|--------|
| Dy1-O  | 2.314(2) | Dy1-H5                                       | 2.549  |
| Dy1-N  | 2.066(2) | Dy1-Dy2                                      | 4.162  |
| Dy1-B1 | 2.781(3) | B1-Dy1-Cent (C <sub>2</sub> B <sub>3</sub> ) | 88.87  |
| Dy1-B2 | 2.648(3) | B2-Dy1-Cent (C <sub>2</sub> B <sub>3</sub> ) | 89.93  |
| Dy1-B3 | 2.804(3) | B3-Dy1-Cent (C <sub>2</sub> B <sub>3</sub> ) | 94.51  |
| Dy1-B4 | 2.715(3) | H4-Dy1-Cent (C <sub>2</sub> B <sub>3</sub> ) | 100.01 |
| Dy1-B5 | 2.904(3) | H5-Dy1-Cent (C <sub>2</sub> B <sub>3</sub> ) | 97.03  |
| Dy1-H1 | 2.570    |                                              |        |
| Dy1-H2 | 2.415    |                                              |        |
| Dy1-H3 | 2.500    |                                              |        |
| Dy1-H4 | 2.306    |                                              |        |

**Table S5 Selected bond lengths (Å) and angles (°) for 4Dy. Related to Figure 1.**

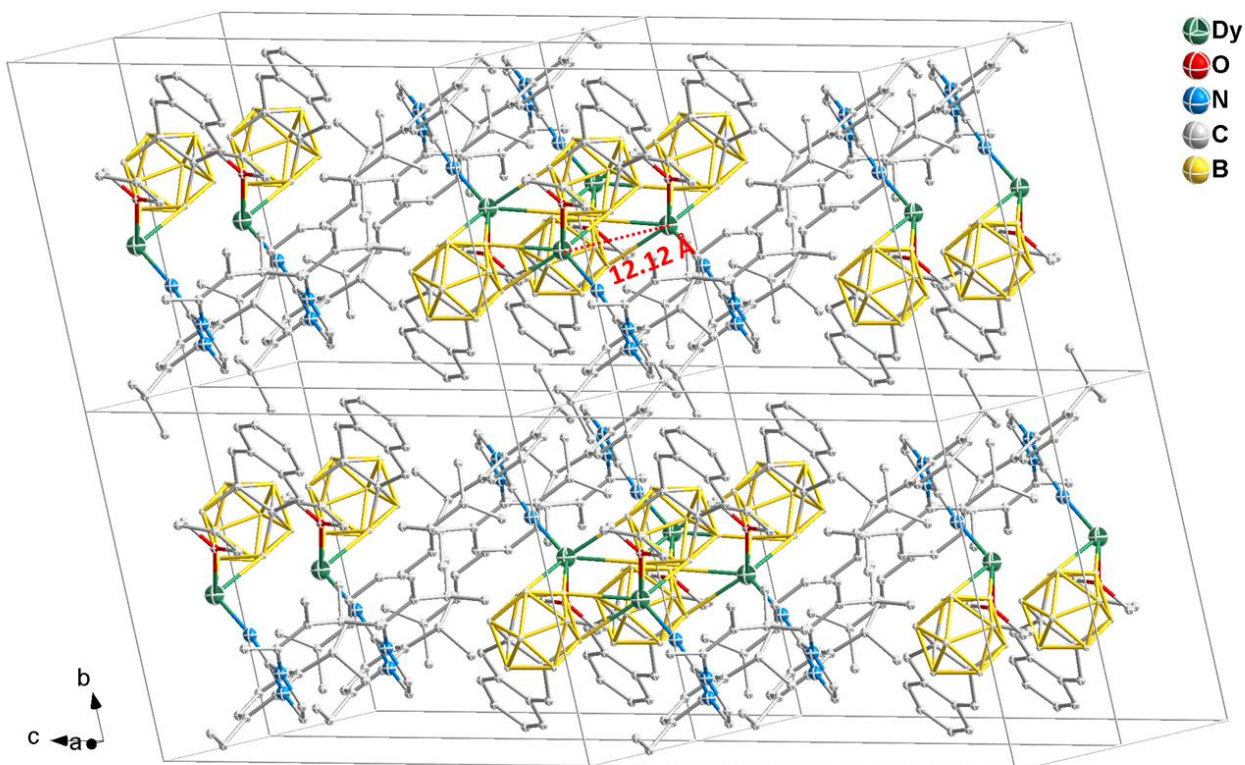

**Figure S8** The crystal packing diagram for 4Dy. Related to Figure 1.

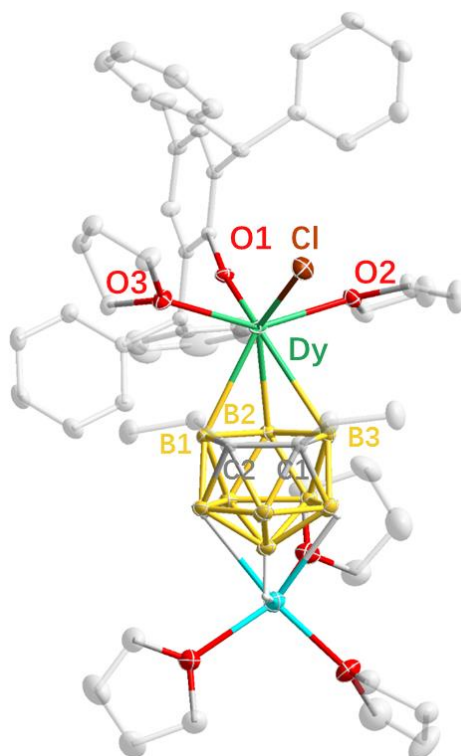

**Figure S9** Thermal ellipsoid (30% probability) representation of the simplified molecular structure of **5Dy**. All the hydrogen atoms are omitted for clarity. Related to Figure 1.

|                                             |          |
|---------------------------------------------|----------|
| Dy-O1                                       | 2.112(2) |
| Dy-O2                                       | 2.455(2) |
| Dy-O3                                       | 2.432(3) |
| Dy-Cl                                       | 2.716(3) |
| Dy-B1                                       | 2.570(3) |
| Dy-B2                                       | 2.868(4) |
| Dy-B3                                       | 2.263(4) |
| Dy-C1                                       | 3.155(2) |
| Dy-C2                                       | 3.241(2) |
| Dy-C <sub>2</sub> B <sub>3</sub> (centroid) | 2.543    |

**Table S6** Selected bond lengths (Å) for compound **5Dy**. Related to Figure 1.

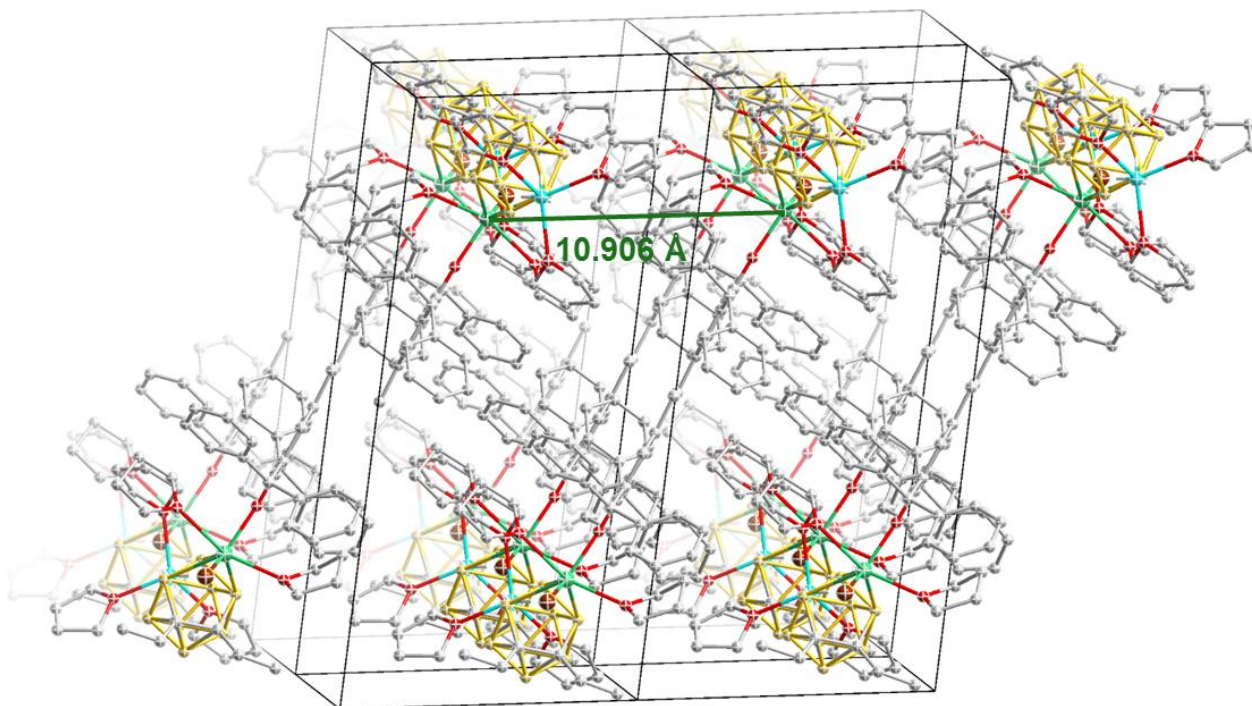

**Figure S10** The crystal packing diagram for 5Dy. Related to Figure 1.

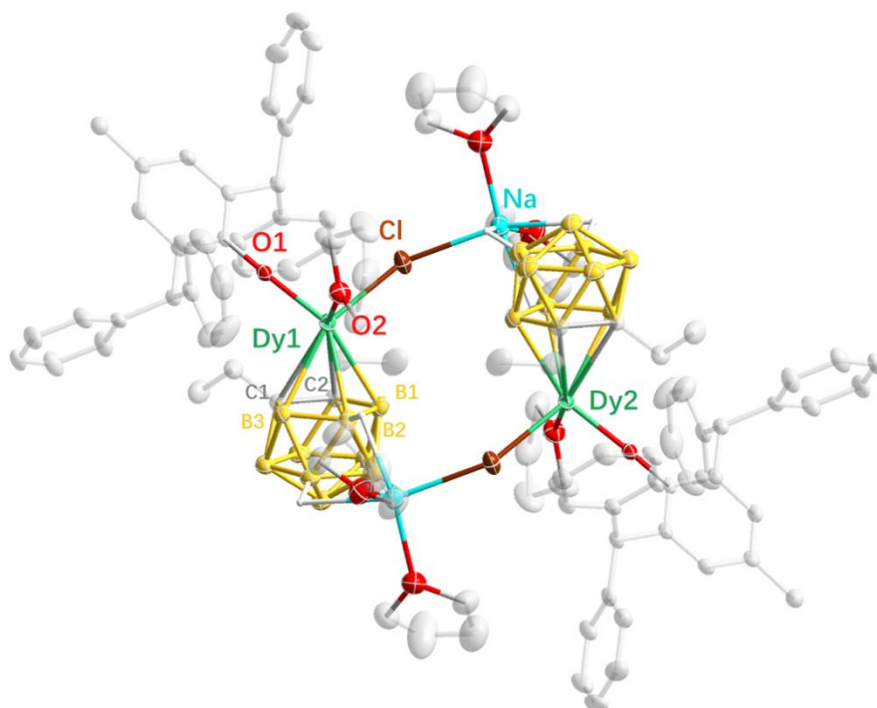

**Figure S11 Thermal ellipsoid representation of the simplified molecular structure of 6Dy shown at the 30% probability level. All the hydrogen atoms are omitted for clarity except coordinated ones. Related to Figure 1.**

|                                             |          |
|---------------------------------------------|----------|
| Dy-O1                                       | 2.098(4) |
| Dy-O2                                       | 2.348(4) |
| Dy-Cl                                       | 2.626(3) |
| Dy1-C1                                      | 2.726(5) |
| Dy1-C2                                      | 2.702(6) |
| Dy1-B1                                      | 2.657(6) |
| Dy1-B2                                      | 2.689(7) |
| Dy1-B3                                      | 2.664(6) |
| Dy1-Dy2                                     | 6.907(4) |
| Na-Cl                                       | 2.738(3) |
| Dy-C <sub>2</sub> B <sub>3</sub> (centroid) | 2.268(2) |

**Table S7 Selected bond lengths (Å) and angles (°) for compound 6Dy. Related to Figure 1.**

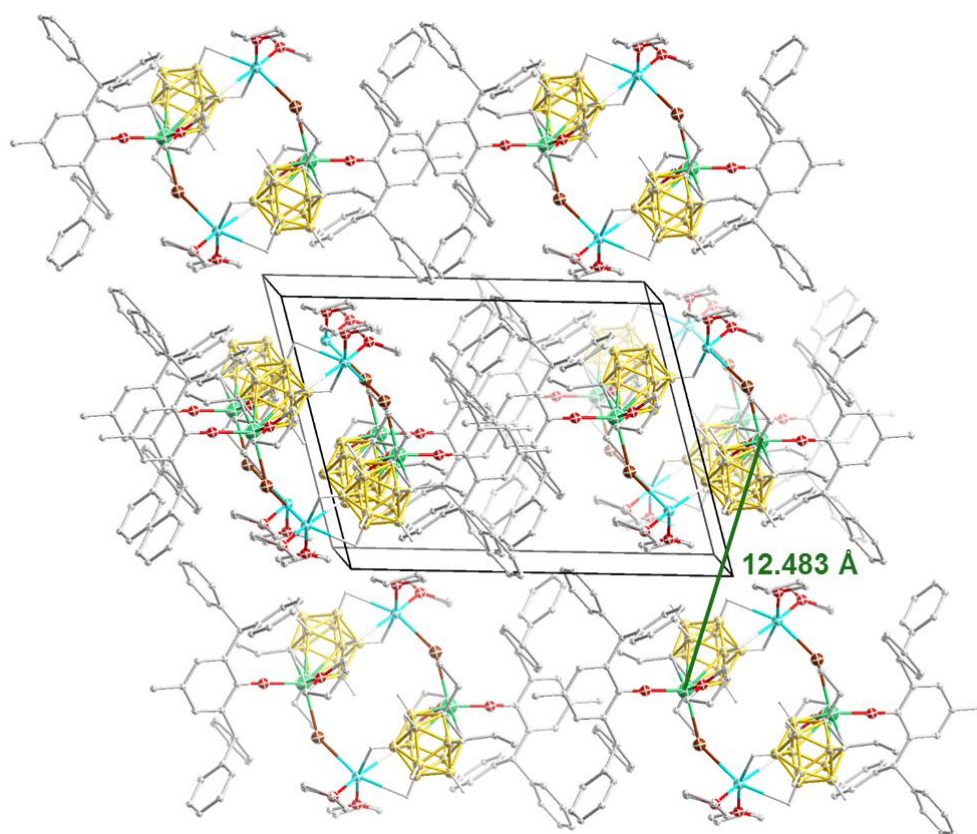

**Figure S12** The crystal packing diagram for **6Dy**. Related to Figure 1.

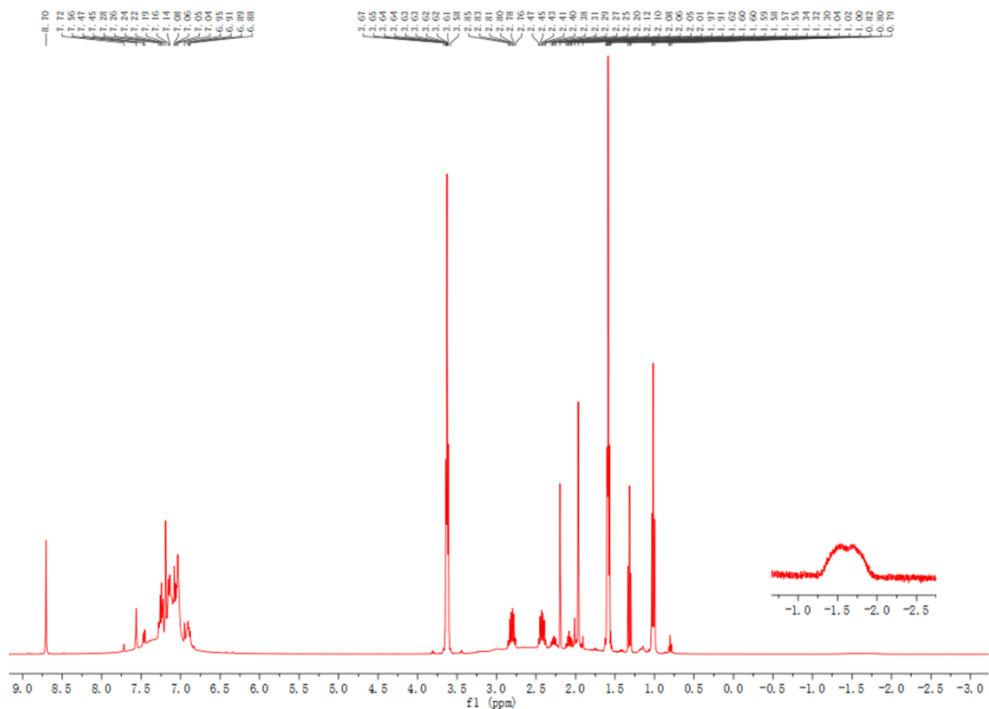

**Figure S13** <sup>1</sup>H NMR spectrum (Pyridine-*d*<sub>5</sub>, 400 MHz) of 5Y. Related to Figure 2.

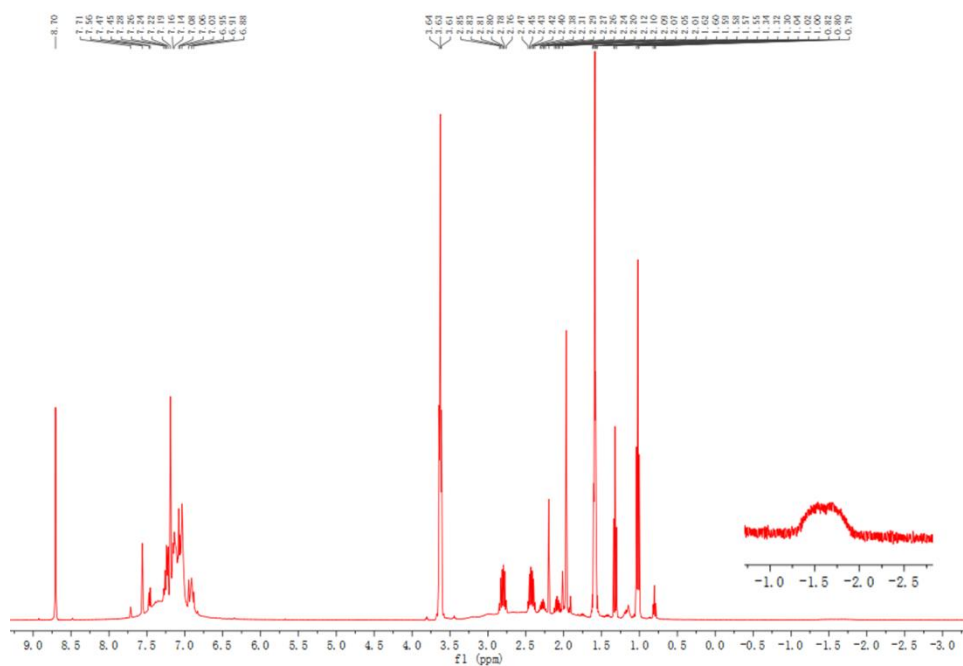

**Figure S14** <sup>1</sup>H NMR spectrum (Pyridine-*d*<sub>5</sub>, 400 MHz) of 6Y. Related to Figure 2.



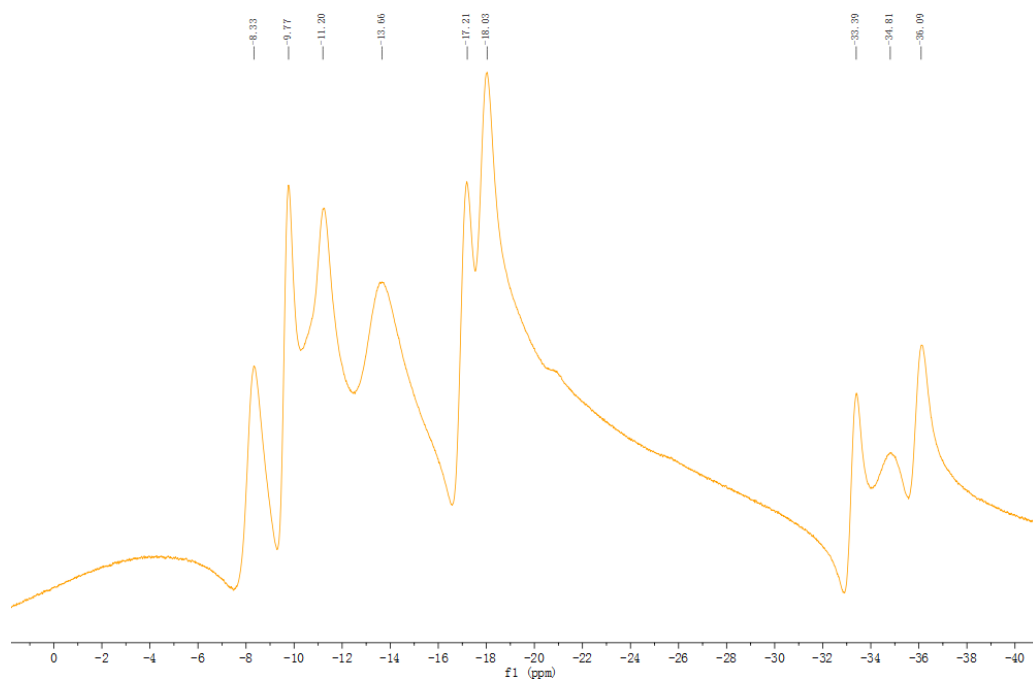

**Figure S15**  $^{11}\text{B}$  NMR spectrum (Pyridine- $d_5$ , 400 MHz) of **5Y**. Related to Figure 2.

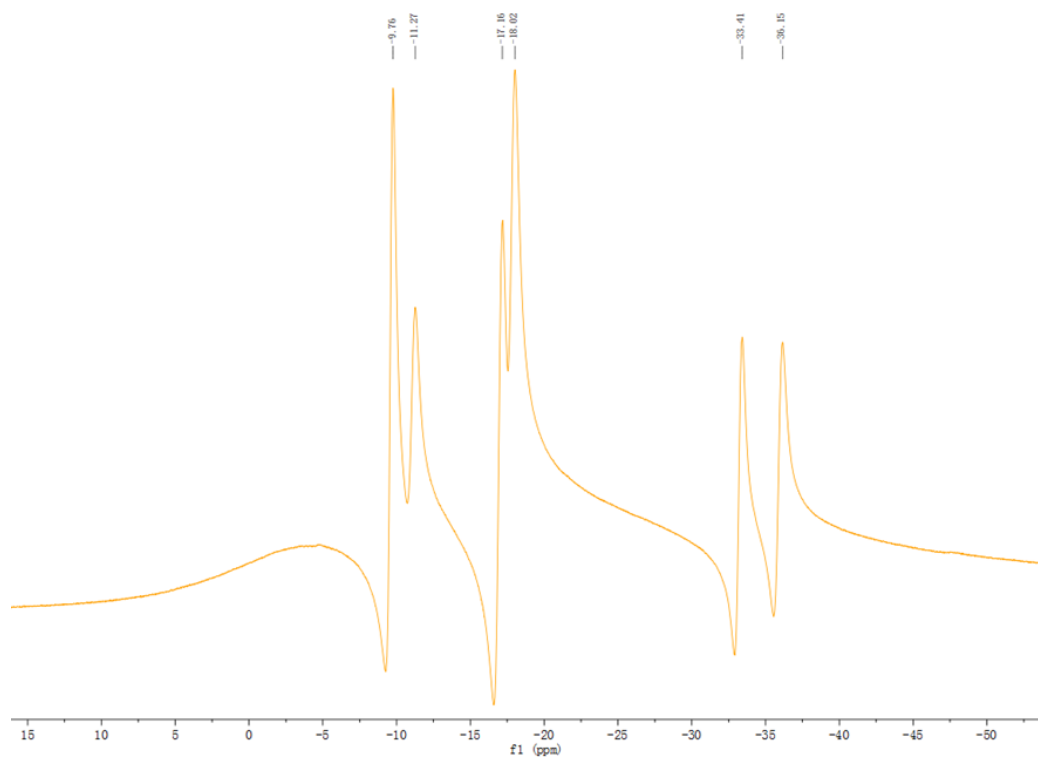

**Figure S16**  $^{11}\text{B}$  NMR spectrum (Pyridine- $d_5$ , 400 MHz) of **6Y**. Related to Figure 2.

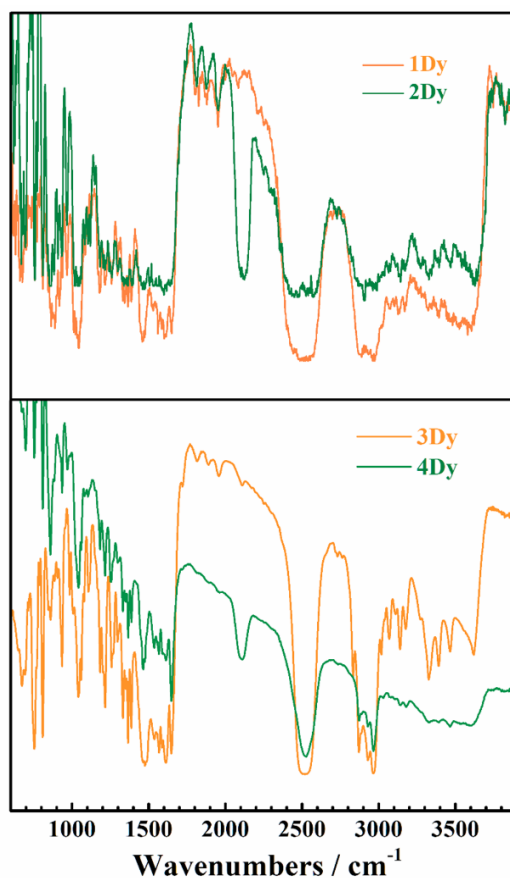

**Figure S17** Infrared spectrum of complexes 1Dy and 3Dy (orange) and 2Y and 4Dy (green). Related to Figure 2.

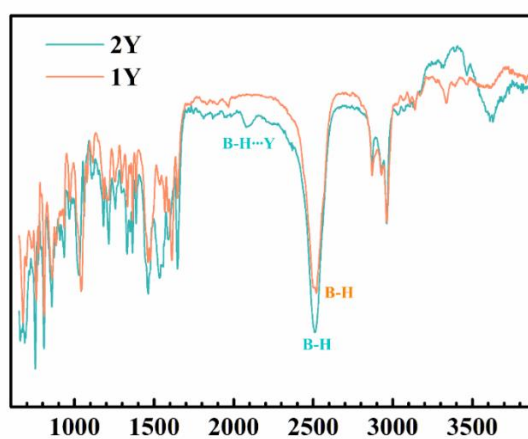

**Figure S18** Infrared spectrum of complexes 1Y (orange) and 2Y (cyan). Related to Figure 2.

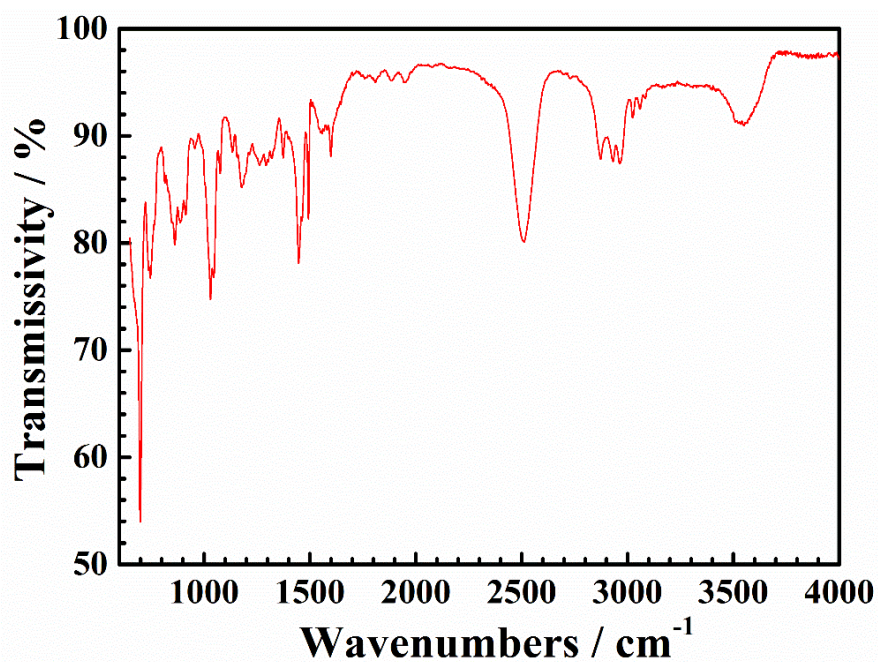

Figure S19 Infrared spectrum of compound 5Dy. Related to Figure 2.

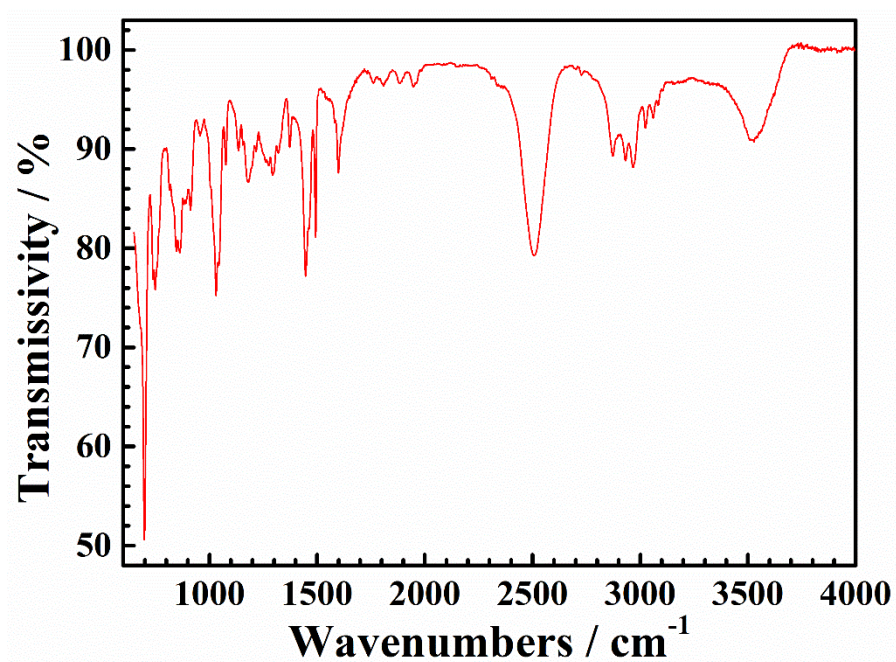

Figure S20 Infrared spectrum of compound 5Y. Related to Figure 2.

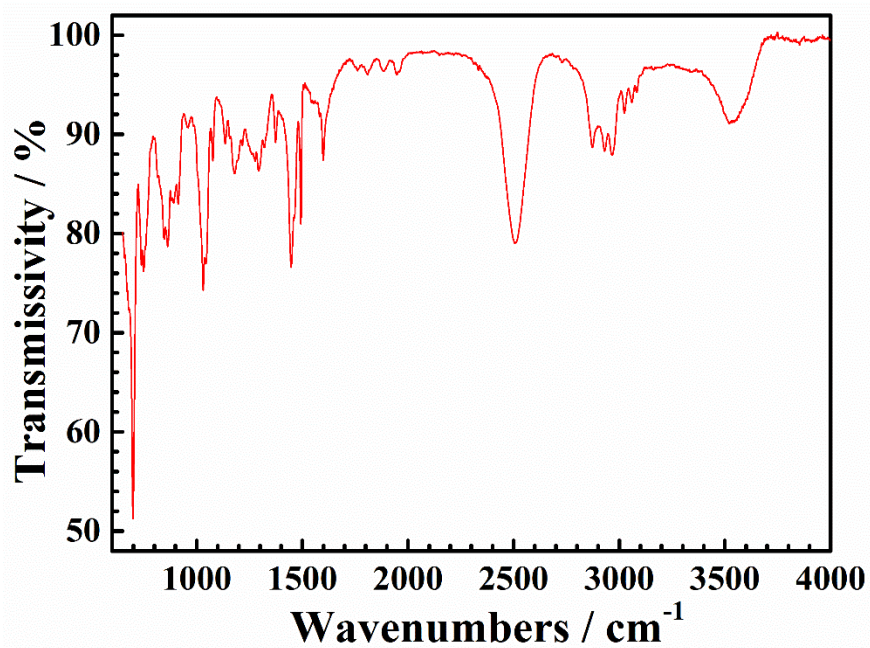

Figure S21 Infrared spectrum of compound 6Dy. Related to Figure 2.

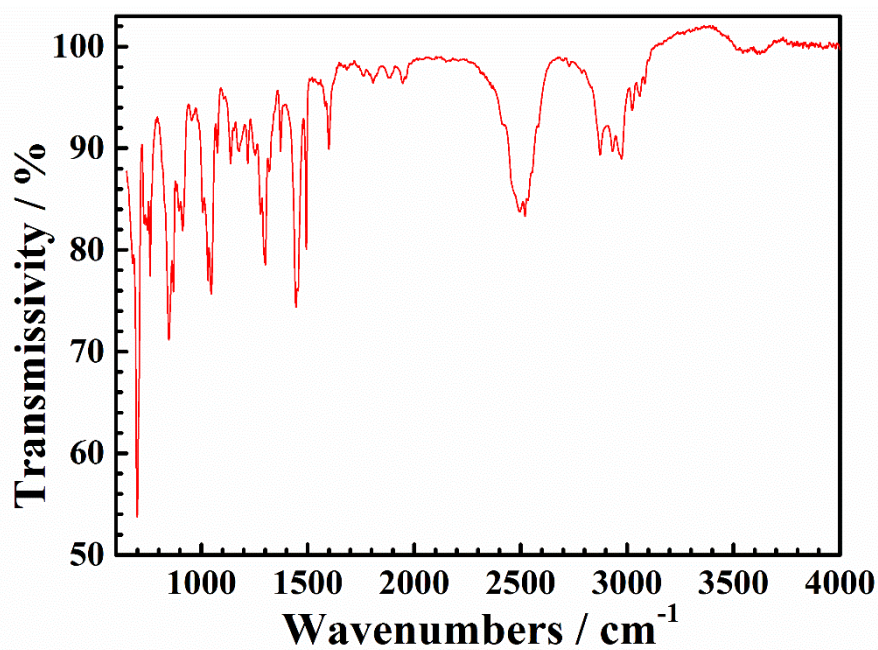

Figure S22 Infrared spectrum of compound 6Y. Related to Figure 2.

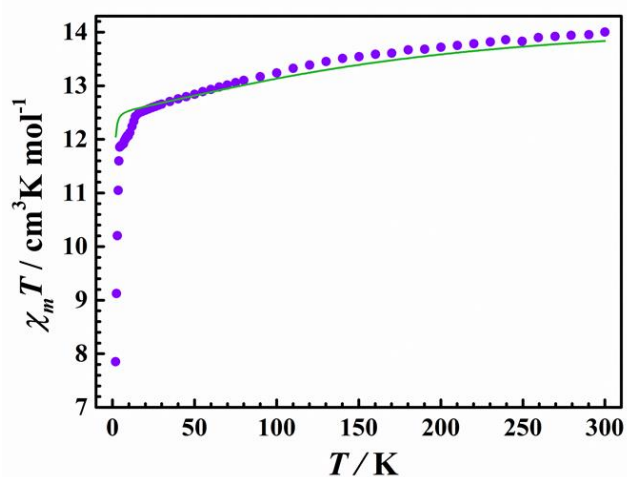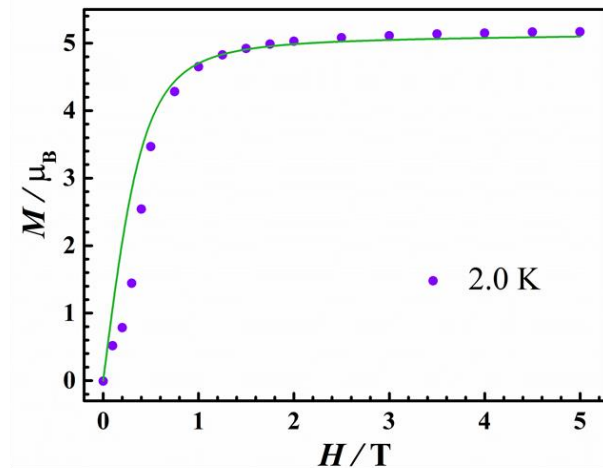

**Figure S23** The temperature dependent susceptibility of  $\chi_m T$  and the field dependent magnetization ( $M/H$ ) for 1Dy. The  $\chi_m T$  in an applied DC magnetic field of 1 kOe of polycrystalline sample (left), the  $M/H$  at 2.0 K up to 5 Tesla (right). The solid lines are best fits from *ab initio* calculations. Related to Figure 6.

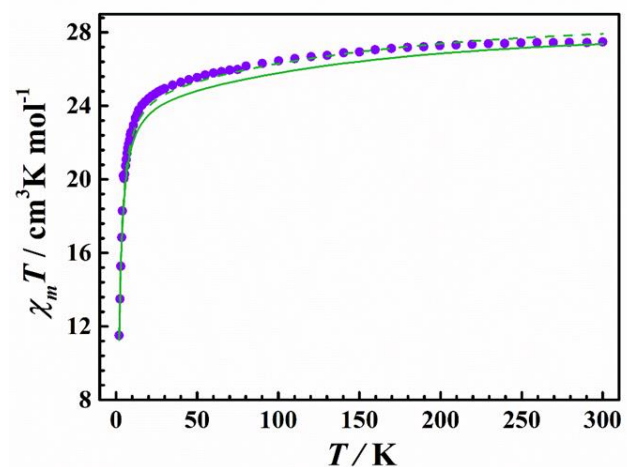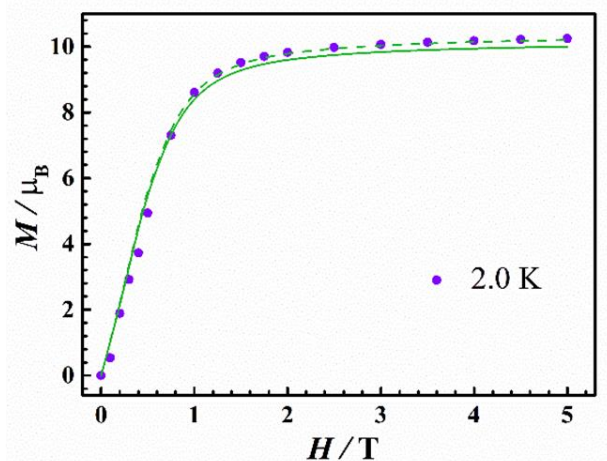

**Figure S24** The temperature dependent susceptibility of  $\chi_m T$  and the field dependent magnetization ( $M/H$ ) for 2Dy. The  $\chi_m T$  in an applied DC magnetic field of 1 kOe of polycrystalline sample (left), the  $M/H$  at 2.0 K up to 5 Tesla (right). The solid lines are best fits from *ab initio* calculations. Related to Figure 6.

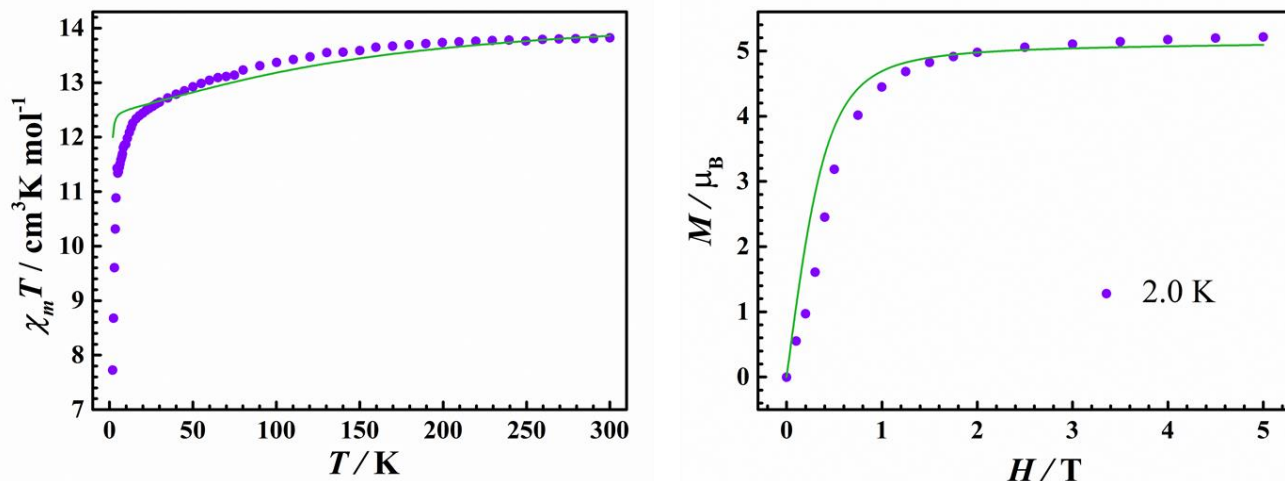

**Figure S25** The temperature dependent susceptibility of  $\chi_m T$  and the field dependent magnetization ( $M/H$ ) for **3Dy**. The  $\chi_m T$  in an applied DC magnetic field of 1 kOe of polycrystalline sample (left), the  $M/H$  at 2.0 K up to 5 Tesla (right). The solid lines are best fits from *ab initio* calculations. Related to Figure 5.

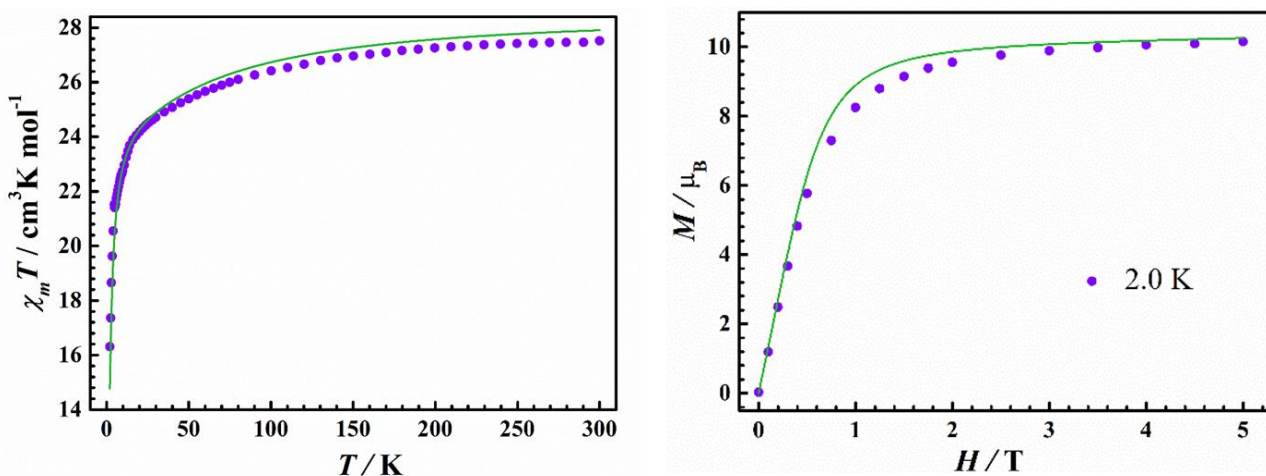

**Figure S26** The temperature dependent susceptibility of  $\chi_m T$  and the field dependent magnetization ( $M/H$ ) for **4Dy**. The  $\chi_m T$  in an applied DC magnetic field of 1 kOe of polycrystalline sample (left), the  $M/H$  at 2.0 K up to 5 Tesla (right). The solid lines are best fits from *ab initio* calculations. Related to Figure 5.

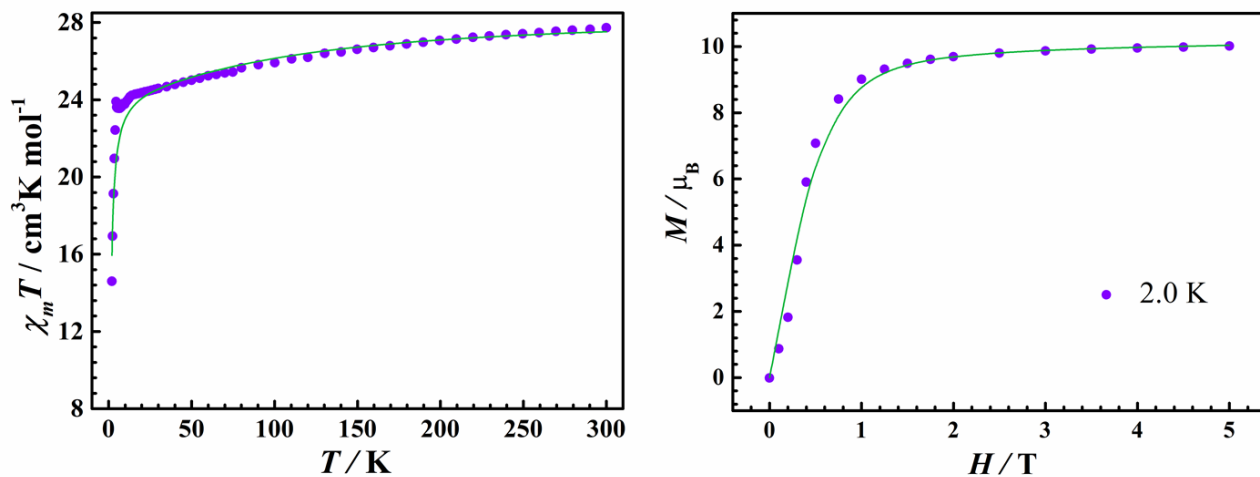

**Figure S27** The temperature dependent susceptibility of  $\chi_m T$  and the field dependent magnetization ( $M/H$ ) for **6Dy**. The  $\chi_m T$  in an applied DC magnetic field of 1 kOe of polycrystalline sample (left), the  $M/H$  at 2.0 K up to 5 Tesla (right). The solid lines are best fits from *ab initio* calculations. Related to Figure 5.

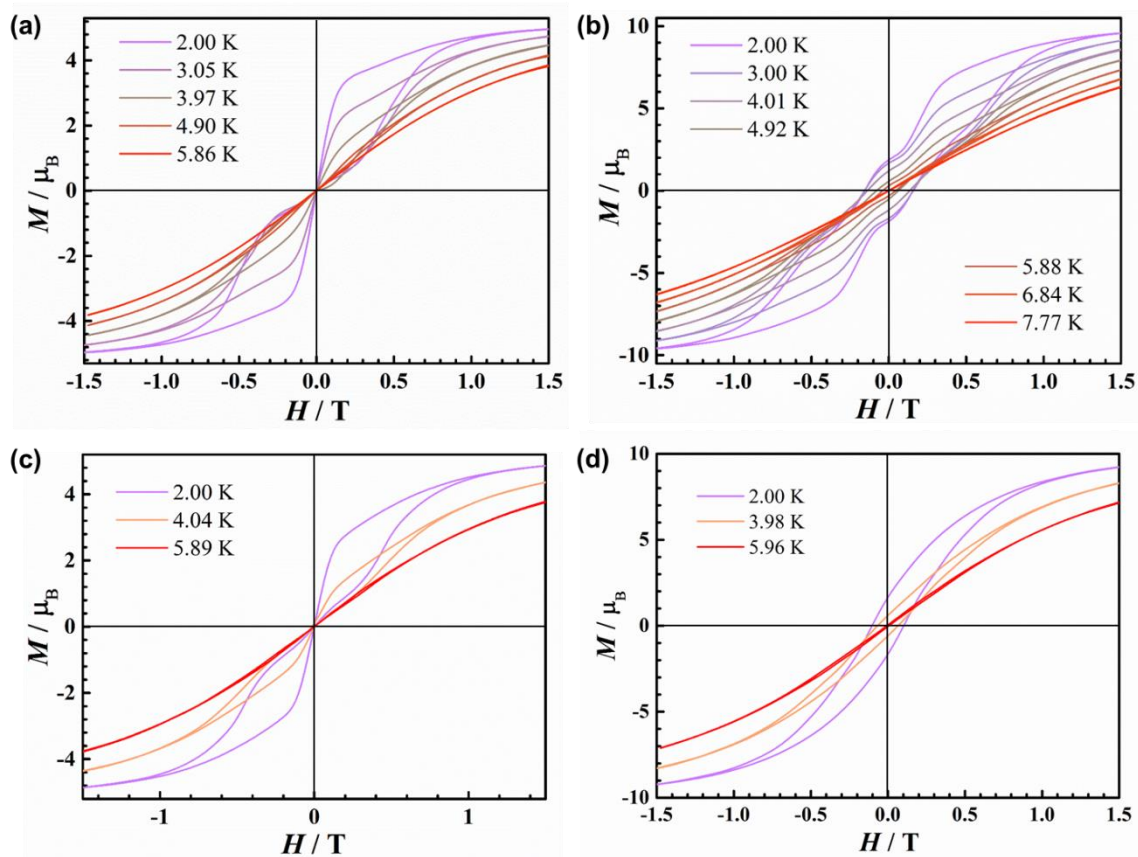

**Figure S28 The magnetic hysteresis loop measurements.** The magnetic hysteresis loop of polycrystalline samples 1Dy (a), 2Dy (b), 3Dy (c) and 4Dy (d) under an average sweep rate of  $15 \text{ Oe s}^{-1}$ . Related Figure 5 and Figure 6.

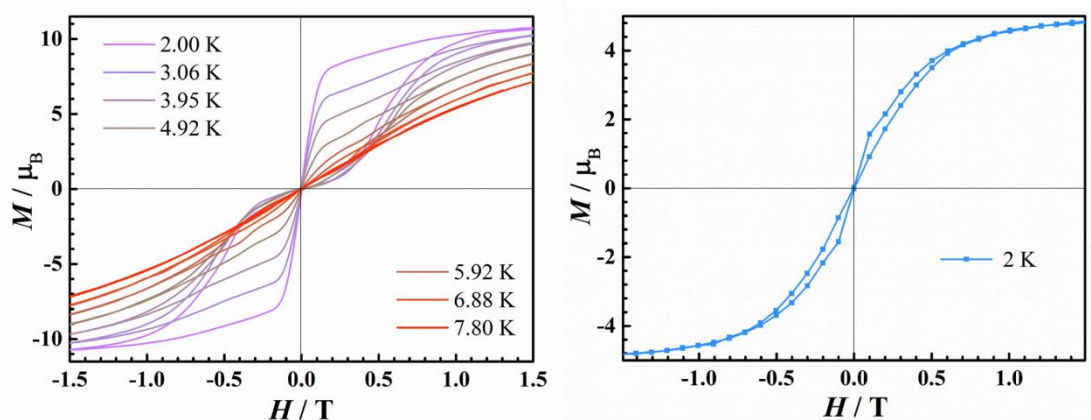

**Figure S29 The magnetic hysteresis loop measurements.** The magnetic hysteresis loop of polycrystalline samples **2Dy@2Y** (left) and **5Dy@5Y** (right) under an average sweep rate of  $15 \text{ Oe s}^{-1}$ . Related to Figure 5 and Figure 6.



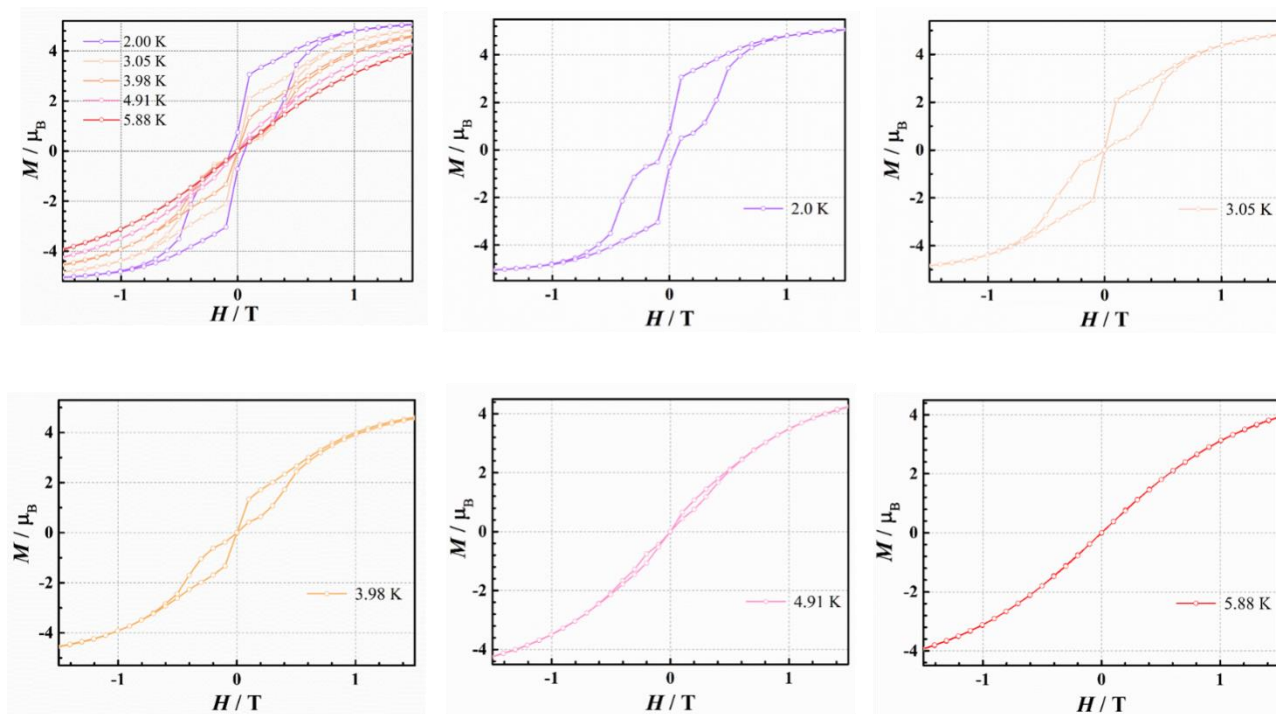

**Figure S30 The magnetic hysteresis loop measurements.** Magnetic hysteresis loops for  $6\text{Dy}$  with an average sweep rate of  $15 \text{ Oe s}^{-1}$ . Related to Figure 5.

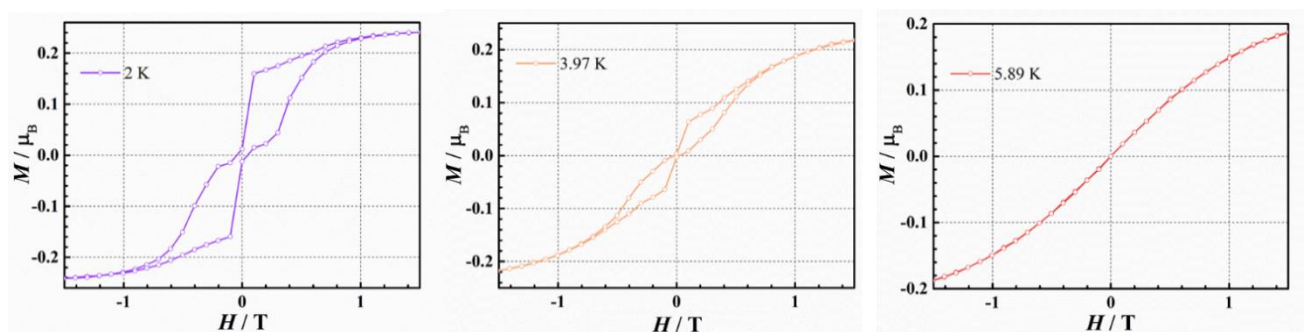

**Figure S31 The magnetic hysteresis loop measurements.** Magnetic hysteresis loops for  $6\text{Dy}@6\text{Y}$  with an average sweep rate of  $15 \text{ Oe s}^{-1}$ . Related to Figure 5.

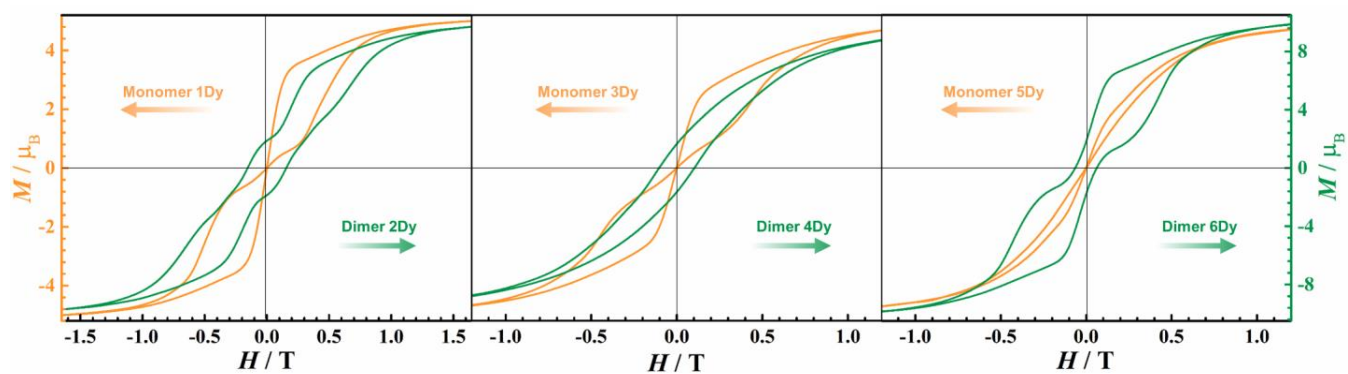

**Figure S32 The magnetic hysteresis loop measurements.** The comparison of magnetic hysteresis loops between polycrystalline samples **1Dy** and **2Dy** (left); **3Dy** and **4Dy** (middle); **5Dy** and **6Dy** (right) at 2 K under an average sweep rate of  $15 \text{ Oe s}^{-1}$ . Related to Figure 5 and Figure 6.

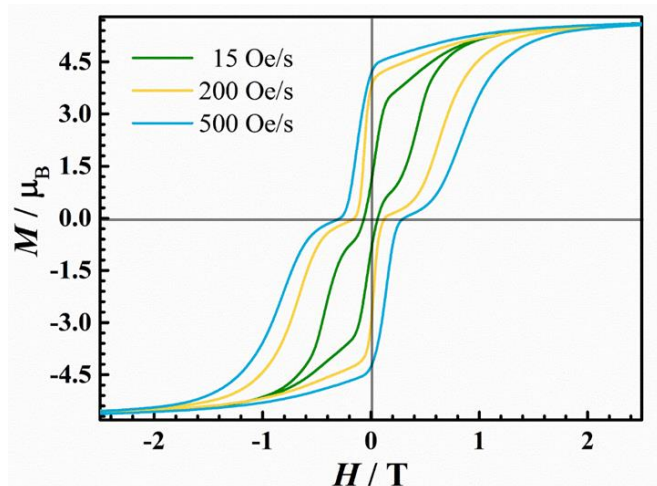

**Figure S33 The magnetic hysteresis loop measurements.** Magnetic hysteresis loop measurements for **6Dy** with accelerated magnetic field sweep rate from  $15 \text{ Oe/s}$  to  $500 \text{ Oe/s}$  at 2 K. Related to Figure 5.

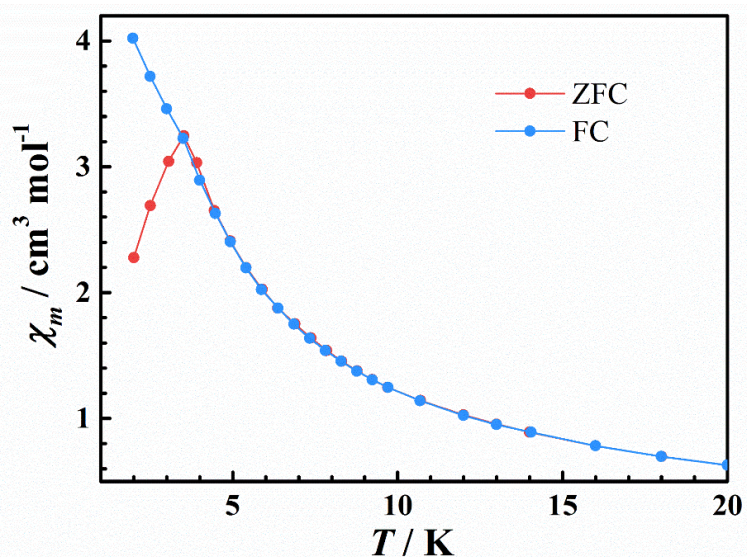

**Figure S34** The Field-cooled (FC, blue line) and zero-field-cooled (ZFC, red line) variable-temperature magnetic susceptibility. The FC-ZFC for polycrystalline sample of **1Dy** with 2 KOe DC field in cool mode from 20 K to 2 K and in warm mode from 2 K to 20 K respectively. Related to Figure 5.

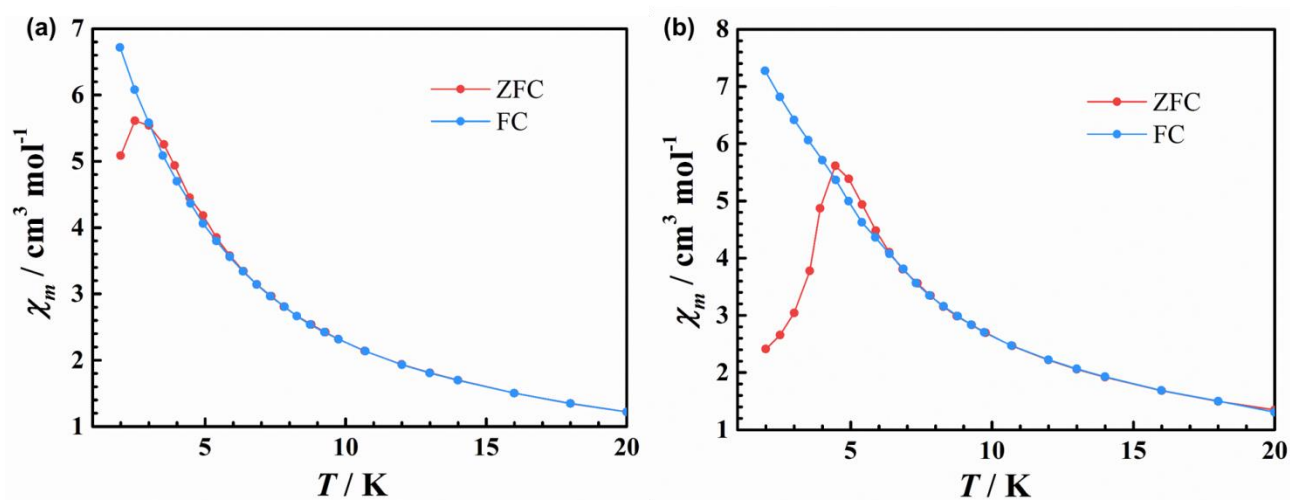

**Figure S35** The Field-cooled (FC, blue line) and zero-field-cooled (ZFC, red line) variable-temperature magnetic susceptibility. The FC-ZFC for polycrystalline sample of **2Dy** (a) and **2Dy@2Y** (b) with 2 KOe DC field in cool mode from 20 to 2 K and in warm mode from 2 to 20 K respectively. Related to Figure 6.

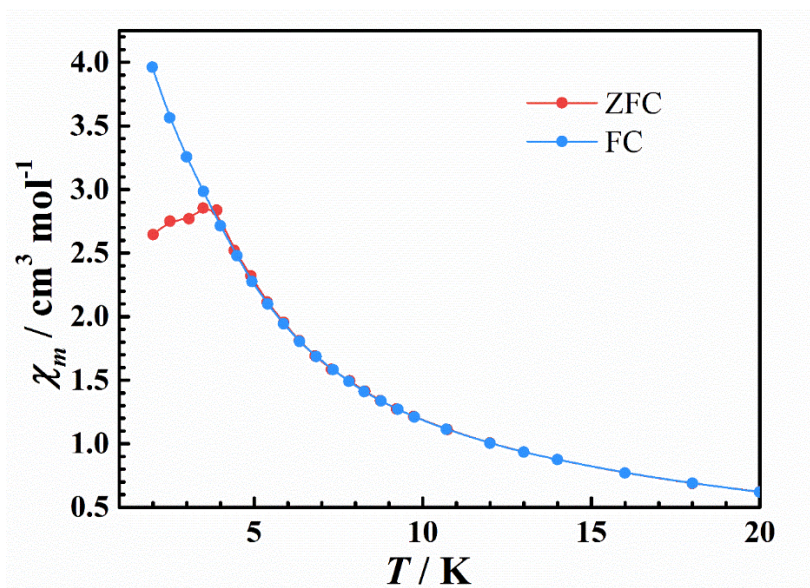

**Figure S36** The Field-cooled (FC, blue line) and zero-field-cooled (ZFC, red line) variable-temperature magnetic susceptibility. The FC-ZFC for polycrystalline sample of **3Dy** with 2 KOe DC field in cool mode from 20 K to 2 K and in warm mode from 2 K to 20 K respectively. Related to Figure 5.

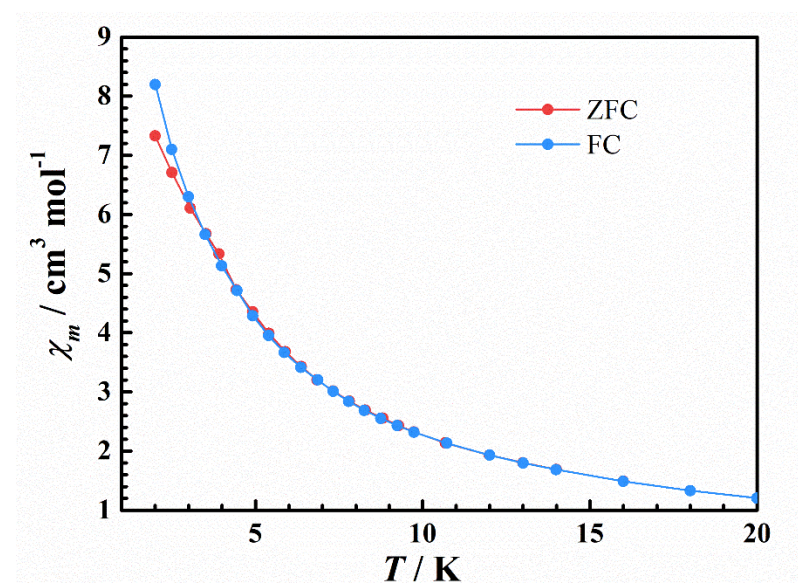

**Figure S37** The Field-cooled (FC, blue line) and zero-field-cooled (ZFC, red line) variable-temperature magnetic susceptibility. The FC-ZFC for polycrystalline sample of **4Dy** with 2 KOe DC field in cool mode from 20 K to 2 K and in warm mode from 2 K to 20 K respectively. Related to Figure 5.

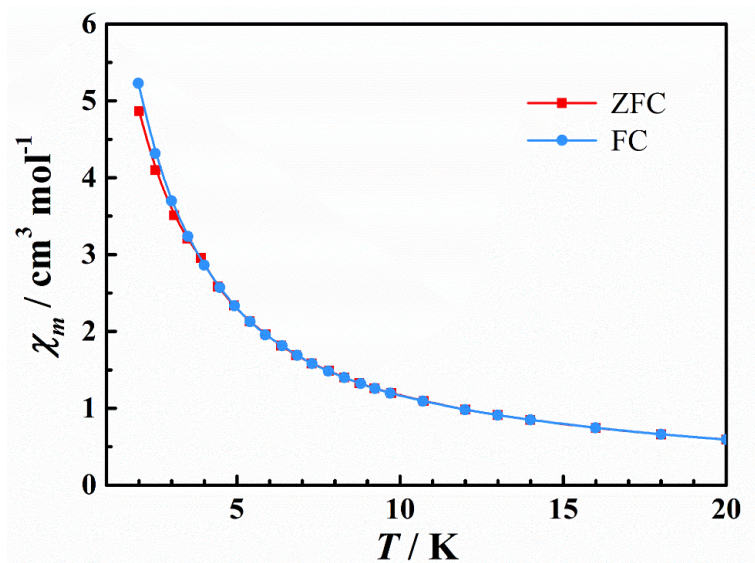

**Figure S38** The Field-cooled (FC, blue line) and zero-field-cooled (ZFC, red line) variable-temperature magnetic susceptibility. The FC-ZFC for polycrystalline sample of **5Dy@5Y** with 2 KOe DC field in cool mode from 20 K to 2 K and in warm mode from 2 K to 20 K respectively. Related to Figure 5.

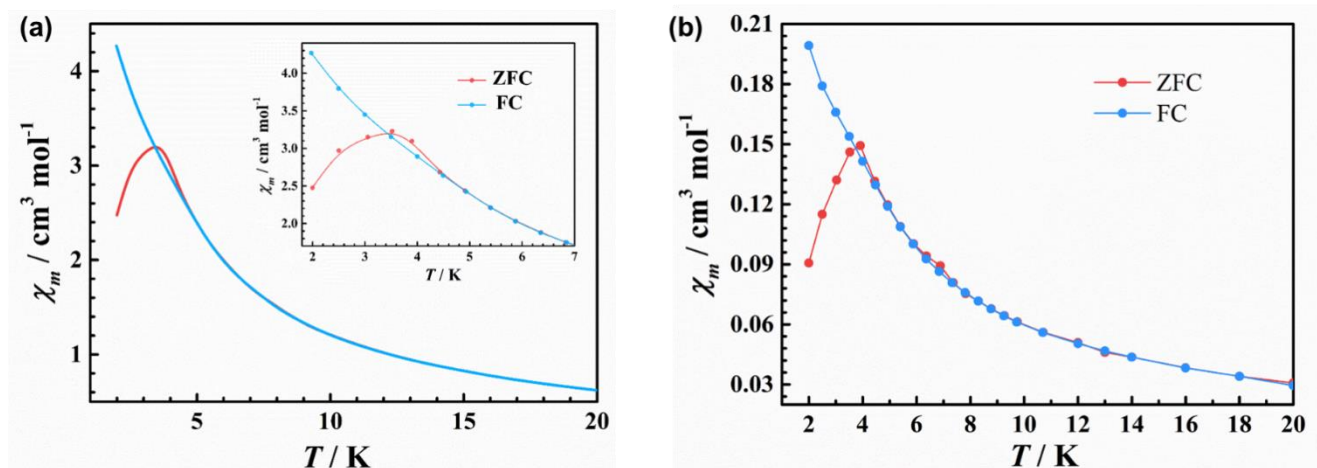

**Figure S39** The Field-cooled (FC, blue line) and zero-field-cooled (ZFC, red line) variable-temperature magnetic susceptibility. The FC-ZFC for polycrystalline sample of **6Dy** (a) and **6Dy@6Y** (b) with 2 KOe DC field in cool mode from 20 K to 2 K and in warm mode from 2 K to 20 K respectively. Related to Figure 5.

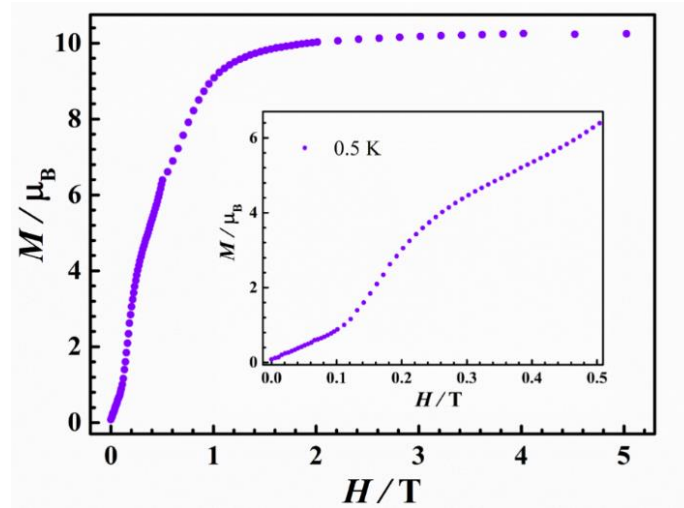

**Figure S40** The field dependent magnetization ( $M/H$ ). The  $M/H$  curve for polycrystalline sample of **2Dy** at 0.5 K up to 5 Tesla. Related to Figure 6.

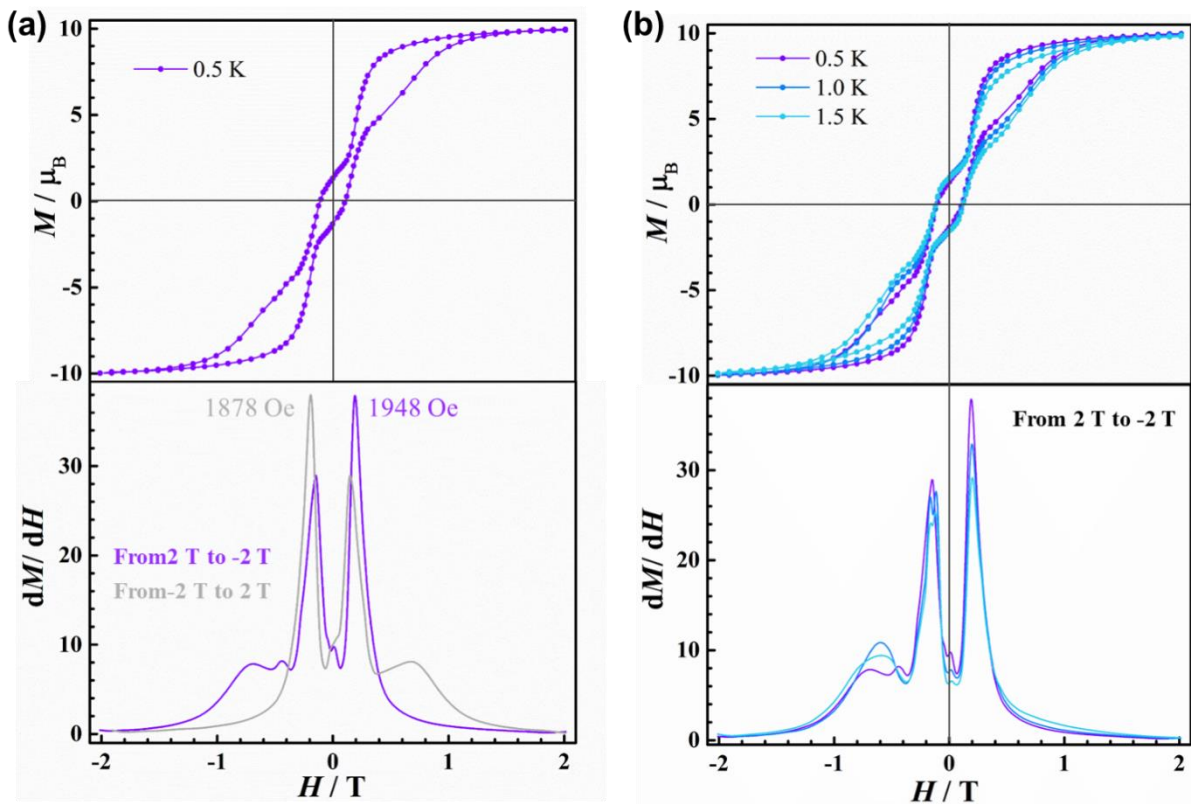

**Figure S41** The magnetic hysteresis loop measurements of **2Dy**. Magnetic hysteresis loops (top) and the first derivative of magnetization ( $dM/dH$ ) versus magnetic field (bottom) for polycrystalline sample of **2Dy** at ultra-low temperature with an average sweep rate of  $15 \text{ Oe s}^{-1}$ . Related to Figure 6.

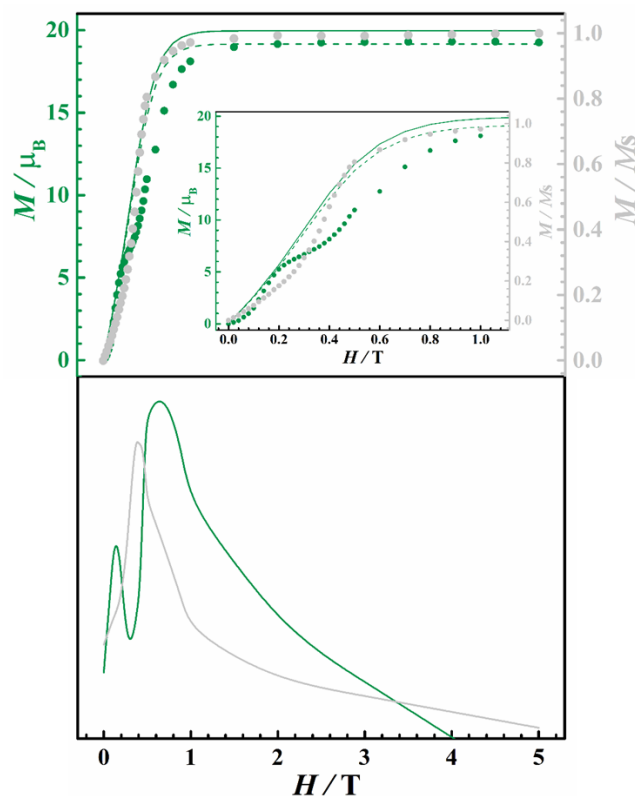

**Figure S42 The field dependent magnetization ( $M/H$ ).** The field dependent magnetization measurements (top) and the first derivative of magnetization ( $dM/dH$ ) versus magnetic field (bottom) at 2.0 K for single crystal sample of **2Dy** (green color) and **2Dy@2Y** (gray color). The solid green lines are the fits from POLY\_ANISO and the green dash line represents the result of fitting data multiplied by a coefficient of 0.96. Related to Figure 6 and STAR Methods.

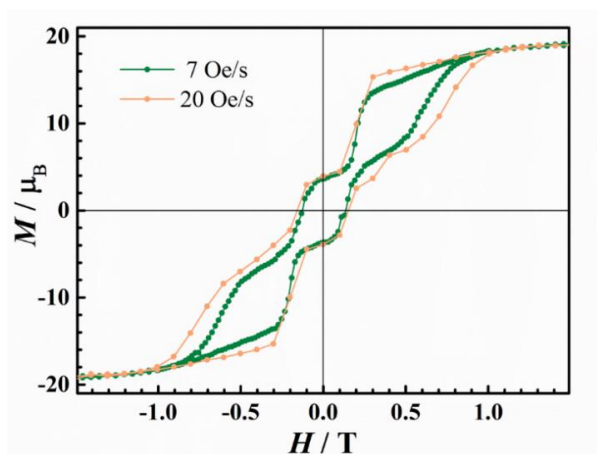

**Figure S43 The magnetic hysteresis loop measurements of 2Dy.** Magnetic hysteresis loop measurements for single crystal sample of **2Dy**. Related to Figure 6.

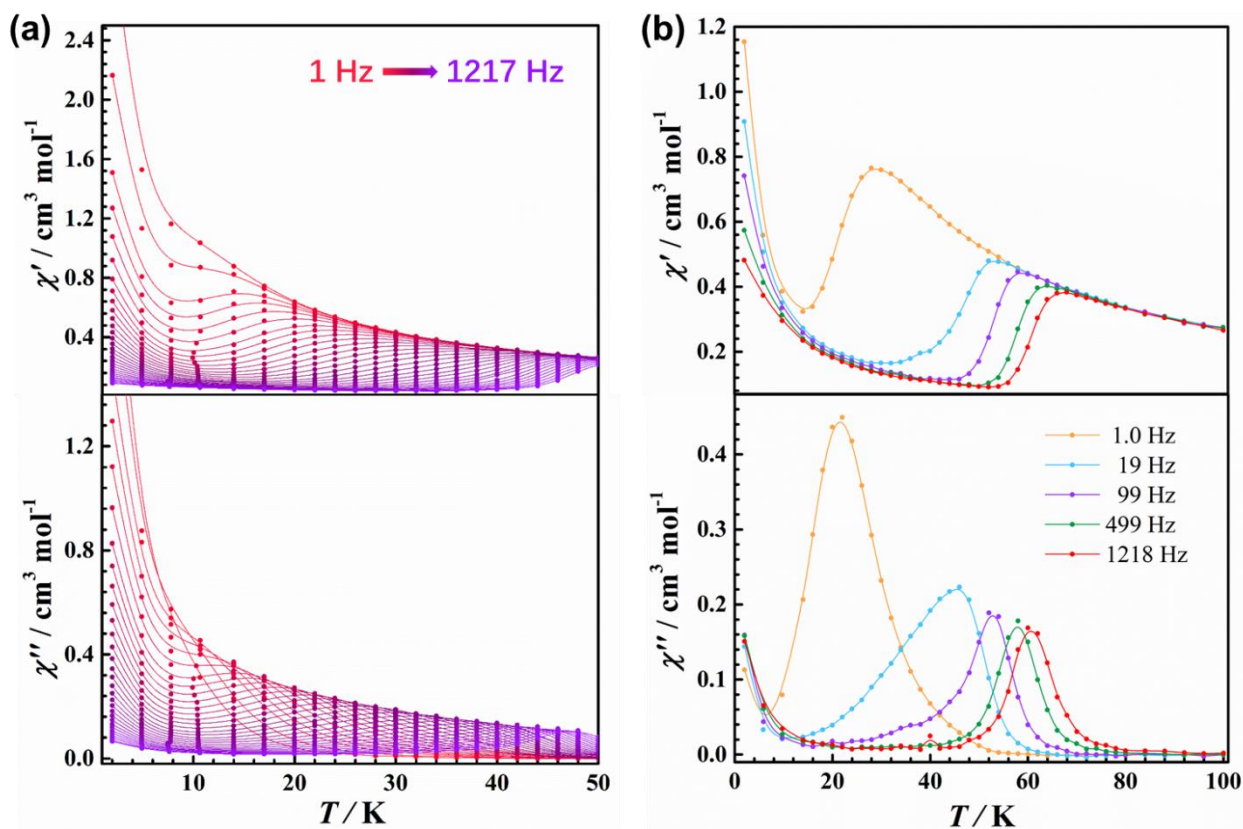

**Figure S44 The ac susceptibility measurements.** Variable-temperature magnetic susceptibility in-phase ( $\chi'$ , top) and out-of-phase ( $\chi''$ , bottom) for polycrystalline sample of **1Dy** (a) and **2Dy** (b), at zero DC field and an oscillating field of 3.5 Oe. Related to Figure 7.



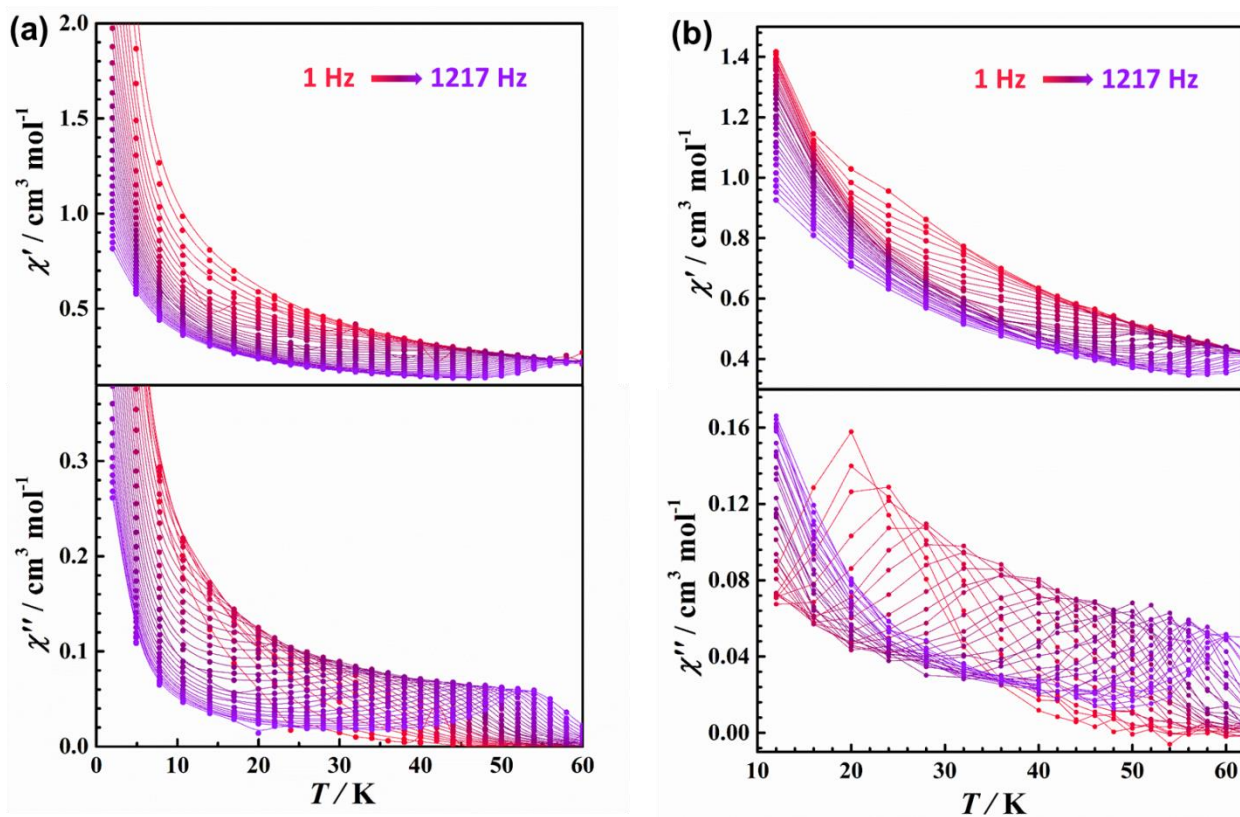

**Figure S45 The ac susceptibility measurements.** Variable-temperature magnetic susceptibility in-phase ( $\chi'$ , top) and out-of-phase ( $\chi''$ , bottom) for polycrystalline sample of **3Dy** (a) and **4Dy** (b), at zero DC field and an oscillating field of 3.5 Oe. Related to Figure 7.

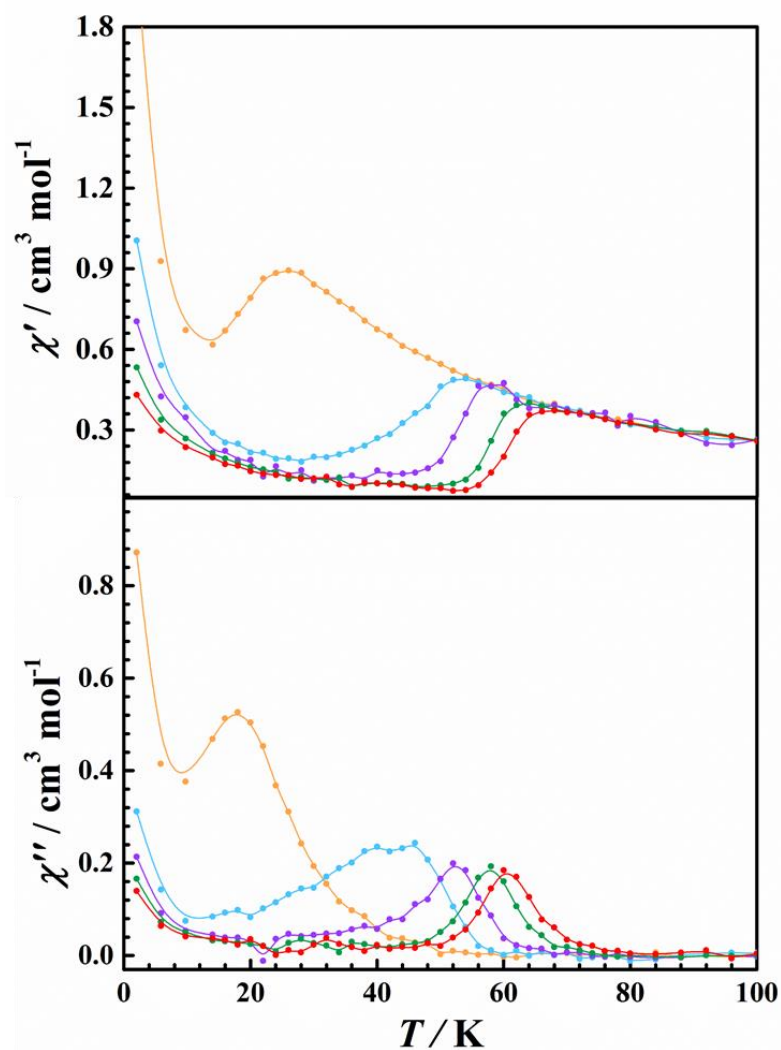

**Figure S46 The ac susceptibility measurements.** Variable-temperature magnetic susceptibility in-phase ( $\chi'$ , top) and out-of-phase ( $\chi''$ , bottom) for polycrystalline sample of **2Dy@2Y**, at zero DC field and an oscillating field of 3.5 Oe. Related to Figure 7.

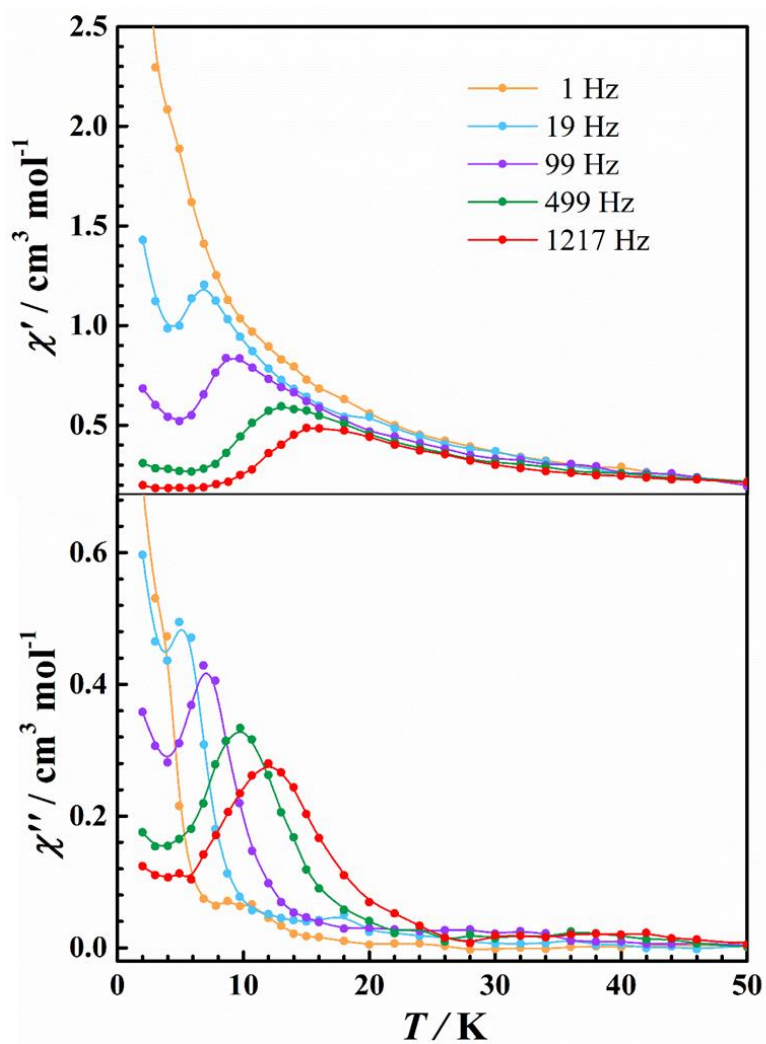

**Figure S47 The ac susceptibility measurements.** Variable-temperature magnetic susceptibility in-phase ( $\chi'$ , top) and out-of-phase ( $\chi''$ , bottom) for **5Dy@5Y**, in zero DC field and an oscillating field of 3.5 Oe. Related to Figure 7.

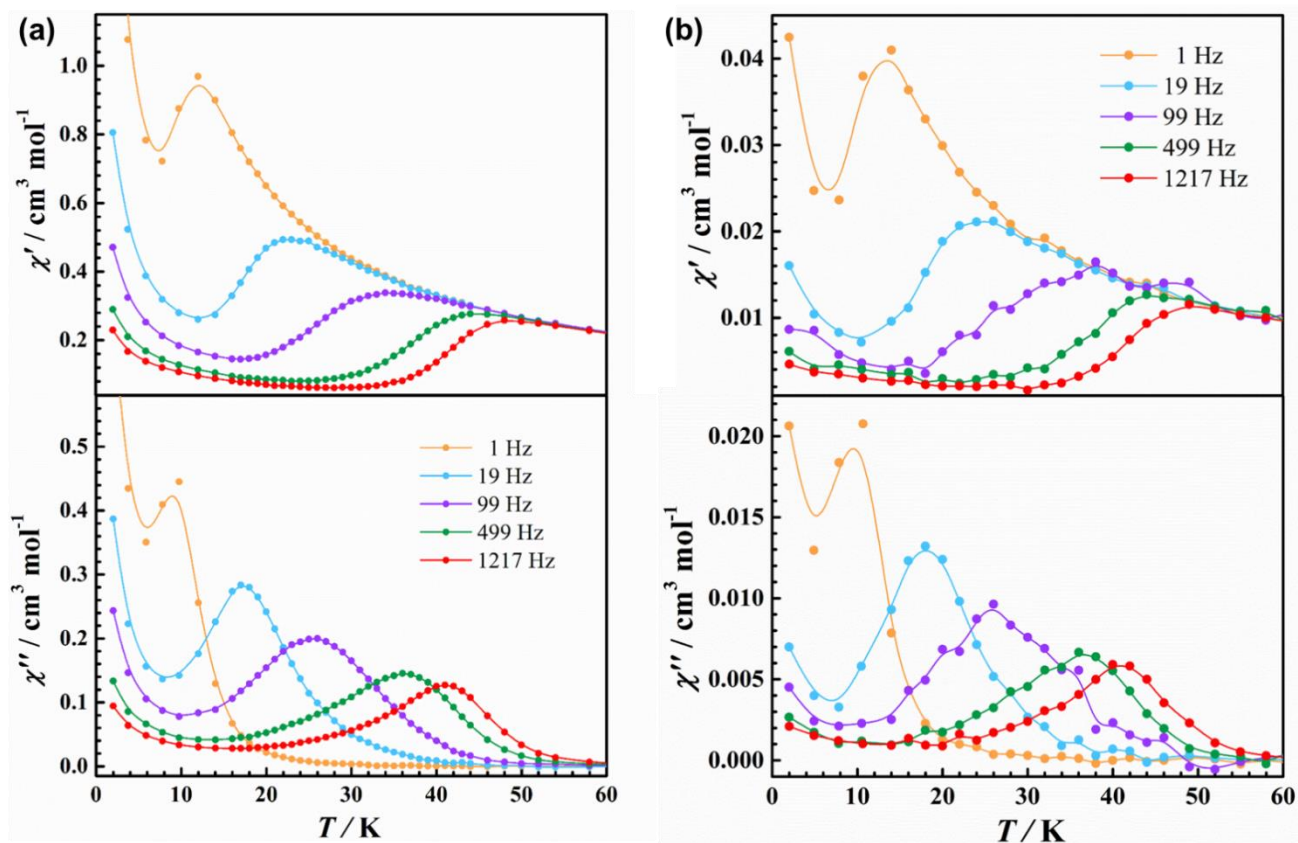

**Figure S48 The ac susceptibility measurements.** Variable-temperature magnetic susceptibility in-phase ( $\chi'$ , top) and out-of-phase ( $\chi''$ , bottom) for **6Dy** (a) and **6Dy@6Y** (b) in zero DC field and an oscillating field of 3.5 Oe. Related to Figure 7.

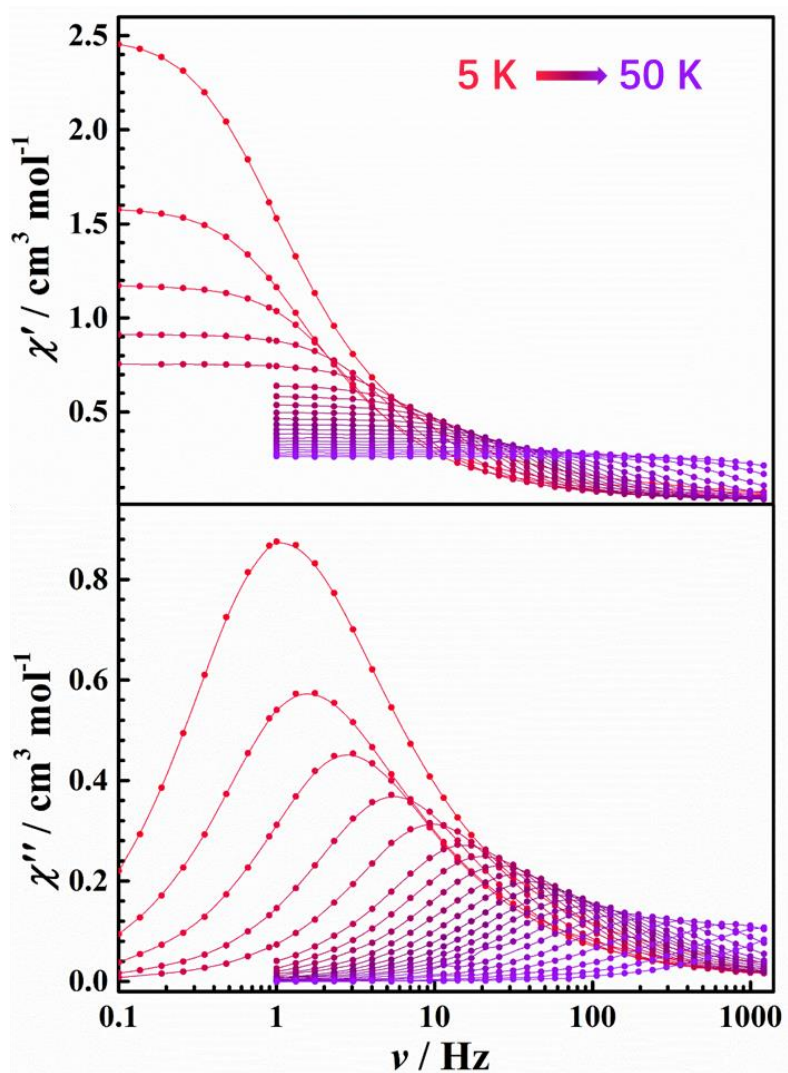

**Figure S49 The ac susceptibility measurements.** Frequency-dependence of the in-phase ( $\chi'$ , top) and out-of-phase ( $\chi''$ , bottom) ac susceptibility signals for polycrystalline sample of **1Dy** in zero DC field and an oscillating field of 3.5 Oe. Related to Figure 7.

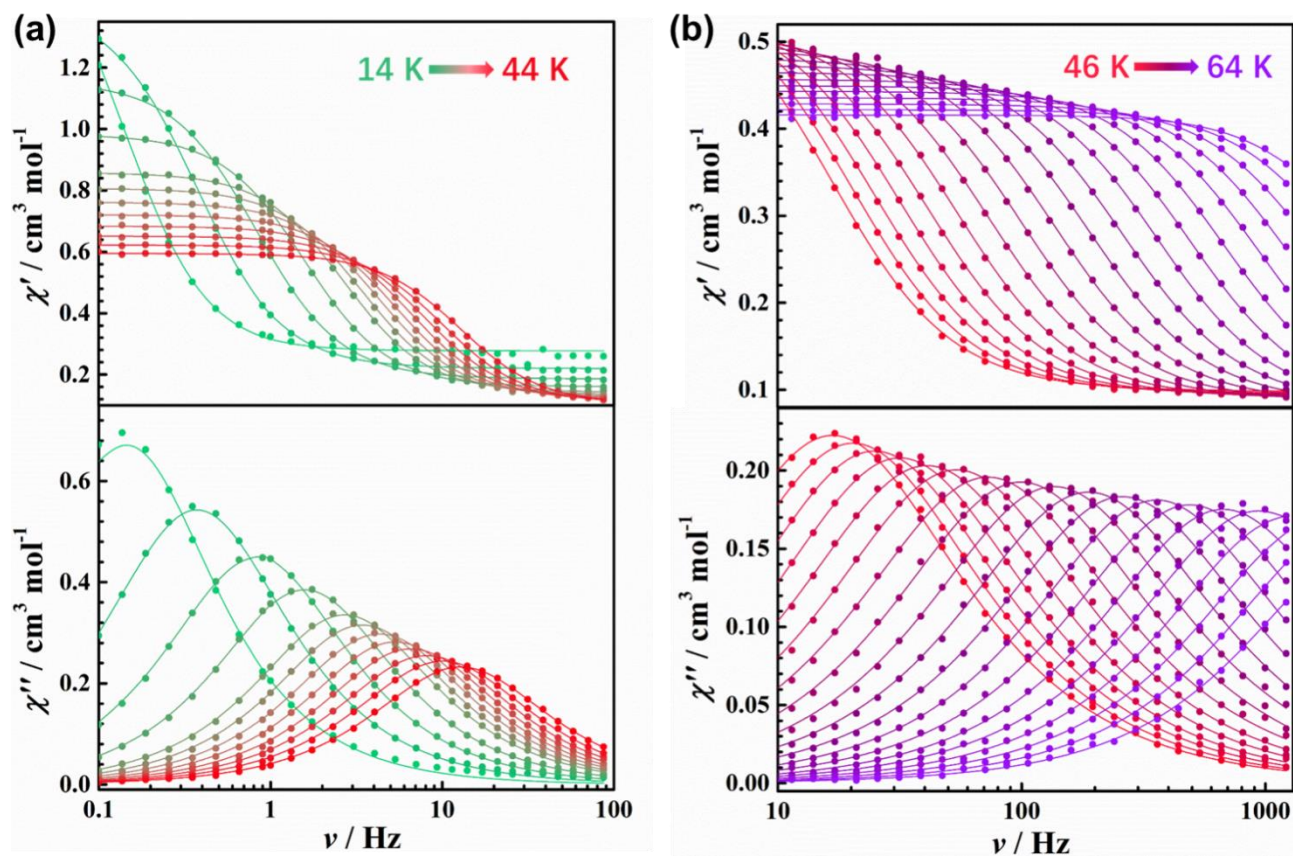

**Figure S50 The ac susceptibility measurements.** Frequency-dependence of the in-phase ( $\chi'$ , top) and out-of-phase ( $\chi''$ , bottom) ac susceptibility signals for polycrystalline sample of **2Dy** in zero DC field and an oscillating field of 3.5 Oe. Related to Figure 7.

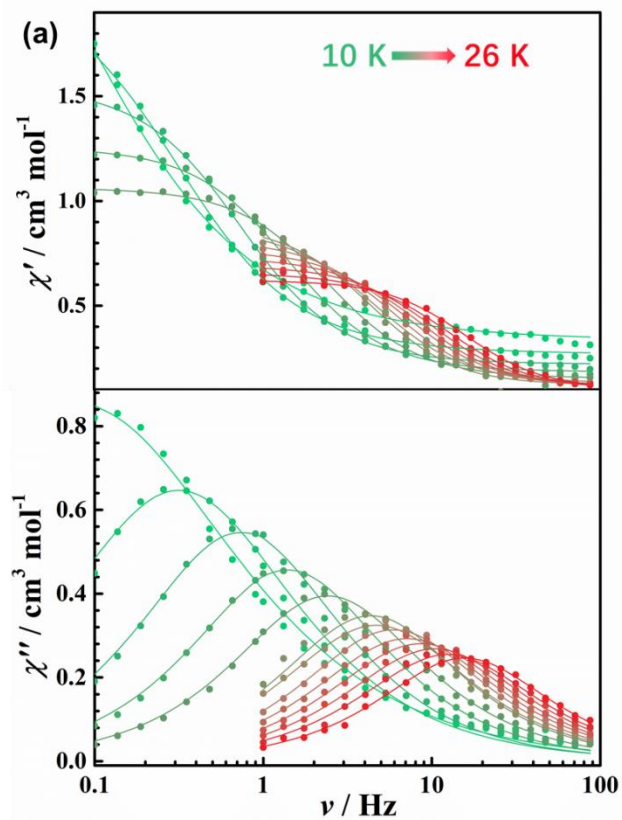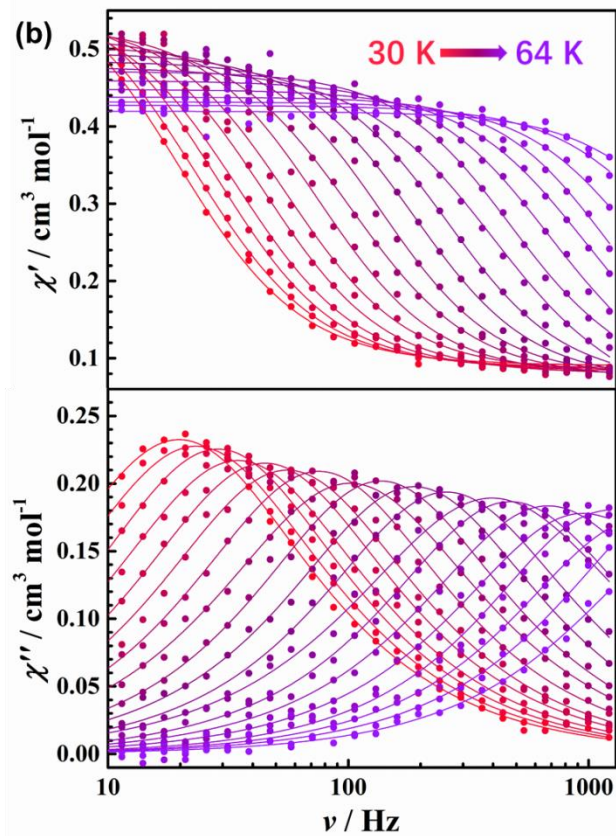

**Figure S51** The ac susceptibility measurements. Frequency-dependence of the in-phase ( $\chi'$ , top) and out-of-phase ( $\chi''$ , bottom) ac susceptibility signals for polycrystalline sample of **2Dy@2Y** in zero DC field and an oscillating field of 3.5 Oe. Related to Figure 7.

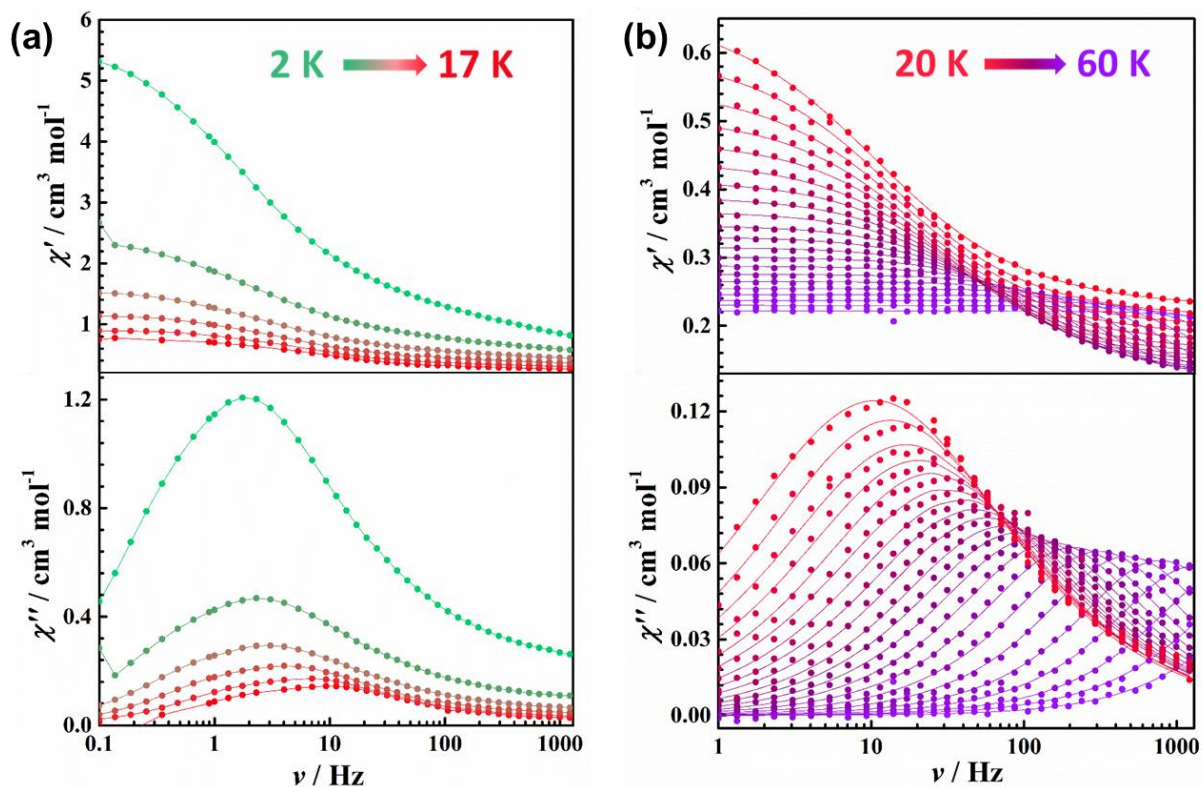

**Figure S52 The ac susceptibility measurements.** Frequency-dependence of the in-phase ( $\chi'$ , top) and out-of-phase ( $\chi''$ , bottom) ac susceptibility signals for polycrystalline sample of **3Dy** in zero DC field and an oscillating field of 3.5 Oe. Related to Figure 7.



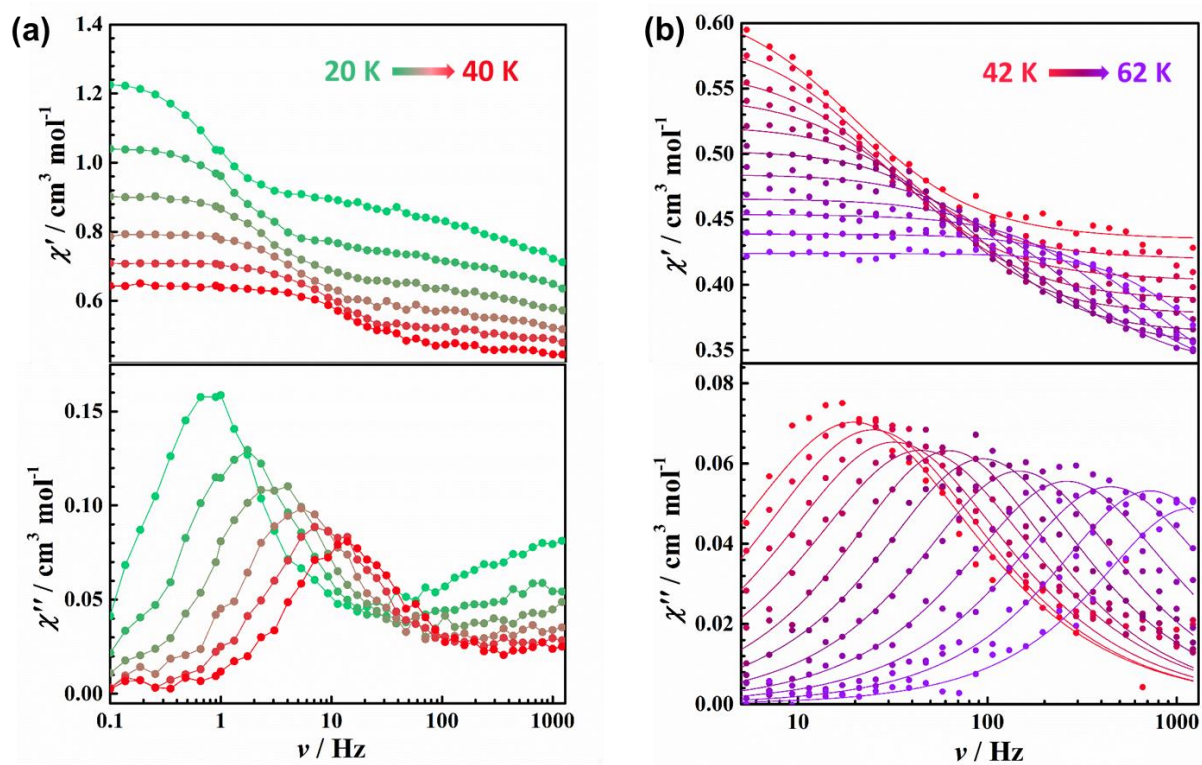

**Figure S53 The ac susceptibility measurements.** Frequency-dependence of the in-phase ( $\chi'$ , top) and out-of-phase ( $\chi''$ , bottom) ac susceptibility signals for polycrystalline sample of **4Dy** in zero DC field and an oscillating field of 3.5 Oe. Related to Figure 7.

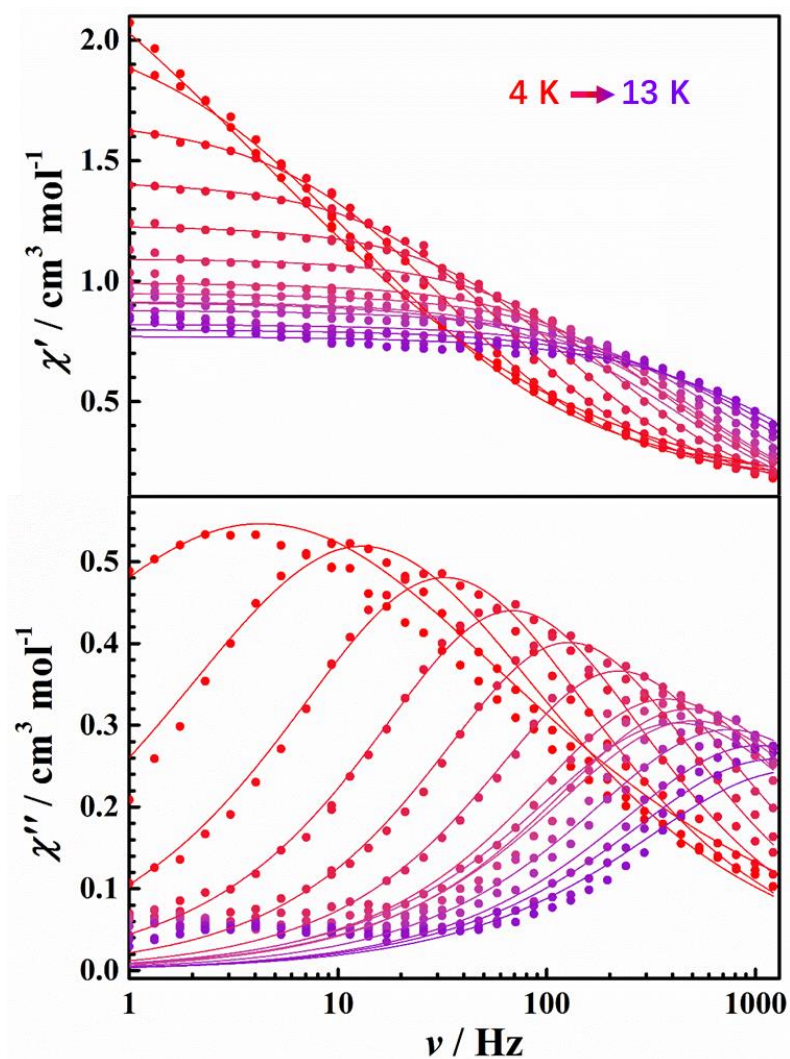

**Figure S54 The ac susceptibility measurements.** Frequency-dependence of the in-phase ( $\chi'$ , top) and out-of-phase ( $\chi''$ , bottom) ac susceptibility signals for **5Dy@5Y** in zero DC field and an oscillating field of 3.5 Oe. Related to Figure 7.

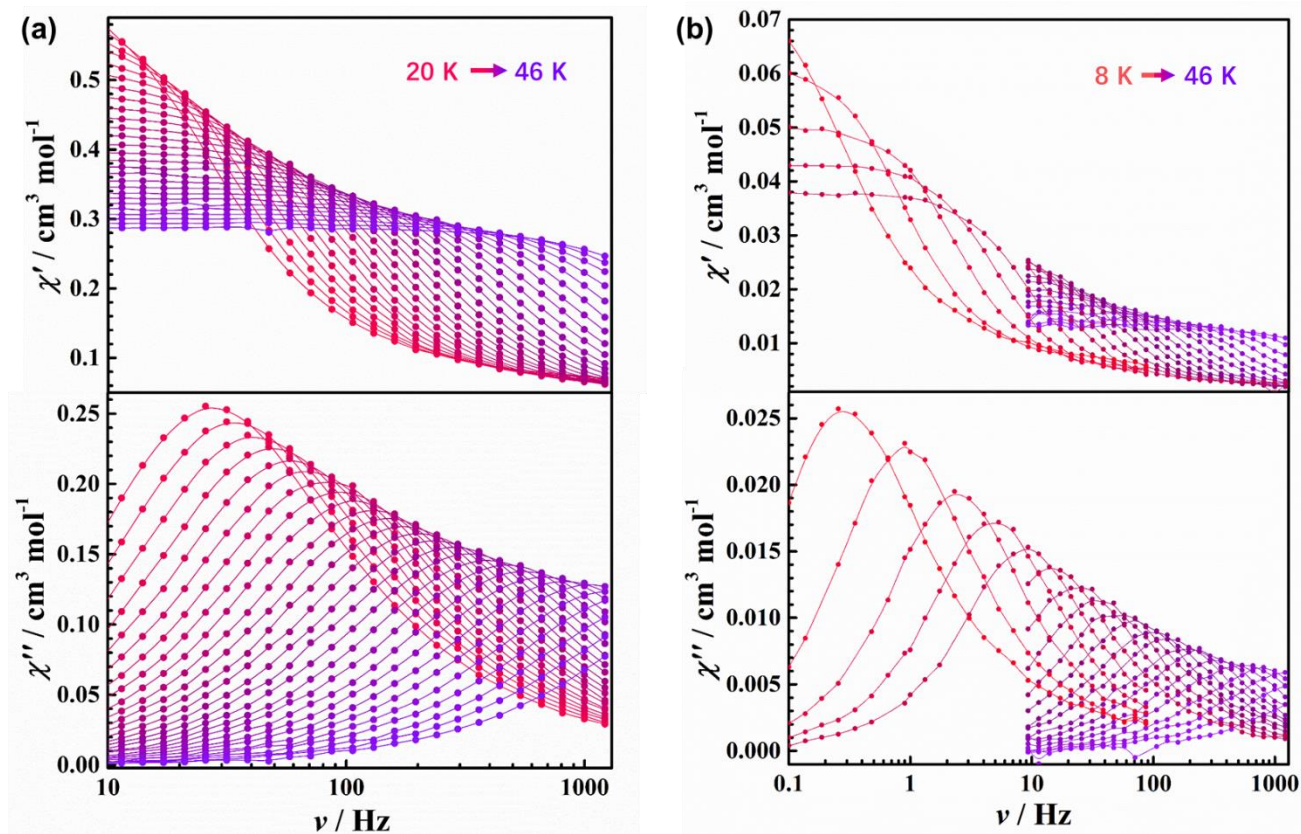

**Figure S55** The ac susceptibility measurements. Frequency dependence of  $\chi'$  and  $\chi''$  for **6Dy** (a) and **6Dy@6Y** (b) in zero DC field and an oscillating field of 3.5 Oe. Related to Figure 7.

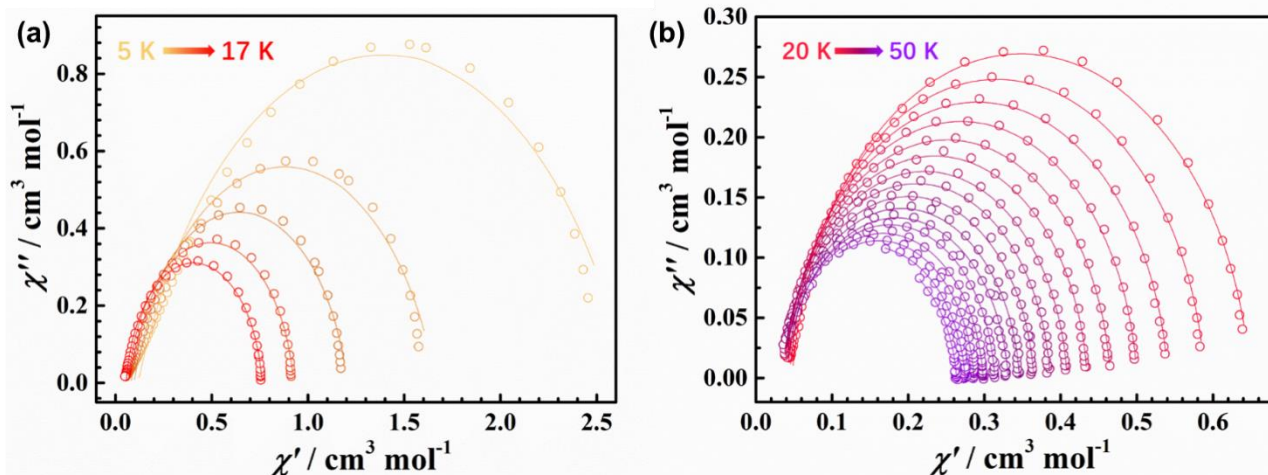

**Figure S56** The Cole-Cole plots using the frequency-dependence ac susceptibility data under zero DC field. The plots for polycrystalline sample of **1Dy** from 4.0 K to 13 K. Related to Figure 8.

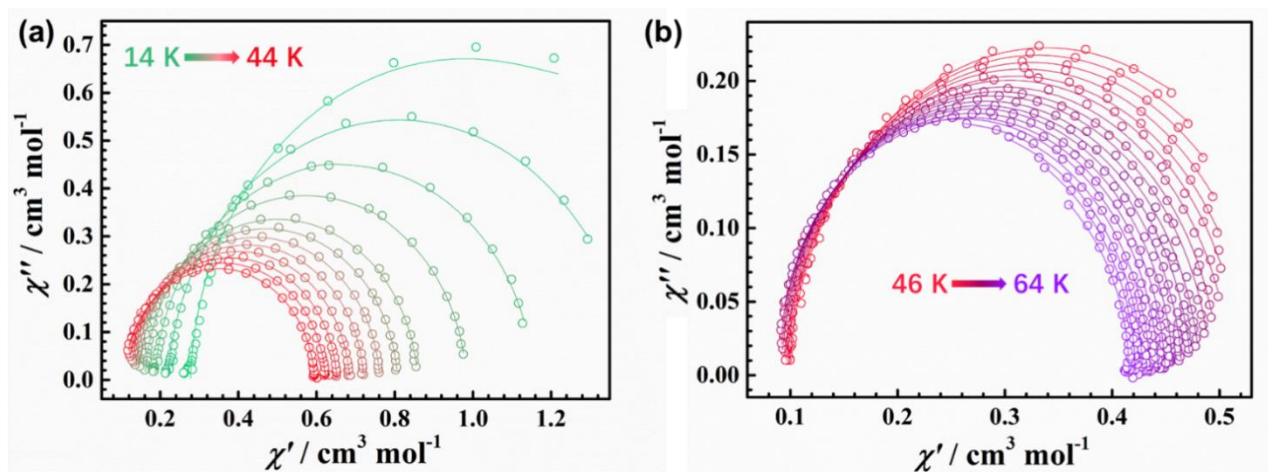

**Figure S57** The Cole-Cole plots using the frequency-dependence ac susceptibility data under zero DC field. The plots for polycrystalline sample of **2Dy** from 4.0 K to 13 K. Related to Figure 8.

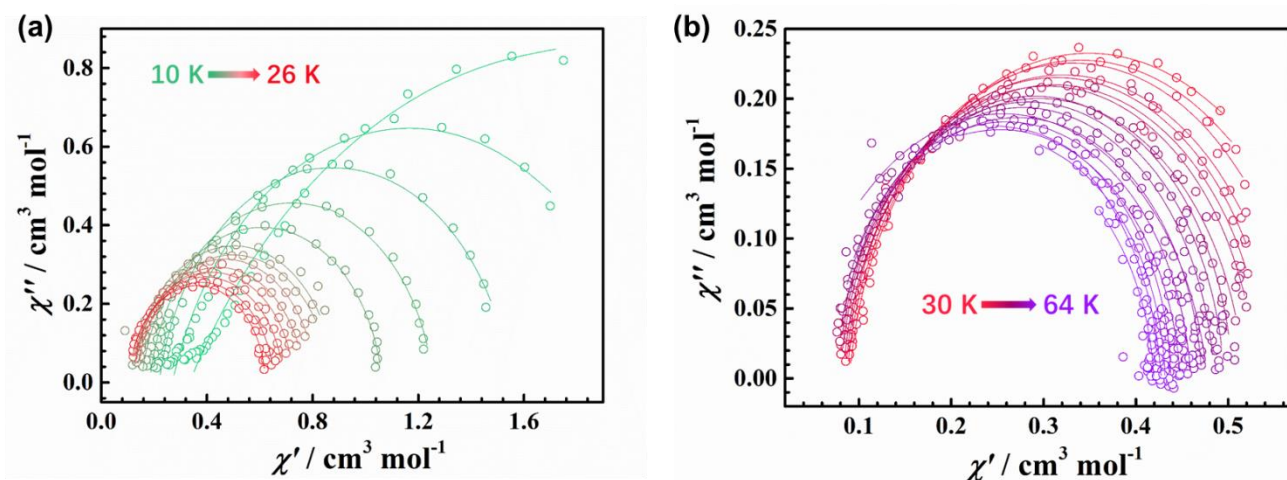

**Figure S58** The Cole-Cole plots using the frequency-dependence ac susceptibility data under zero DC field. The plots for polycrystalline sample of **2Dy@2Y** from 8 K to 18 K (left), and from 20 K to 46K (right). Related to Figure 8.

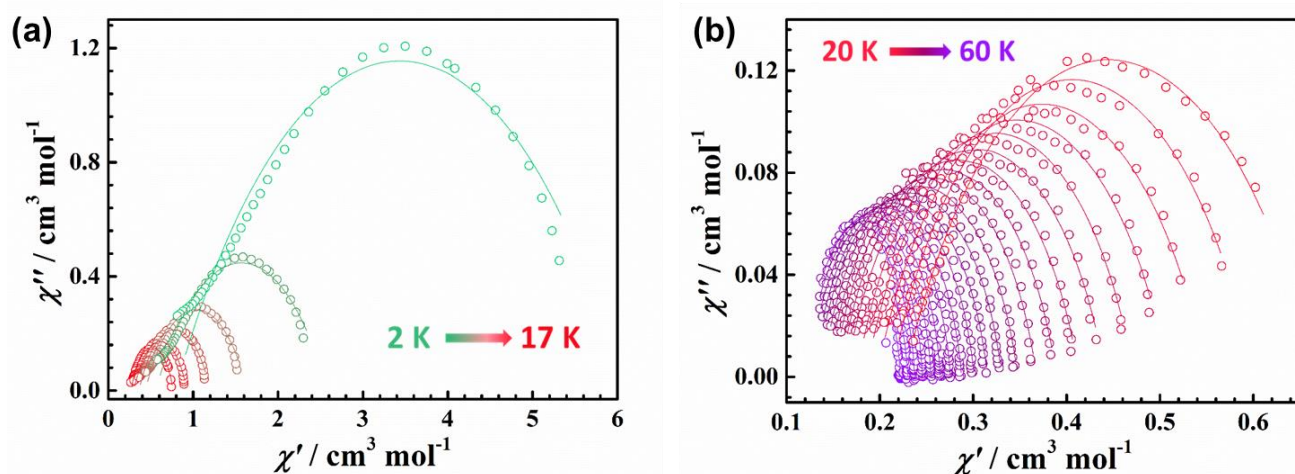

**Figure S59** The Cole-Cole plots using the frequency-dependence ac susceptibility data under zero DC field. The plots for polycrystalline sample of **3Dy** from 8 K to 18 K (left), and from 20 K to 46K (right). Related to Figure 8.

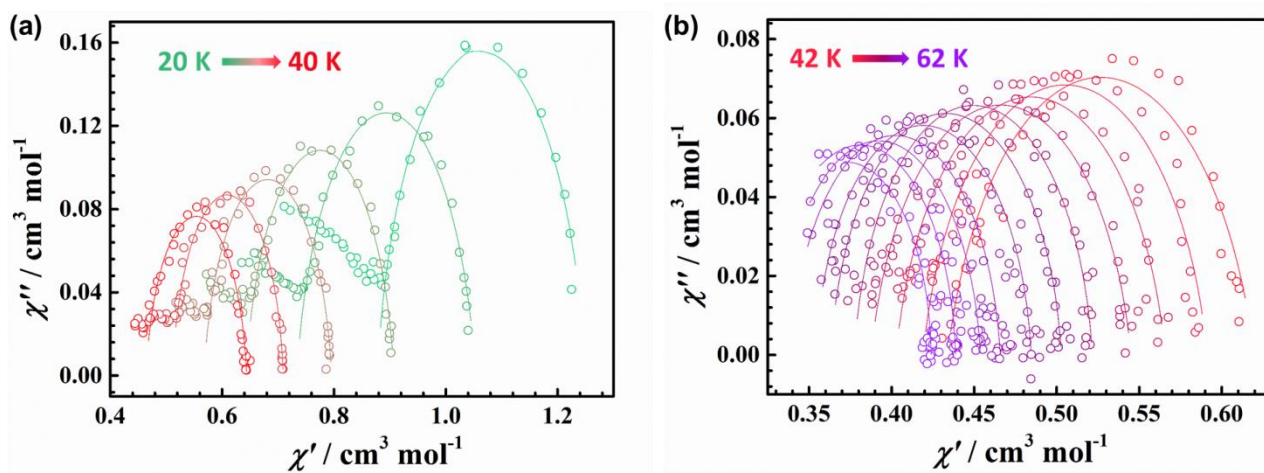

**Figure S60** The Cole-Cole plots using the frequency-dependence ac susceptibility data under zero DC field. The plots for polycrystalline sample of **4Dy** from 8 K to 18 K (left), and from 20 K to 46K (right). Related to Figure 8.

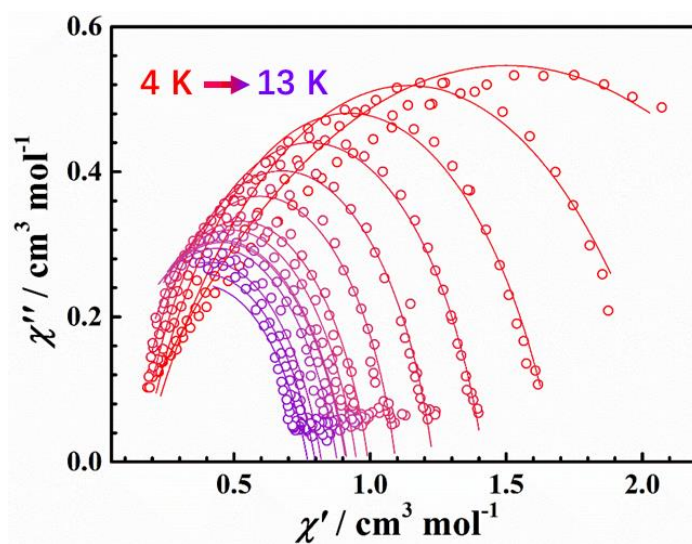

**Figure S61** The Cole-Cole plots using the frequency-dependence ac susceptibility data under zero DC field. The plots for **5Dy@5Y** from 4.0 K to 13 K. Related to Figure 8.

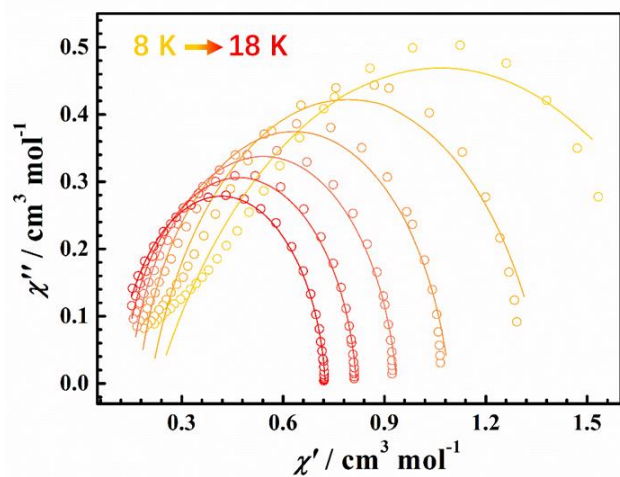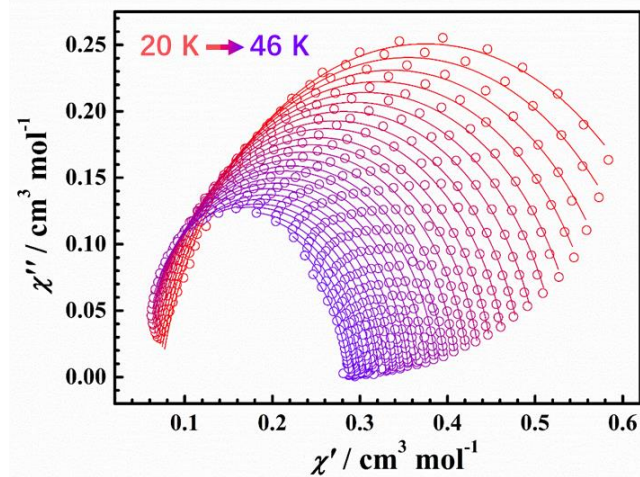

**Figure S62** The Cole-Cole plots using the frequency-dependence ac susceptibility data under zero DC field. The plots for **6Dy** from 8 K to 18 K (left), and from 20 K to 46K (right). Related to Figure 8.

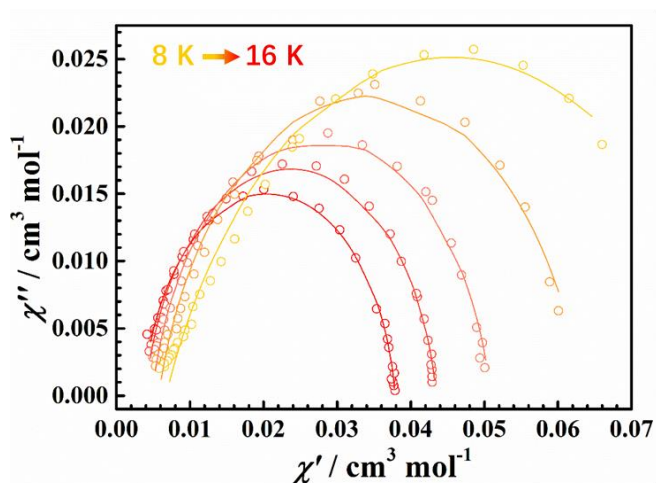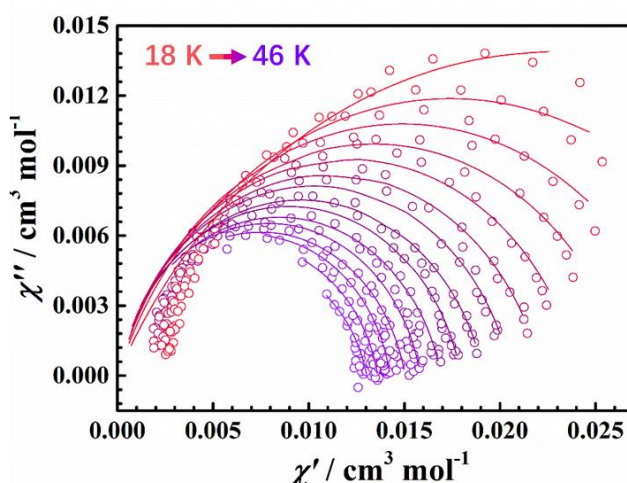

**Figure S63** The Cole-Cole plots using the frequency-dependence ac susceptibility data under zero DC field. The plots for **6Dy@6Y** from 8 K to 16 K (left), and from 18 K to 46K (right). Related to Figure 8.

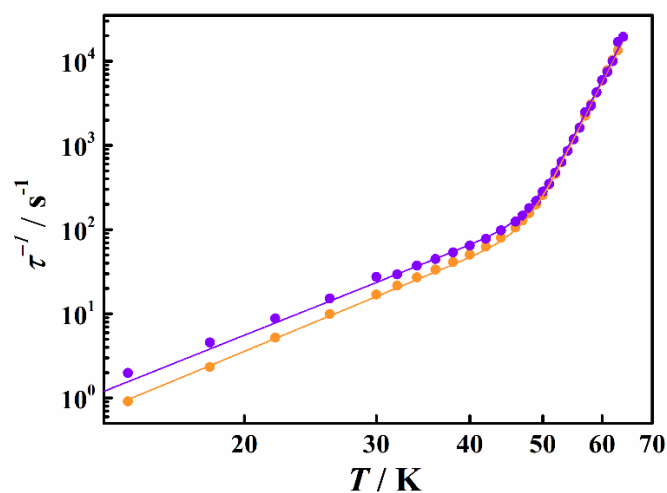

**Figure S64 The slow magnetic relaxation plots.** Plot of natural log of the inverse relaxation time vs. temperature for **2Dy** (orange) and **2Dy@2Y** (purple). The plots are from the ac susceptibility measurements. The solid lines are the best fit with equation 2, giving  $U_{\text{eff}} = 1089(6)$  K,  $\tau_0 = 2.4(1) \times 10^{-12}$  s,  $C = 5.5(2) \times 10^{-5} \text{ s}^{-1} \text{ K}^{-n}$  and  $n = 3.7(2)$  for **2Dy** and  $U_{\text{eff}} = 1089(6)$  K (Fixed),  $\tau_0 = 2.3(1) \times 10^{-12}$  s,  $C = 1.3(2) \times 10^{-4} \text{ s}^{-1} \text{ K}^{-n}$  and  $n = 3.56(2)$  for **2Dy@2Y** under zero dc magnetic field. Related to Figure 8.

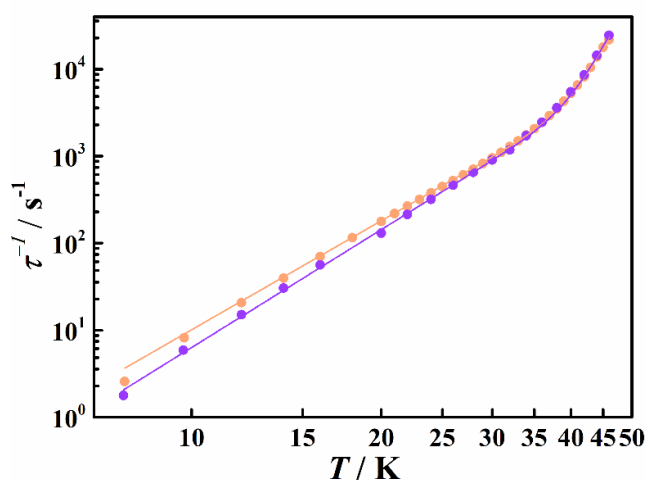

**Figure S65 The slow magnetic relaxation plots.** Plot of natural log of the inverse relaxation time vs. temperature for **6Dy** (orange) and **6Dy@6Y** (purple). The plots are from the ac susceptibility measurements. The solid lines are the best fit with equation 2, giving  $U_{\text{eff}} = 704(10)$  K,  $\tau_0 = 1.28(2) \times 10^{-11}$  s,  $C = 7.0(2) \times 10^{-4} \text{ s}^{-1} \text{ K}^{-n}$  and  $n = 4.16(2)$  for **6Dy** and  $U_{\text{eff}} = 704(10)$  K (Fixed),  $\tau_0 = 1.25(1) \times 10^{-11}$  s,  $C = 2.0(1) \times 10^{-4} \text{ s}^{-1} \text{ K}^{-n}$  and  $n = 4.5(1)$  for **6Dy@6Y** under zero dc magnetic field. Related to Figure 8.



**Table S8 Relaxation fitting parameters for 1Dy from Figure S56.** Related to Figure 8.

| $T / \text{K}$ | $\chi_{\text{S}} / \text{cm}^3 \text{mol}^{-1}$ | $\chi_{\text{T}} / \text{cm}^3 \text{mol}^{-1}$ | $\tau / \text{s}$ | $\alpha$ |
|----------------|-------------------------------------------------|-------------------------------------------------|-------------------|----------|
| 5              | 0.11764                                         | 2.65999                                         | 0.12435           | 0.24767  |
| 8              | 0.09556                                         | 1.66284                                         | 0.08503           | 0.20735  |
| 11             | 0.08095                                         | 1.20376                                         | 0.04931           | 0.14641  |
| 14             | 0.06598                                         | 0.92518                                         | 0.02637           | 0.10123  |
| 17             | 0.05549                                         | 0.76076                                         | 0.01566           | 0.07648  |
| 20             | 0.04756                                         | 0.64878                                         | 0.01005           | 0.06678  |
| 22             | 0.04438                                         | 0.58905                                         | 0.00771           | 0.0559   |
| 24             | 0.04156                                         | 0.54056                                         | 0.00606           | 0.05066  |
| 26             | 0.03911                                         | 0.50005                                         | 0.00481           | 0.04626  |
| 28             | 0.03746                                         | 0.46517                                         | 0.00387           | 0.04607  |
| 30             | 0.03629                                         | 0.43484                                         | 0.00314           | 0.04586  |
| 32             | 0.03484                                         | 0.40864                                         | 0.00258           | 0.05087  |
| 34             | 0.03509                                         | 0.38618                                         | 0.00211           | 0.04983  |
| 36             | 0.03718                                         | 0.36466                                         | 0.00173           | 0.04919  |
| 38             | 0.03715                                         | 0.34604                                         | 0.00137           | 0.05511  |
| 40             | 0.03916                                         | 0.33108                                         | 0.00101           | 0.05545  |
| 42             | 0.03876                                         | 0.31332                                         | 6.7602E-4         | 0.04457  |
| 44             | 0.03651                                         | 0.29817                                         | 3.96933E-4        | 0.05091  |
| 46             | 0.0362                                          | 0.28616                                         | 2.17807E-4        | 0.05435  |
| 48             | 0.03222                                         | 0.27458                                         | 1.11934E-4        | 0.06716  |
| 50             | 0.03937                                         | 0.26324                                         | 6.12609E-5        | 0.06039  |

**Table S9 Relaxation fitting parameters for 2Dy from Figure S57. Related to Figure 8.**

| $T / \text{K}$ | $\chi_{\text{S}} / \text{cm}^3 \text{mol}^{-1}$ | $\chi_{\text{T}} / \text{cm}^3 \text{mol}^{-1}$ | $\tau / \text{s}$ | $\alpha$ |
|----------------|-------------------------------------------------|-------------------------------------------------|-------------------|----------|
| 14             | 0.27756                                         | 1.68213                                         | 1.09635           | 0.01951  |
| 18             | 0.21959                                         | 1.40103                                         | 0.42718           | 0.04492  |
| 22             | 0.18571                                         | 1.15566                                         | 0.19227           | 0.04154  |
| 26             | 0.1602                                          | 0.9833                                          | 0.1007            | 0.03536  |
| 30             | 0.14238                                         | 0.85848                                         | 0.05893           | 0.03456  |
| 32             | 0.13475                                         | 0.8073                                          | 0.0464            | 0.03351  |
| 34             | 0.12791                                         | 0.76194                                         | 0.03689           | 0.03282  |
| 36             | 0.12256                                         | 0.721                                           | 0.0299            | 0.03075  |
| 38             | 0.11656                                         | 0.68408                                         | 0.02428           | 0.02888  |
| 40             | 0.11232                                         | 0.65174                                         | 0.01979           | 0.02956  |
| 42             | 0.10777                                         | 0.62278                                         | 0.01595           | 0.02963  |
| 44             | 0.10462                                         | 0.59511                                         | 0.01249           | 0.03001  |
| 46             | 0.098                                           | 0.57898                                         | 0.00947           | 0.0459   |
| 47             | 0.09616                                         | 0.56458                                         | 0.00782           | 0.04351  |
| 48             | 0.09434                                         | 0.55395                                         | 0.00638           | 0.04627  |
| 49             | 0.09303                                         | 0.54069                                         | 0.00503           | 0.04284  |
| 50             | 0.09078                                         | 0.53028                                         | 0.00389           | 0.04633  |
| 51             | 0.08947                                         | 0.52047                                         | 0.00294           | 0.04248  |
| 52             | 0.0879                                          | 0.51071                                         | 0.00219           | 0.04516  |
| 53             | 0.08681                                         | 0.49998                                         | 0.0016            | 0.04071  |
| 54             | 0.08592                                         | 0.49184                                         | 0.00117           | 0.0392   |
| 55             | 0.08502                                         | 0.48173                                         | 8.45494E-4        | 0.0365   |
| 56             | 0.08398                                         | 0.47359                                         | 6.12972E-4        | 0.0351   |
| 57             | 0.0846                                          | 0.4651                                          | 4.44719E-4        | 0.02761  |
| 58             | 0.08481                                         | 0.45688                                         | 3.23862E-4        | 0.02421  |
| 59             | 0.08504                                         | 0.44948                                         | 2.3674E-4         | 0.02127  |
| 60             | 0.07707                                         | 0.44334                                         | 1.70163E-4        | 0.028    |
| 61             | 0.08057                                         | 0.43564                                         | 1.28113E-4        | 0.02348  |
| 62             | 0.08355                                         | 0.42853                                         | 9.65619E-5        | 0.01993  |
| 63             | 0.09027                                         | 0.42185                                         | 7.46495E-5        | 0.01139  |

**Table S10 Relaxation fitting parameters for 2Dy@2Y from Figure S58. Related to Figure 8.**

| $T / \text{K}$ | $\chi_{\text{S}} / \text{cm}^3 \text{mol}^{-1}$ | $\chi_{\text{T}} / \text{cm}^3 \text{mol}^{-1}$ | $\tau / \text{s}$ | $\alpha$ |
|----------------|-------------------------------------------------|-------------------------------------------------|-------------------|----------|
| 10             | 0.33436                                         | 3.3472                                          | 1.9123            | 0.34444  |
| 14             | 0.26935                                         | 2.06146                                         | 0.50494           | 0.19934  |
| 18             | 0.2195                                          | 1.55057                                         | 0.2184            | 0.11915  |
| 22             | 0.1829                                          | 1.25732                                         | 0.11361           | 0.09726  |
| 26             | 0.15217                                         | 1.06434                                         | 0.06587           | 0.08597  |
| 30             | 0.12008                                         | 0.88502                                         | 0.03655           | 0.05453  |
| 32             | 0.13023                                         | 0.86869                                         | 0.034             | 0.07588  |
| 34             | 0.12064                                         | 0.81235                                         | 0.02689           | 0.05546  |
| 36             | 0.11781                                         | 0.77056                                         | 0.02231           | 0.06292  |
| 38             | 0.11078                                         | 0.73018                                         | 0.01867           | 0.05687  |
| 40             | 0.10488                                         | 0.69119                                         | 0.01543           | 0.05166  |
| 42             | 0.10267                                         | 0.65503                                         | 0.01285           | 0.04789  |
| 44             | 0.10391                                         | 0.6215                                          | 0.01019           | 0.02728  |
| 46             | 0.0899                                          | 0.60829                                         | 0.00805           | 0.06564  |
| 47             | 0.087                                           | 0.59339                                         | 0.00685           | 0.06433  |
| 48             | 0.08522                                         | 0.57759                                         | 0.00555           | 0.05217  |
| 49             | 0.08254                                         | 0.55928                                         | 0.00458           | 0.05612  |
| 50             | 0.07951                                         | 0.54912                                         | 0.00354           | 0.05206  |
| 51             | 0.08289                                         | 0.54018                                         | 0.00286           | 0.05063  |
| 52             | 0.07737                                         | 0.5303                                          | 0.00211           | 0.04732  |
| 53             | 0.07327                                         | 0.51731                                         | 0.00156           | 0.06225  |
| 54             | 0.07619                                         | 0.50454                                         | 0.00116           | 0.0338   |
| 55             | 0.07168                                         | 0.49562                                         | 8.47501E-4        | 0.04051  |
| 56             | 0.0696                                          | 0.48478                                         | 6.194E-4          | 0.04025  |
| 57             | 0.03596                                         | 0.47763                                         | 4.01618E-4        | 0.09489  |
| 58             | 0.07212                                         | 0.47144                                         | 3.36833E-4        | 0.03933  |
| 59             | 0.0598                                          | 0.45957                                         | 2.34379E-4        | 0.05078  |
| 60             | 0.05989                                         | 0.44807                                         | 1.68601E-4        | 0.05163  |
| 61             | 0.06969                                         | 0.43778                                         | 1.34695E-4        | 0.01138  |
| 62             | 0.07114                                         | 0.4318                                          | 9.97785E-5        | 0.02687  |
| 63             | 0.0041                                          | 0.42743                                         | 5.89493E-5        | 0.05594  |
| 64             | 0.05761                                         | 0.41959                                         | 5.15616E-5        | 0.0491   |

**Table S11 Relaxation fitting parameters for 3Dy from Figure S59.** Related to Figure 8.

| $2/ \text{K}$ | $\chi_{\text{S}} / \text{cm}^3 \text{mol}^{-1}$ | $\chi_{\text{T}} / \text{cm}^3 \text{mol}^{-1}$ | $\tau / \text{s}$ | $\alpha$ |
|---------------|-------------------------------------------------|-------------------------------------------------|-------------------|----------|
| 2             | 0.26807                                         | 0.76432                                         | 0.08153           | 0.30239  |
| 5             | 0.30366                                         | 0.92651                                         | 0.06292           | 0.35775  |
| 8             | 0.36201                                         | 1.20033                                         | 0.05054           | 0.39867  |
| 11            | 0.43554                                         | 1.63862                                         | 0.03879           | 0.43717  |
| 14            | 0.56084                                         | 2.57576                                         | 0.02674           | 0.46683  |
| 17            | 0.78827                                         | 6.07825                                         | 0.01913           | 0.47481  |
| 20            | 0.12944                                         | 0.22166                                         | 0.01526           | 0.04475  |
| 22            | 0.10068                                         | 0.23                                            | 0.01192           | 0.09407  |
| 24            | 0.10697                                         | 0.23722                                         | 0.00946           | 0.07472  |
| 26            | 0.11177                                         | 0.2457                                          | 0.00779           | 0.07943  |
| 28            | 0.11426                                         | 0.25484                                         | 0.00636           | 0.08516  |
| 30            | 0.11676                                         | 0.26487                                         | 0.00514           | 0.10217  |
| 32            | 0.1184                                          | 0.27559                                         | 0.00414           | 0.11969  |
| 34            | 0.1216                                          | 0.28762                                         | 0.00343           | 0.13992  |
| 36            | 0.12496                                         | 0.30105                                         | 0.00279           | 0.15929  |
| 38            | 0.12897                                         | 0.31531                                         | 0.0022            | 0.18014  |
| 40            | 0.13226                                         | 0.33082                                         | 0.00175           | 0.19903  |
| 42            | 0.13818                                         | 0.3478                                          | 0.00138           | 0.21097  |
| 44            | 0.14398                                         | 0.36793                                         | 0.00104           | 0.22414  |
| 46            | 0.14983                                         | 0.3894                                          | 7.55609E-4        | 0.23952  |
| 48            | 0.1567                                          | 0.41355                                         | 5.12736E-4        | 0.25281  |
| 50            | 0.16329                                         | 0.44165                                         | 3.35031E-4        | 0.27228  |
| 52            | 0.17509                                         | 0.47214                                         | 2.04301E-4        | 0.27141  |
| 54            | 0.18478                                         | 0.50915                                         | 1.22785E-4        | 0.29167  |
| 56            | 0.19659                                         | 0.55045                                         | 6.92201E-5        | 0.30725  |
| 58            | 0.21196                                         | 0.60015                                         | 3.76865E-5        | 0.31081  |
| 60            | 0.22634                                         | 0.66454                                         | 3.24435E-5        | 0.34208  |

**Table S12 Relaxation fitting parameters for 4Dy from Figure S60.** Related to Figure 8.

| $T / \text{K}$ | $\chi_S / \text{cm}^3 \text{mol}^{-1}$ | $\chi_T / \text{cm}^3 \text{mol}^{-1}$ | $\tau / \text{s}$ | $\alpha$ |
|----------------|----------------------------------------|----------------------------------------|-------------------|----------|
| 20             | 0.87809                                | 1.24936                                | 0.199             | 0.10573  |
| 24             | 0.73342                                | 1.05354                                | 0.09309           | 0.1453   |
| 28             | 0.64286                                | 0.90763                                | 0.05322           | 0.1223   |
| 32             | 0.5677                                 | 0.79595                                | 0.02894           | 0.11615  |
| 36             | 0.51144                                | 0.70935                                | 0.01775           | 0.07852  |
| 40             | 0.46433                                | 0.64406                                | 0.01083           | 0.0993   |
| 42             | 0.43403                                | 0.61939                                | 0.00807           | 0.17131  |
| 44             | 0.41912                                | 0.59121                                | 0.00642           | 0.14224  |
| 46             | 0.40278                                | 0.56574                                | 0.00497           | 0.13679  |
| 48             | 0.38777                                | 0.54493                                | 0.00359           | 0.13395  |
| 50             | 0.37748                                | 0.52155                                | 0.00254           | 0.07975  |
| 52             | 0.36313                                | 0.5028                                 | 0.00169           | 0.08063  |
| 54             | 0.35407                                | 0.48451                                | 0.00109           | 0.06985  |
| 56             | 0.3388                                 | 0.46584                                | 6.06035E-4        | 0.08144  |
| 58             | 0.33035                                | 0.45385                                | 3.59034E-4        | 0.07933  |
| 60             | 0.32361                                | 0.43877                                | 2.20183E-4        | 0.04675  |
| 62             | 0.32239                                | 0.42398                                | 1.36368E-4        | 0.02201  |

**Table S13 Relaxation fitting parameters for 5Dy@5Y from Figure S61.** Related to Figure 8.

| $T / \text{K}$ | $\chi_S / \text{cm}^3 \text{mol}^{-1}$ | $\chi_T / \text{cm}^3 \text{mol}^{-1}$ | $\tau / \text{s}$ | $\alpha$ |
|----------------|----------------------------------------|----------------------------------------|-------------------|----------|
| 4              | 0.16156                                | 1.68409                                | 0.0049            | 0.28153  |
| 4.9            | 0.14622                                | 1.41789                                | 0.00232           | 0.2275   |
| 5.88           | 0.12387                                | 1.23175                                | 0.00125           | 0.19984  |
| 6.83           | 0.09827                                | 1.0938                                 | 7.18059E-4        | 0.19031  |
| 7.81           | 0.05099                                | 0.99332                                | 4.26672E-4        | 0.21654  |
| 8.76           | 0.02512                                | 0.95047                                | 3.30228E-4        | 0.22818  |
| 9.7            | 5.48317E-14                            | 0.9162                                 | 3.16071E-4        | 0.24991  |
| 10.21          | 6.67809E-14                            | 0.91235                                | 3.76711E-4        | 0.25246  |
| 11.16          | 1.08594E-13                            | 0.87936                                | 2.13138E-4        | 0.24681  |
| 12             | 1.95885E-13                            | 0.82127                                | 1.55663E-4        | 0.24695  |
| 12.5           | 2.9751E-13                             | 0.79881                                | 1.30362E-4        | 0.26774  |
| 13             | 4.357E-13                              | 0.77161                                | 1.07108E-4        | 0.28234  |

**Table S14 Relaxation fitting parameters for 6Dy from Figure S62.** Related to Figure 8.

| $T / \text{K}$ | $\chi_s / \text{cm}^3 \text{mol}^{-1}$ | $\chi_T / \text{cm}^3 \text{mol}^{-1}$ | $\tau / \text{s}$ | $\alpha$ |
|----------------|----------------------------------------|----------------------------------------|-------------------|----------|
| 7.83           | 0.22663                                | 1.90662                                | 0.38756           | 0.34908  |
| 9.73           | 0.20727                                | 1.37245                                | 0.12209           | 0.19797  |
| 12             | 0.1722                                 | 1.09252                                | 0.04839           | 0.12511  |
| 14             | 0.14708                                | 0.93601                                | 0.02528           | 0.09308  |
| 16             | 0.1268                                 | 0.81658                                | 0.01423           | 0.07249  |
| 18             | 0.10956                                | 0.72472                                | 0.00865           | 0.05997  |
| 20             | 0.07243                                | 0.67798                                | 0.00563           | 0.11646  |
| 21             | 0.06953                                | 0.6405                                 | 0.00457           | 0.10576  |
| 22             | 0.067                                  | 0.60605                                | 0.00375           | 0.09473  |
| 23             | 0.06397                                | 0.5776                                 | 0.00314           | 0.08838  |
| 24             | 0.06182                                | 0.55169                                | 0.00264           | 0.08194  |
| 25             | 0.05916                                | 0.52819                                | 0.00224           | 0.0766   |
| 26             | 0.05771                                | 0.50643                                | 0.00191           | 0.06993  |
| 27             | 0.05548                                | 0.48749                                | 0.00164           | 0.06889  |
| 28             | 0.05406                                | 0.46984                                | 0.00141           | 0.06407  |
| 29             | 0.05216                                | 0.45309                                | 0.00122           | 0.06421  |
| 30             | 0.05097                                | 0.43813                                | 0.00105           | 0.06145  |
| 31             | 0.04926                                | 0.4244                                 | 9.06508E-4        | 0.06133  |
| 32             | 0.04692                                | 0.41117                                | 7.77495E-4        | 0.06349  |
| 33             | 0.04601                                | 0.39823                                | 6.66508E-4        | 0.06182  |
| 34             | 0.04511                                | 0.38786                                | 5.71306E-4        | 0.06006  |
| 35             | 0.04353                                | 0.37647                                | 4.83941E-4        | 0.06247  |
| 36             | 0.04306                                | 0.36578                                | 4.09886E-4        | 0.06028  |
| 37             | 0.04061                                | 0.35606                                | 3.42859E-4        | 0.06418  |
| 38             | 0.04147                                | 0.34685                                | 2.86911E-4        | 0.06438  |
| 39             | 0.03783                                | 0.33834                                | 2.3415E-4         | 0.07023  |
| 40             | 0.03658                                | 0.32996                                | 1.90651E-4        | 0.0722   |
| 41             | 0.03267                                | 0.32239                                | 1.52398E-4        | 0.07641  |
| 42             | 0.03334                                | 0.31489                                | 1.22241E-4        | 0.07967  |
| 43             | 0.03107                                | 0.30781                                | 9.59183E-5        | 0.08246  |
| 44             | 0.02574                                | 0.30073                                | 7.26615E-5        | 0.08841  |
| 45             | 0.02405                                | 0.29433                                | 5.61588E-5        | 0.09308  |
| 46             | 0.03504                                | 0.28763                                | 4.5974E-5         | 0.08907  |

**Table S15 Relaxation fitting parameters for 6Dy@6Y from Figure S63.** Related to Figure 8.

| $T / \text{K}$ | $\chi_{\text{S}} / \text{cm}^3 \text{mol}^{-1}$ | $\chi_{\text{T}} / \text{cm}^3 \text{mol}^{-1}$ | $\tau / \text{s}$ | $\alpha$ |
|----------------|-------------------------------------------------|-------------------------------------------------|-------------------|----------|
| 7.8            | 0.00674                                         | 0.08432                                         | 0.56189           | 0.26432  |
| 9.7            | 0.00574                                         | 0.06327                                         | 0.16947           | 0.16002  |
| 12             | 0.00488                                         | 0.05085                                         | 0.06634           | 0.11741  |
| 14             | 0.00398                                         | 0.04343                                         | 0.03274           | 0.09522  |
| 16             | 1.9182E-24                                      | 0.04564                                         | 0.0175            | 0.30378  |
| 20             | 1.95816E-23                                     | 0.03482                                         | 0.00769           | 0.23628  |
| 22             | 3.1756E-23                                      | 0.02984                                         | 0.00467           | 0.20114  |
| 24             | 5.94493E-23                                     | 0.02682                                         | 0.00314           | 0.18674  |
| 26             | 6.53855E-18                                     | 0.0242                                          | 0.00216           | 0.16588  |
| 28             | 5.09343E-18                                     | 0.0222                                          | 0.00154           | 0.15818  |
| 30             | 7.85275E-18                                     | 0.0206                                          | 0.00111           | 0.14716  |
| 32             | 9.14172E-18                                     | 0.01916                                         | 8.49135E-4        | 0.14985  |
| 34             | 1.85246E-17                                     | 0.01796                                         | 5.8159E-4         | 0.13263  |
| 36             | 2.84999E-17                                     | 0.01692                                         | 4.07673E-4        | 0.13647  |
| 38             | 3.81425E-17                                     | 0.01584                                         | 2.7852E-4         | 0.11989  |
| 40             | 5.361E-17                                       | 0.01504                                         | 1.82873E-4        | 0.12449  |
| 42             | 7.1003E-17                                      | 0.01425                                         | 1.16444E-4        | 0.10558  |
| 44             | 1.04145E-16                                     | 0.01361                                         | 6.9486E-5         | 0.12164  |
| 46             | 6.3171E-4                                       | 0.01304                                         | 4.09291E-5        | 0.14488  |



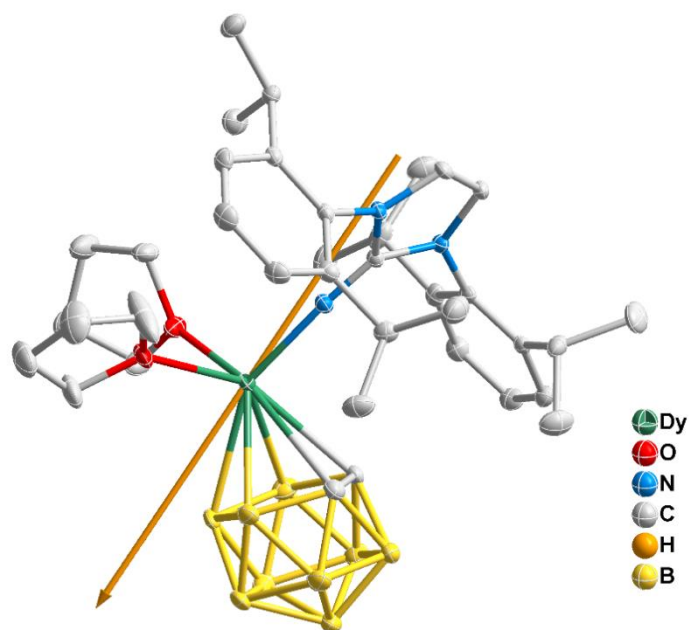

**Figure S66** The local principal magnetization of the ground Kramer's doublet of 1Dy. Related to STAR Methods.

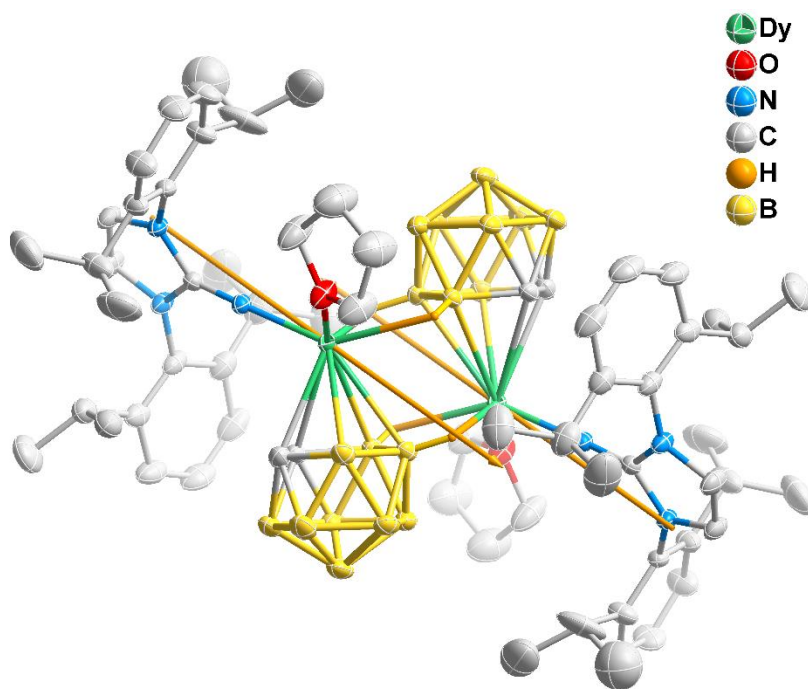

**Figure S67** The local principal magnetizations of the ground Kramer's doublet of 2Dy. Related to STAR Methods.

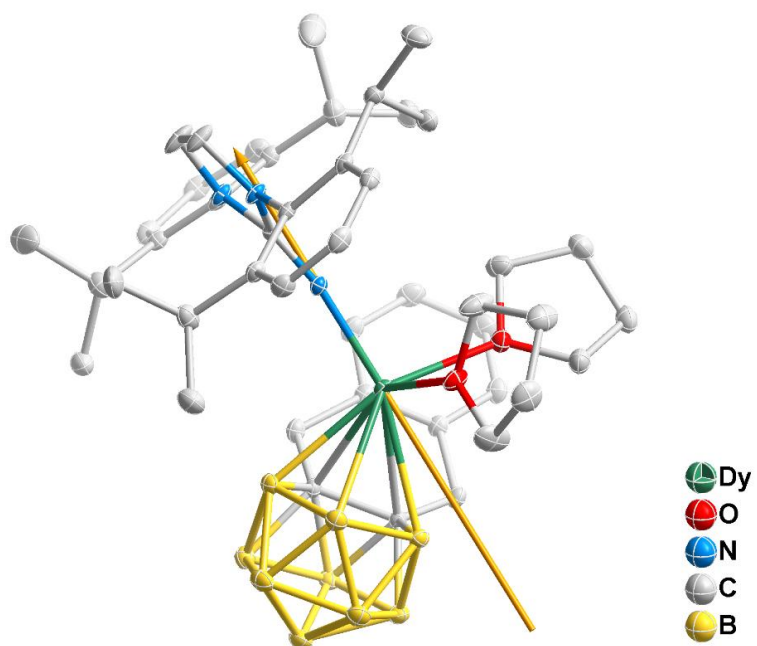

**Figure S68** The local principal magnetizations of the ground Kramer's doublet of 3Dy. Related to STAR Methods.

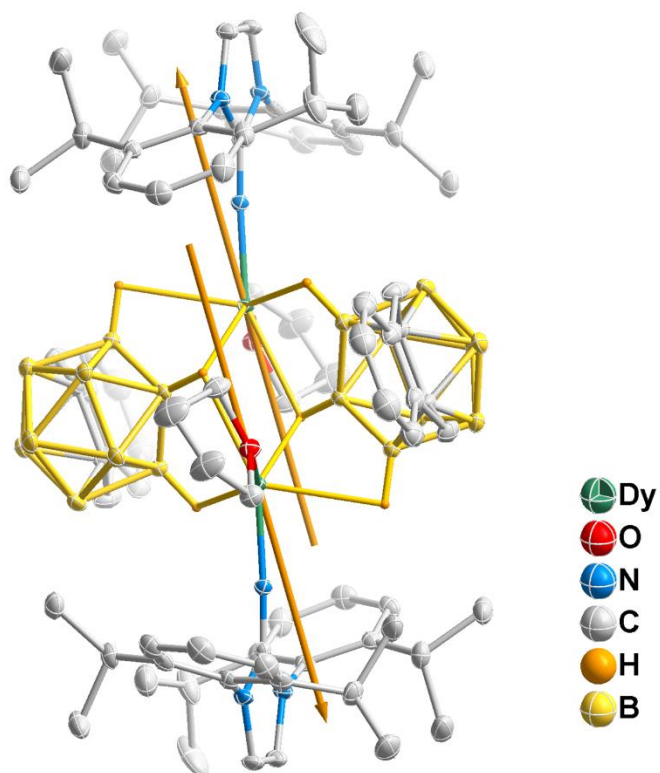

**Figure S69** The local principal magnetizations of the ground Kramer's doublet of 4Dy. Related to STAR Methods.

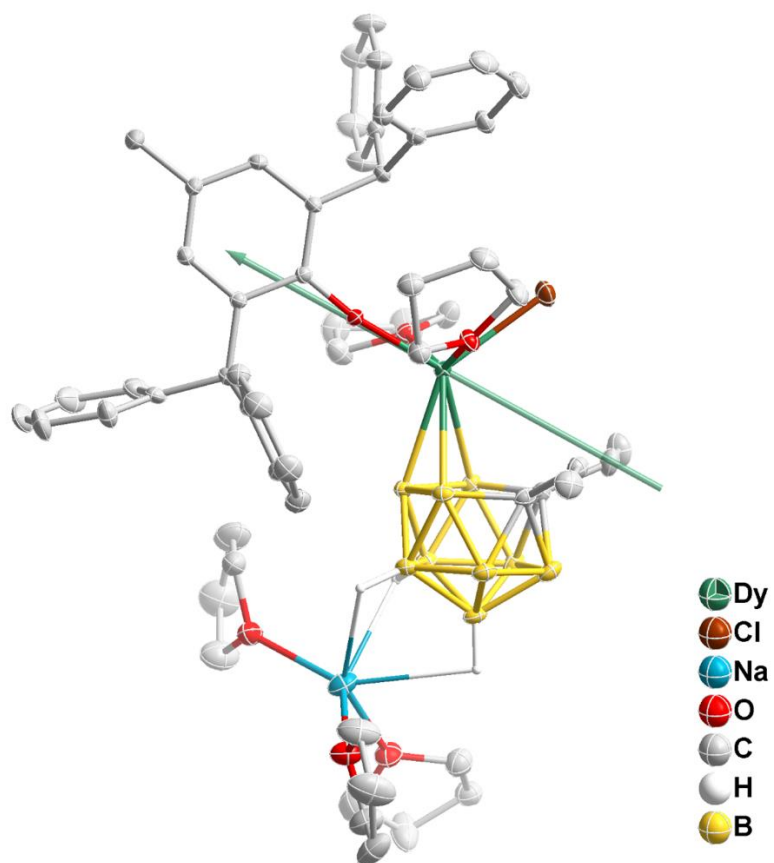

**Figure S70** The local principal magnetizations of the ground Kramer's doublet of  $5Dy$ . Related to STAR Methods.

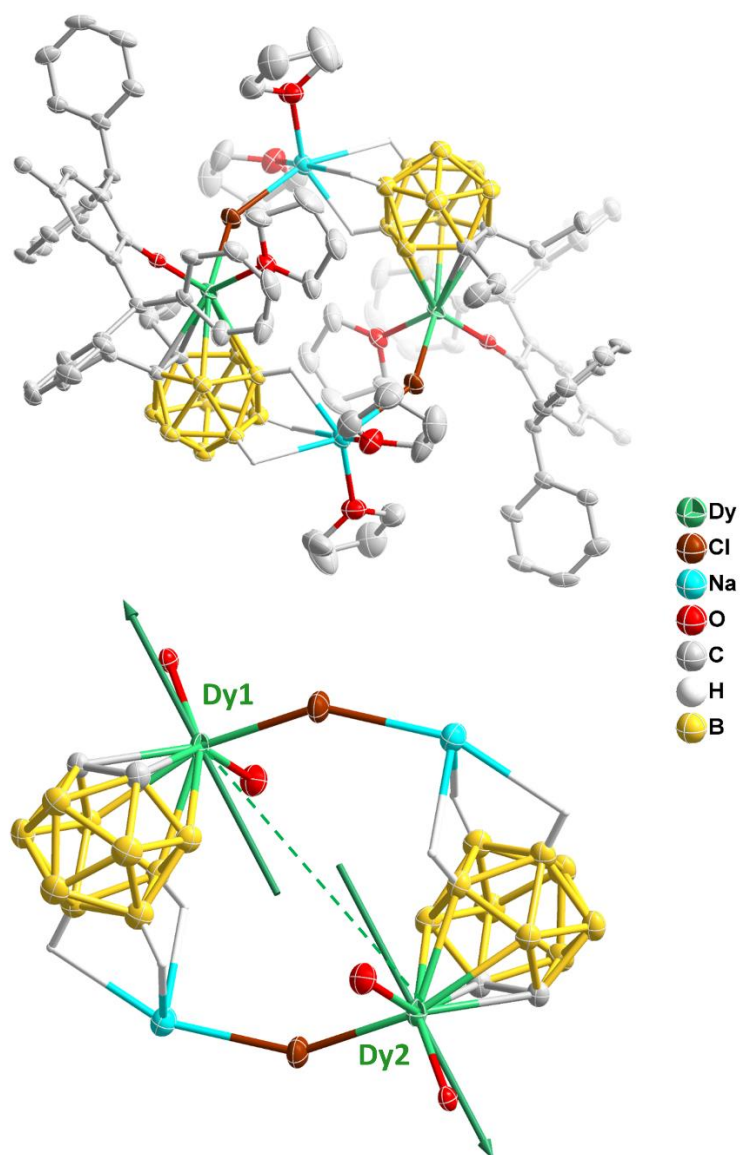

**Figure S71** The local principal magnetizations of the ground Kramer's doublet of 6Dy. Related to STAR Methods.

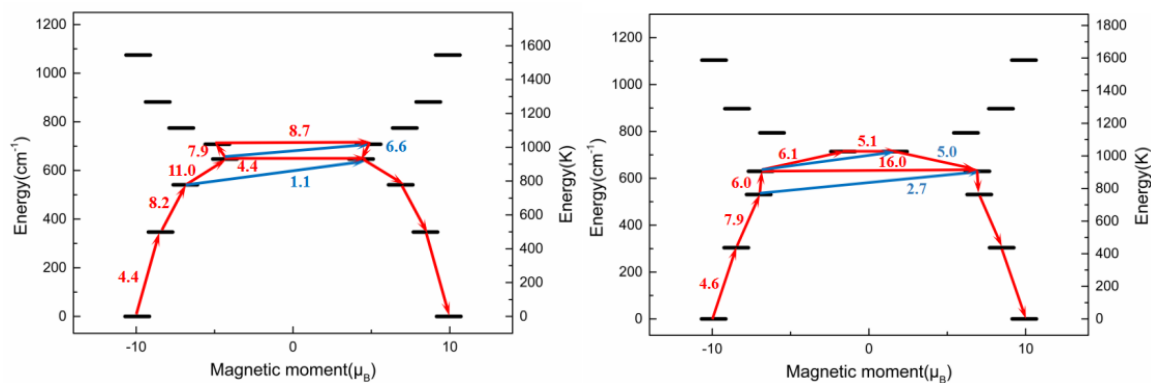

**Figure S72 The *Ab initio* calculations.** *Ab initio* calculated electronic states of the Dy(III) fragment from **1Dy**(left) and **3Dy**(right) with probability of transition between different sub-states. The numbers beside the arrows express the relative transition propensity. Related to STAR Methods.

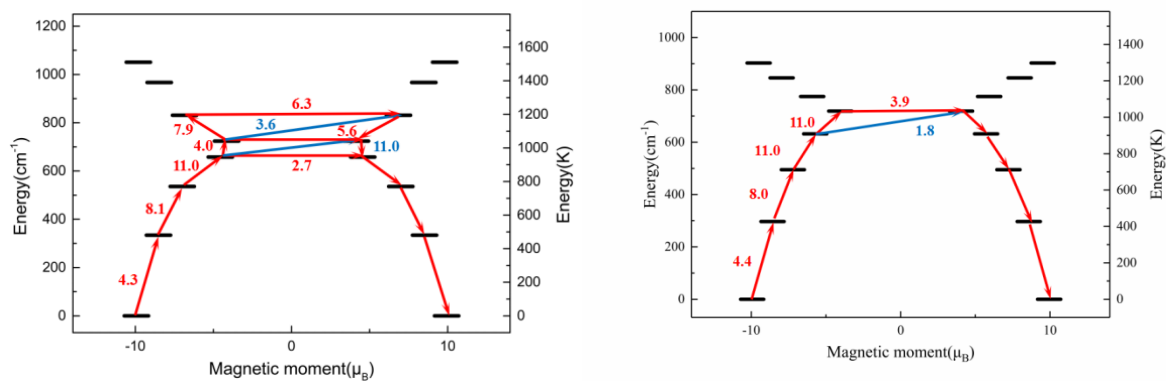

**Figure S73 The *Ab initio* calculations.** *Ab initio* calculated electronic states of the Dy(III) fragment from **2Dy**(left) and **4Dy**(right) with probability of transition between different sub-states. The numbers beside the arrows express the relative transition propensity. Related to STAR Methods.

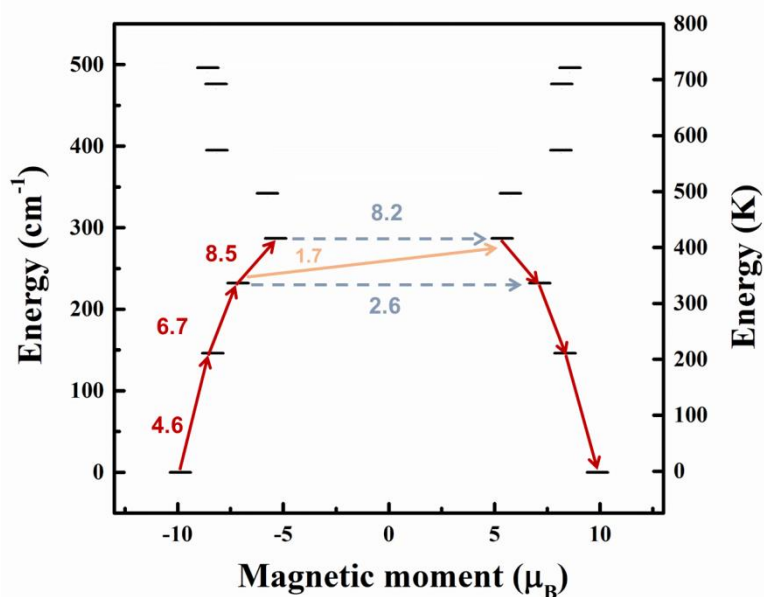

**Figure S74** The *Ab initio* calculations. *Ab initio* calculated electronic states of the  $J = 15/2$  manifold of the  ${}^6\text{H}_{15/2}$  term of  $\text{Dy}^{\text{III}}$  for complex **5Dy**. Arrows depict the relaxation pathway for direct vertical transitions to the first-neighbor multiplet (red), Orbach/Raman relaxation (orange) and QTM (gray), while the number of the corresponding color represents probability of transition. Related to STAR Methods.

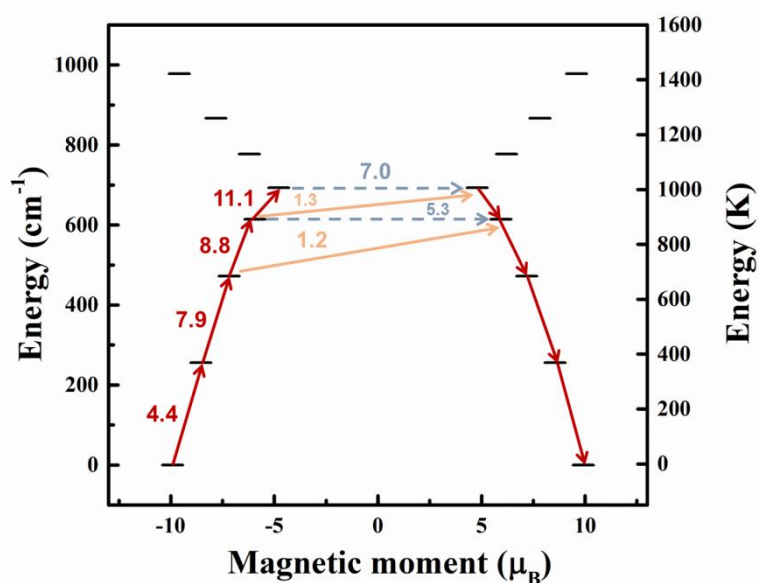

**Figure S75** The *Ab initio* calculations. *Ab initio* calculated electronic states of the  $J = 15/2$  manifold of the  ${}^6\text{H}_{15/2}$  term of  $\text{Dy}^{\text{III}}$  for complex **6Dy**. Arrows depict the relaxation pathway for direct vertical transitions to the first-neighbor multiplet (red), Orbach/Raman relaxation (orange) and QTM (gray), while the number of the corresponding color represents probability of transition. Related to STAR Methods.

**Table S16 *Ab initio* results for the  $J = 15/2$  multiplet of Dy<sup>III</sup> in 1Dy. Related to STAR Methods.**

| Ab initio<br>Energy<br>(cm <sup>-1</sup> ) | Ab initio<br>Energy<br>(K) | $g_x$ | $g_y$ | $g_z$ | $g_z$ Angle (°) | Crystal field<br>Wavefunction <sup>a</sup>      |
|--------------------------------------------|----------------------------|-------|-------|-------|-----------------|-------------------------------------------------|
| 0                                          | 0                          | 0.00  | 0.00  | 19.86 | -               | 98.7% ±15/2>                                    |
| 347                                        | 499                        | 0.03  | 0.04  | 16.90 | 5.99            | 95.1% ±13/2>                                    |
| 541                                        | 778                        | 0.81  | 1.22  | 13.73 | 19.91           | 78.9% ±11/2>+15.0% ±7/2>                        |
| 647                                        | 930                        | 3.36  | 4.42  | 8.68  | 18.83           | 43.5% ±9/2>+30.1% ±5/2>                         |
| 708                                        | 1018                       | 2.97  | 4.46  | 9.65  | 88.89           | 13.5% ±9/2>+22.5% ±3/2>+18.5% ∓3/2>             |
| 775                                        | 1114                       | 0.28  | 0.39  | 14.25 | 88.49           | 14.0% ±9/2>+19.5% ±1/2>+17.5% ∓1/2>+19.8% ∓7/2> |
| 882                                        | 1268                       | 0.06  | 0.09  | 17.26 | 89.33           | 17.3% ±7/2>+14.8% ±5/2>+10.7% ±3/2>+17.9% ∓5/2> |
| 1075                                       | 1545                       | 0.01  | 0.01  | 19.75 | 86.73           | 11.8% ±5/2>+21.9% ±1/2>+10.4% ∓1/2>+20.7% ∓3/2> |

<sup>a</sup> Only components with > 10% contribution are given, rounded to the nearest percent.

**Table S17 *Ab initio* results for the  $J = 15/2$  multiplet of Dy<sup>III</sup> in 2Dy. Related to STAR Methods.**

| Ab initio<br>Energy<br>(cm <sup>-1</sup> ) | Ab initio<br>Energy<br>(K) | $g_x$ | $g_y$ | $g_z$ | $g_z$ Angle (°) | Crystal field<br>Wavefunction <sup>a</sup>           |
|--------------------------------------------|----------------------------|-------|-------|-------|-----------------|------------------------------------------------------|
| 0                                          | 0                          | 0.00  | 0.00  | 19.87 | -               | 98.8% ±15/2>                                         |
| 334                                        | 480                        | 0.02  | 0.03  | 17.05 | 8.22            | 96.7% ±13/2>                                         |
| 536                                        | 771                        | 0.22  | 0.31  | 14.00 | 13.31           | 87.4% ±11/2>                                         |
| 658                                        | 946                        | 2.30  | 4.93  | 9.12  | 11.84           | 56.5% ±9/2>+25.2% ±5/2>                              |
| 724                                        | 1041                       | 3.05  | 5.55  | 8.31  | 89.36           | 10.5% ±9/2>+12.4% ±1/2>+26.9% ∓3/2>+23.1% ∓7/2>      |
| 831                                        | 1195                       | 0.10  | 0.14  | 13.70 | 89.67           | 13.5%<br> ±9/2>+20.7% ±5/2>+15.7% ±1/2>+28.2% ∓7/2>  |
| 967                                        | 1390                       | 0.05  | 0.06  | 16.95 | 86.81           | 20.8%  ±7/2>+29.4%  ±3/2>+36.7% ∓5/2>                |
| 1051                                       | 1511                       | 0.01  | 0.01  | 19.62 | 87.25           | 20.2% ±3/2>+ 19.8% ±1/2>+<br>12.4% ∓1/2>+30.5% ∓3/2> |

<sup>a</sup> Only components with > 10% contribution are given, rounded to the nearest percent.

**Table S18 *Ab initio* results for the  $J = 15/2$  multiplet of  $\text{Dy}^{\text{III}}$  in  $3\text{Dy}$ . Related to STAR Methods.**

| Ab initio<br>Energy<br>( $\text{cm}^{-1}$ ) | Ab initio<br>Energy<br>(K) | $g_x$ | $g_y$ | $g_z$ | $g_z$ Angle ( $^\circ$ ) | Crystal field<br>Wavefunction <sup>a</sup>                                                          |
|---------------------------------------------|----------------------------|-------|-------|-------|--------------------------|-----------------------------------------------------------------------------------------------------|
| 0                                           | 0                          | 0.00  | 0.00  | 19.82 | -                        | $97.3\% \pm 15/2\rangle$                                                                            |
| 304                                         | 437                        | 0.01  | 0.02  | 16.94 | 3.10                     | $94.3\% \pm 13/2\rangle$                                                                            |
| 531                                         | 763                        | 0.43  | 0.64  | 14.07 | 19.11                    | $83.2\% \pm 11/2\rangle$                                                                            |
| 630                                         | 906                        | 1.30  | 2.04  | 13.84 | 63.37                    | $20.6\% \pm 9/2\rangle$<br>$+18.7\% \pm 5/2\rangle + 14.0\% \pm 1/2\rangle + 13.3\% \mp 3/2\rangle$ |
| 714                                         | 1026                       | 7.87  | 5.82  | 3.32  | 43.43                    | $48.1\% \pm 9/2\rangle + 12.9\% \pm 3/2\rangle + 12.2\% \mp 1/2\rangle$                             |
| 794                                         | 1141                       | 2.67  | 4.07  | 12.37 | 87.03                    | $36.5\% \pm 7/2\rangle + 23.3\% \mp 1/2\rangle + 13.0\% \mp 5/2\rangle$                             |
| 897                                         | 1290                       | 0.45  | 0.78  | 16.83 | 85.56                    | $18.2\% \pm 7/2\rangle + 22.8\% \pm 3/2\rangle + 35.2\% \mp 5/2\rangle$                             |
| 1104                                        | 1587                       | 0.02  | 0.03  | 19.77 | 86.23                    | $18.7\% \pm 5/2\rangle + 34.6\% \pm 1/2\rangle + 26.7\% \mp 3/2\rangle$                             |

<sup>a</sup> Only components with > 10% contribution are given, rounded to the nearest percent.

**Table S19 *Ab initio* results for the  $J = 15/2$  multiplet of  $\text{Dy}^{\text{III}}$  in  $4\text{Dy}$ . Related to STAR Methods.**

| Ab initio<br>Energy<br>( $\text{cm}^{-1}$ ) | Ab initio<br>Energy<br>(K) | $g_x$ | $g_y$ | $g_z$ | $g_z$ Angle ( $^\circ$ ) | Crystal field<br>Wavefunction <sup>a</sup>                                                                              |
|---------------------------------------------|----------------------------|-------|-------|-------|--------------------------|-------------------------------------------------------------------------------------------------------------------------|
| 0                                           | 0                          | 0.00  | 0.00  | 19.88 | -                        | $96.7\% \pm 15/2\rangle$                                                                                                |
| 297                                         | 427                        | 0.02  | 0.02  | 17.15 | 9.19                     | $95.0\% \pm 13/2\rangle$                                                                                                |
| 495                                         | 712                        | 0.20  | 0.23  | 14.44 | 16.76                    | $93.8\% \pm 11/2\rangle$                                                                                                |
| 632                                         | 909                        | 1.55  | 1.84  | 11.44 | 25.15                    | $78.7\% \pm 9/2\rangle$                                                                                                 |
| 719                                         | 1034                       | 2.88  | 5.45  | 8.08  | 43.69                    | $11.4\% \pm 9/2\rangle + 46.2\% \pm 7/2\rangle$                                                                         |
| 775                                         | 1114                       | 2.61  | 4.50  | 11.85 | 83.45                    | $21.4\% \pm 7/2\rangle + 23.9\% \pm 5/2\rangle + 14.3\% \pm 3/2\rangle + 14.7\% \mp 1/2\rangle + 12.0\% \mp 5/2\rangle$ |
| 846                                         | 1216                       | 0.49  | 0.70  | 15.94 | 84.41                    | $28.7\% \pm 5/2\rangle + 11.3\% \pm 3/2\rangle + 12.3\% \mp 1/2\rangle + 22.7\% \mp 3/2\rangle$                         |
| 903                                         | 1298                       | 0.07  | 0.21  | 19.02 | 83.55                    | $28.2\% \pm 3/2\rangle + 30.1\% \pm 1/2\rangle + 23.5\% \mp 1/2\rangle$                                                 |

<sup>a</sup> Only components with > 10% contribution are given, rounded to the nearest percent.



**Table S20 *Ab initio* results for the  $J = 15/2$  multiplet of  $\text{Dy}^{\text{III}}$  in  $5\text{Dy}$ . Related to STAR Methods.**

| Energy<br>( $\text{cm}^{-1}$ ) | Energy<br>(K) | $g_x$ | $g_y$ | $g_z$ | $g_z$ Angle ( $^\circ$ ) | Wavefunction <sup>a</sup>                                                                            |
|--------------------------------|---------------|-------|-------|-------|--------------------------|------------------------------------------------------------------------------------------------------|
| 0                              | 0             | 0.01  | 0.02  | 19.75 | -                        | $83.5\% \mp 15/2\rangle + 15.3\% \pm 13/2\rangle$                                                    |
| 146                            | 210           | 0.33  | 0.52  | 16.68 | 2.8                      | $12.5\% \mp 15/2\rangle + 65.5\% \pm 13/2\rangle$                                                    |
| 232                            | 333           | 2.08  | 2.50  | 14.30 | 7.8                      | $66.58\% \mp 11/2\rangle$                                                                            |
| 287                            | 412           | 1.73  | 5.31  | 10.74 | 15                       | $54.3\% 9\mp/2\rangle + 10.3\% \mp 7/2\rangle$                                                       |
| 342                            | 492           | 2.34  | 5.01  | 11.50 | 12                       | $25.5\% \pm 7/2\rangle + 18.8\% \pm 5/2\rangle$                                                      |
| 395                            | 568           | 1.47  | 2.17  | 16.30 | 85                       | $15.7\% \pm 7/2\rangle + 18.8\% \mp 5/2\rangle + 27.3\% \pm 3/2\rangle$<br>$+ 10.7\% \mp 1/2\rangle$ |
| 476                            | 684           | 0.13  | 1.04  | 16.38 | 88                       | $11.1\% \mp 7/2\rangle + 21.5\% \mp 5/2\rangle + 10.4\% \mp 3/2\rangle$<br>$+ 22.9\% \mp 1/2\rangle$ |
| 496                            | 713           | 0.19  | 1.22  | 17.16 | 90                       | $21.9\% \mp 3/2\rangle + 23.9\% \mp 1/2\rangle$                                                      |

<sup>a</sup> Only components with  $> 10\%$  contribution are given, rounded to the nearest percent.

**Table S21 *Ab initio* results for the  $J = 15/2$  multiplet of  $\text{Dy}^{\text{III}}$  in  $6\text{Dy}$ . Related to STAR Methods.**

| Energy<br>( $\text{cm}^{-1}$ ) | Energy<br>(K) | $g_x$ | $g_y$ | $g_z$ | $g_z$ Angle<br>( $^\circ$ ) | Wavefunction <sup>a</sup>                                                                                                    |
|--------------------------------|---------------|-------|-------|-------|-----------------------------|------------------------------------------------------------------------------------------------------------------------------|
| 0                              | 0             | 0.00  | 0.00  | 19.82 | -                           | $94.3\% \mp 15/2\rangle$                                                                                                     |
| 256                            | 368           | 0.00  | 0.00  | 17.11 | 10.34                       | $92.5\% \pm 13/2\rangle$                                                                                                     |
| 472                            | 679           | 0.20  | 0.26  | 14.36 | 17.16                       | $90.9\% \mp 11/2\rangle$                                                                                                     |
| 614                            | 883           | 2.20  | 2.65  | 11.86 | 42.24                       | $54.7\% \mp 9/2\rangle + 17.3\% \mp 7/2\rangle$                                                                              |
| 693                            | 997           | 2.65  | 6.04  | 9.59  | 70.78                       | $24.2\% \mp 7/2\rangle + 18.0\% \pm 7/2\rangle + 18.3\% \mp 5/2\rangle$                                                      |
| 777                            | 1118          | 1.73  | 3.22  | 12.41 | 88.12                       | $14.8\% \mp 9/2\rangle + 18.3\% \mp 5/2\rangle + 12.5\% \pm 3/2\rangle +$<br>$17.4\% \mp 3/2\rangle + 17.9\% \pm 1/2\rangle$ |
| 867                            | 1247          | 0.83  | 1.44  | 15.64 | 83.04                       | $21.3\% \mp 5/2\rangle + 13.8\% \pm 3/2\rangle + 10.4\% \mp 1/2\rangle +$<br>$24.8\% \pm 1/2\rangle$                         |
| 978                            | 1407          | 0.11  | 0.27  | 19.19 | 79.43                       | $21.3\% \mp 5/2\rangle + 13.8\% \mp 3/2\rangle + 24.8\% \mp 1/2\rangle$<br>$+ 10.4\% \pm 1/2\rangle$                         |

<sup>a</sup> Only components with  $> 10\%$  contribution are given, rounded to the nearest percent

**Table S22 Average transition magnetic moment elements between the states of 1Dy, given in  $\mu_B^2$ . Related to STAR Methods.**

|                         | $ +\frac{15}{2}\rangle$ | $ -\frac{15}{2}\rangle$ | $ +\frac{13}{2}\rangle$ | $ -\frac{13}{2}\rangle$ | $ +a\rangle$ | $  -a\rangle$ | $ +b\rangle$ | $  -b\rangle$ | $ +c\rangle$ | $  -c\rangle$ | $ +d\rangle$ | $  -d\rangle$ | $ +e\rangle$ | $  -e\rangle$ | $ +f\rangle$ | $  -f\rangle$ |
|-------------------------|-------------------------|-------------------------|-------------------------|-------------------------|--------------|---------------|--------------|---------------|--------------|---------------|--------------|---------------|--------------|---------------|--------------|---------------|
| $ +\frac{15}{2}\rangle$ | --                      | 7.2E-08                 | 4.4E+00                 | 2.9E-03                 | 7.2E-02      | 6.9E-05       | 2.2E-02      | 4.7E-04       | 1.1E-02      | 1.2E-03       | 7.4E-03      | 8.6E-04       | 7.4E-04      | 5.4E-03       | 2.2E-04      | 1.6E-03       |
| $ -\frac{15}{2}\rangle$ | 7.2E-08                 | --                      | 2.9E-03                 | 4.4E+00                 | 6.9E-05      | 7.2E-02       | 4.7E-04      | 2.2E-02       | 1.2E-03      | 1.1E-02       | 8.6E-04      | 7.4E-03       | 5.4E-03      | 7.4E-04       | 1.6E-03      | 2.2E-04       |
| $ +\frac{13}{2}\rangle$ | 4.4E+00                 | 2.9E-03                 | --                      | 6.6E-02                 | 8.2E+00      | 2.3E-02       | 3.0E-01      | 1.2E-01       | 3.5E-02      | 8.9E-02       | 5.4E-03      | 8.2E-02       | 4.5E-02      | 1.5E-02       | 7.7E-03      | 7.4E-03       |
| $ -\frac{13}{2}\rangle$ | 2.9E-03                 | 4.4E+00                 | 6.6E-02                 | --                      | 2.3E-02      | 8.2E+00       | 1.2E-01      | 3.0E-01       | 8.9E-02      | 3.5E-02       | 8.2E-02      | 5.4E-03       | 1.5E-02      | 4.5E-02       | 7.4E-03      | 7.7E-03       |
| $ +a\rangle$            | 7.2E-02                 | 6.9E-05                 | 8.2E+00                 | 2.3E-02                 | --           | 2.7E-01       | 1.1E+01      | 1.1E+00       | 5.8E-01      | 3.6E-01       | 2.6E-01      | 1.3E-01       | 5.7E-02      | 1.4E-01       | 1.3E-02      | 3.0E-02       |
| $  -a\rangle$           | 6.9E-05                 | 7.2E-02                 | 2.3E-02                 | 8.2E+00                 | 2.7E-01      | --            | 1.1E+00      | 1.1E+01       | 3.6E-01      | 5.8E-01       | 1.3E-01      | 2.6E-01       | 1.4E-01      | 5.7E-02       | 3.0E-02      | 1.3E-02       |
| $ +b\rangle$            | 2.2E-02                 | 4.7E-04                 | 3.0E-01                 | 1.2E-01                 | 1.1E+01      | 1.1E+00       | --           | 4.4E+00       | 7.9E+00      | 6.6E+00       | 1.0E+00      | 3.4E-01       | 4.0E-01      | 2.0E-01       | 5.9E-03      | 4.2E-02       |
| $  -b\rangle$           | 4.7E-04                 | 2.2E-02                 | 1.2E-01                 | 3.0E-01                 | 1.1E+00      | 1.1E+01       | 4.4E+00      | --            | 6.6E+00      | 7.9E+00       | 3.4E-01      | 1.0E+00       | 2.0E-01      | 4.0E-01       | 4.2E-02      | 5.9E-03       |
| $ +c\rangle$            | 1.1E-02                 | 1.2E-03                 | 3.5E-02                 | 8.9E-02                 | 5.8E-01      | 3.6E-01       | 7.9E+00      | 6.6E+00       | --           | 8.7E+00       | 2.9E+00      | 8.4E+00       | 3.4E-01      | 1.0E-01       | 7.2E-02      | 2.7E-02       |
| $  -c\rangle$           | 1.2E-03                 | 1.1E-02                 | 8.9E-02                 | 3.5E-02                 | 3.6E-01      | 5.8E-01       | 6.6E+00      | 7.9E+00       | 8.7E+00      | --            | 8.4E+00      | 2.9E+00       | 1.0E-01      | 3.4E-01       | 2.7E-02      | 7.2E-02       |
| $ +d\rangle$            | 7.4E-03                 | 8.6E-04                 | 5.4E-03                 | 8.2E-02                 | 2.6E-01      | 1.3E-01       | 1.0E+00      | 3.4E-01       | 2.9E+00      | 8.4E+00       | --           | 1.7E+01       | 4.6E+00      | 2.6E+00       | 1.8E-01      | 8.6E-02       |
| $  -d\rangle$           | 8.6E-04                 | 7.4E-03                 | 8.2E-02                 | 5.4E-03                 | 1.3E-01      | 2.6E-01       | 3.4E-01      | 1.0E+00       | 8.4E+00      | 2.9E+00       | 1.7E+01      | --            | 2.6E+00      | 4.6E+00       | 8.6E-02      | 1.8E-01       |
| $ +e\rangle$            | 7.4E-04                 | 5.4E-03                 | 4.5E-02                 | 1.5E-02                 | 5.7E-02      | 1.4E-01       | 4.0E-01      | 2.0E-01       | 3.4E-01      | 1.0E-01       | 4.6E+00      | 2.6E+00       | --           | 1.9E+01       | 3.3E+00      | 9.6E-01       |
| $  -e\rangle$           | 5.4E-03                 | 7.4E-04                 | 1.5E-02                 | 4.5E-02                 | 1.4E-01      | 5.7E-02       | 2.0E-01      | 4.0E-01       | 1.0E-01      | 3.4E-01       | 2.6E+00      | 4.6E+00       | 1.9E+01      | --            | 9.6E-01      | 3.3E+00       |
| $ +f\rangle$            | 2.2E-04                 | 1.6E-03                 | 7.7E-03                 | 7.4E-03                 | 1.3E-02      | 3.0E-02       | 5.9E-03      | 4.2E-02       | 7.2E-02      | 2.7E-02       | 1.8E-01      | 8.6E-02       | 3.3E+00      | 9.6E-01       | --           | 1.6E+01       |
| $  -f\rangle$           | 1.6E-03                 | 2.2E-04                 | 7.4E-03                 | 7.7E-03                 | 3.0E-02      | 1.3E-02       | 4.2E-02      | 5.9E-03       | 2.7E-02      | 7.2E-02       | 8.6E-02      | 1.8E-01       | 9.6E-01      | 3.3E+00       | 1.6E+01      | --            |

**Table S23. Average transition magnetic moment elements between the states of 2Dy, given in  $\mu_B^2$ . Related to STAR Methods.**

|                         | $ +\frac{15}{2}\rangle$ | $ -\frac{15}{2}\rangle$ | $ +\frac{13}{2}\rangle$ | $ -\frac{13}{2}\rangle$ | $ +\frac{11}{2}\rangle$ | $ -\frac{11}{2}\rangle$ | $ +a\rangle$ | $  -a\rangle$ | $ +b\rangle$ | $  -b\rangle$ | $ +c\rangle$ | $  -c\rangle$ | $ +d\rangle$ | $  -d\rangle$ | $ +e\rangle$ | $  -e\rangle$ |
|-------------------------|-------------------------|-------------------------|-------------------------|-------------------------|-------------------------|-------------------------|--------------|---------------|--------------|---------------|--------------|---------------|--------------|---------------|--------------|---------------|
| $ +\frac{15}{2}\rangle$ |                         | 7.2E-08                 | 4.3E+00                 | 9.2E-06                 | 1.4E-01                 | 8.4E-05                 | 2.3E-02      | 1.1E-03       | 1.5E-03      | 1.0E-02       | 9.0E-04      | 4.9E-03       | 8.7E-04      | 5.1E-04       | 6.9E-05      | 1.2E-04       |
| $ -\frac{15}{2}\rangle$ | 7.2E-08                 |                         | 9.2E-06                 | 4.3E+00                 | 8.4E-05                 | 1.4E-01                 | 1.1E-03      | 2.3E-02       | 1.0E-02      | 1.5E-03       | 4.9E-03      | 9.0E-04       | 5.1E-04      | 8.7E-04       | 1.2E-04      | 6.9E-05       |
| $ +\frac{13}{2}\rangle$ | 4.3E+00                 | 9.2E-06                 |                         | 3.9E-04                 | 8.1E+00                 | 4.2E-03                 | 1.7E-01      | 8.5E-03       | 3.7E-02      | 1.4E-01       | 7.3E-03      | 5.1E-02       | 5.2E-03      | 5.0E-03       | 1.3E-03      | 1.1E-03       |
| $ -\frac{13}{2}\rangle$ | 9.2E-06                 | 4.3E+00                 | 3.9E-04                 |                         | 4.2E-03                 | 8.1E+00                 | 8.5E-03      | 1.7E-01       | 1.4E-01      | 3.7E-02       | 5.1E-02      | 7.3E-03       | 5.0E-03      | 5.2E-03       | 1.1E-03      | 1.3E-03       |
| $ +\frac{11}{2}\rangle$ | 1.4E-01                 | 8.4E-05                 | 8.1E+00                 | 4.2E-03                 |                         | 3.8E-02                 | 1.1E+01      | 2.2E-01       | 9.9E-01      | 3.2E-01       | 3.4E-01      | 1.3E-01       | 1.0E-02      | 3.6E-02       | 4.7E-03      | 6.1E-03       |
| $ -\frac{11}{2}\rangle$ | 8.4E-05                 | 1.4E-01                 | 4.2E-03                 | 8.1E+00                 | 3.8E-02                 |                         | 2.2E-01      | 1.1E+01       | 3.2E-01      | 9.9E-01       | 1.3E-01      | 3.4E-01       | 3.6E-02      | 1.0E-02       | 6.1E-03      | 4.7E-03       |
| $ +a\rangle$            | 2.3E-02                 | 1.1E-03                 | 1.7E-01                 | 8.5E-03                 | 1.1E+01                 | 2.2E-01                 |              | 2.7E+00       | 4.0E+00      | 1.1E+01       | 5.4E-01      | 9.3E-01       | 1.1E-01      | 3.1E-02       | 1.1E-02      | 5.8E-03       |
| $  -a\rangle$           | 1.1E-03                 | 2.3E-02                 | 8.5E-03                 | 1.7E-01                 | 2.2E-01                 | 1.1E+01                 | 2.7E+00      |               | 1.1E+01      | 4.0E+00       | 9.3E-01      | 5.4E-01       | 3.1E-02      | 1.1E-01       | 5.8E-03      | 1.1E-02       |
| $ +b\rangle$            | 1.5E-03                 | 1.0E-02                 | 3.7E-02                 | 1.4E-01                 | 9.9E-01                 | 3.2E-01                 | 4.0E+00      | 1.1E+01       |              | 5.6E+00       | 7.9E+00      | 3.6E+00       | 1.5E-01      | 3.9E-02       | 3.7E-02      | 2.7E-02       |
| $  -b\rangle$           | 1.0E-02                 | 1.5E-03                 | 1.4E-01                 | 3.7E-02                 | 3.2E-01                 | 9.9E-01                 | 1.1E+01      | 4.0E+00       | 5.6E+00      |               | 3.6E+00      | 7.9E+00       | 3.9E-02      | 1.5E-01       | 2.7E-02      | 3.7E-02       |
| $ +c\rangle$            | 9.0E-04                 | 4.9E-03                 | 7.3E-03                 | 5.1E-02                 | 3.4E-01                 | 1.3E-01                 | 5.4E-01      | 9.3E-01       | 7.9E+00      | 3.6E+00       |              | 6.3E+00       | 5.0E+00      | 3.4E+00       | 1.8E-01      | 1.1E-01       |
| $  -c\rangle$           | 4.9E-03                 | 9.0E-04                 | 5.1E-02                 | 7.3E-03                 | 1.3E-01                 | 3.4E-01                 | 9.3E-01      | 5.4E-01       | 3.6E+00      | 7.9E+00       | 6.3E+00      |               | 3.4E+00      | 5.0E+00       | 1.1E-01      | 1.8E-01       |
| $ +d\rangle$            | 8.7E-04                 | 5.1E-04                 | 5.2E-03                 | 5.0E-03                 | 1.0E-02                 | 3.6E-02                 | 1.1E-01      | 3.1E-02       | 1.5E-01      | 3.9E-02       | 5.0E+00      | 3.4E+00       |              | 2.4E+01       | 2.2E+00      | 2.6E+00       |
| $  -d\rangle$           | 5.1E-04                 | 8.7E-04                 | 5.0E-03                 | 5.2E-03                 | 3.6E-02                 | 1.0E-02                 | 3.1E-02      | 1.1E-01       | 3.9E-02      | 1.5E-01       | 3.4E+00      | 5.0E+00       | 2.4E+01      |               | 2.6E+00      | 2.2E+00       |
| $ +e\rangle$            | 6.9E-05                 | 1.2E-04                 | 1.3E-03                 | 1.1E-03                 | 4.7E-03                 | 6.1E-03                 | 1.1E-02      | 5.8E-03       | 3.7E-02      | 2.7E-02       | 1.8E-01      | 1.1E-01       | 2.2E+00      | 2.6E+00       |              | 3.2E+01       |
| $  -e\rangle$           | 1.2E-04                 | 6.9E-05                 | 1.1E-03                 | 1.3E-03                 | 6.1E-03                 | 4.7E-03                 | 5.8E-03      | 1.1E-02       | 2.7E-02      | 3.7E-02       | 1.1E-01      | 1.8E-01       | 2.6E+00      | 2.2E+00       | 3.2E+01      |               |

**Table S24 Average transition magnetic moment elements between the states of 3Dy, given in  $\mu_B^2$ . Related to STAR Methods.**

|                         | $ +\frac{15}{2}\rangle$ | $ -\frac{15}{2}\rangle$ | $ +\frac{13}{2}\rangle$ | $ -\frac{13}{2}\rangle$ | $ +\frac{11}{2}\rangle$ | $ -\frac{11}{2}\rangle$ | +a>     | -a>     | +b>     | -b>     | +c>     | -c>     | +d>     | -d>     | +e>     | -e>     |
|-------------------------|-------------------------|-------------------------|-------------------------|-------------------------|-------------------------|-------------------------|---------|---------|---------|---------|---------|---------|---------|---------|---------|---------|
| $ +\frac{15}{2}\rangle$ | --                      | 7.8E-08                 | 4.6E+00                 | 5.5E-05                 | 4.6E-02                 | 1.6E-04                 | 1.7E-03 | 1.4E-03 | 4.1E-03 | 5.6E-04 | 2.3E-03 | 7.6E-04 | 1.2E-03 | 8.9E-04 | 2.1E-04 | 2.4E-04 |
| $ -\frac{15}{2}\rangle$ | 7.8E-08                 | --                      | 5.5E-05                 | 4.6E+00                 | 1.6E-04                 | 4.6E-02                 | 1.4E-03 | 1.7E-03 | 5.6E-04 | 4.1E-03 | 7.6E-04 | 2.3E-03 | 8.9E-04 | 1.2E-03 | 2.4E-04 | 2.1E-04 |
| $ +\frac{13}{2}\rangle$ | 4.6E+00                 | 5.5E-05                 | --                      | 1.3E-03                 | 7.9E+00                 | 2.1E-02                 | 3.1E-01 | 2.5E-01 | 6.4E-02 | 1.5E-02 | 1.1E-02 | 1.7E-02 | 7.1E-03 | 1.7E-02 | 4.1E-03 | 1.8E-03 |
| $ -\frac{13}{2}\rangle$ | 5.5E-05                 | 4.6E+00                 | 1.3E-03                 | --                      | 2.1E-02                 | 7.9E+00                 | 2.5E-01 | 3.1E-01 | 1.5E-02 | 6.4E-02 | 1.7E-02 | 1.1E-02 | 1.7E-02 | 7.1E-03 | 1.8E-03 | 4.1E-03 |
| $ +\frac{11}{2}\rangle$ | 4.6E-02                 | 1.6E-04                 | 7.9E+00                 | 2.1E-02                 | --                      | 1.8E-01                 | 6.0E+00 | 2.7E+00 | 3.3E+00 | 5.0E-02 | 3.4E-01 | 1.1E-01 | 1.1E-01 | 6.5E-02 | 1.1E-02 | 2.0E-02 |
| $ -\frac{11}{2}\rangle$ | 1.6E-04                 | 4.6E-02                 | 2.1E-02                 | 7.9E+00                 | 1.8E-01                 | --                      | 2.7E+00 | 6.0E+00 | 5.0E-02 | 3.3E+00 | 1.1E-01 | 3.4E-01 | 6.5E-02 | 1.1E-01 | 2.0E-02 | 1.1E-02 |
| +a>                     | 1.7E-03                 | 1.4E-03                 | 3.1E-01                 | 2.5E-01                 | 6.0E+00                 | 2.7E+00                 | --      | 1.6E+01 | 6.1E+00 | 5.0E+00 | 5.1E-01 | 2.7E-01 | 9.9E-02 | 1.4E-01 | 1.5E-02 | 2.2E-02 |
| -a>                     | 1.4E-03                 | 1.7E-03                 | 2.5E-01                 | 3.1E-01                 | 2.7E+00                 | 6.0E+00                 | 1.6E+01 | --      | 5.0E+00 | 6.1E+00 | 2.7E-01 | 5.1E-01 | 1.4E-01 | 9.9E-02 | 2.2E-02 | 1.5E-02 |
| +b>                     | 4.1E-03                 | 5.6E-04                 | 6.4E-02                 | 1.5E-02                 | 3.3E+00                 | 5.0E-02                 | 6.1E+00 | 5.0E+00 | --      | 5.1E+00 | 1.0E+01 | 3.0E+00 | 6.2E-01 | 3.3E-01 | 9.2E-02 | 2.8E-02 |
| -b>                     | 5.6E-04                 | 4.1E-03                 | 1.5E-02                 | 6.4E-02                 | 5.0E-02                 | 3.3E+00                 | 5.0E+00 | 6.1E+00 | 5.1E+00 | --      | 3.0E+00 | 1.0E+01 | 3.3E-01 | 6.2E-01 | 2.8E-02 | 9.2E-02 |
| +c>                     | 2.3E-03                 | 7.6E-04                 | 1.1E-02                 | 1.7E-02                 | 3.4E-01                 | 1.1E-01                 | 5.1E-01 | 2.7E-01 | 1.0E+01 | 3.0E+00 | --      | 1.4E+01 | 2.3E+00 | 5.9E+00 | 1.0E-01 | 1.1E-01 |
| -c>                     | 7.6E-04                 | 2.3E-03                 | 1.7E-02                 | 1.1E-02                 | 1.1E-01                 | 3.4E-01                 | 2.7E-01 | 5.1E-01 | 3.0E+00 | 1.0E+01 | 1.4E+01 | --      | 5.9E+00 | 2.3E+00 | 1.1E-01 | 1.0E-01 |
| +d>                     | 1.2E-03                 | 8.9E-04                 | 7.1E-03                 | 1.7E-02                 | 1.1E-01                 | 6.5E-02                 | 9.9E-02 | 1.4E-01 | 6.2E-01 | 3.3E-01 | 2.3E+00 | 5.9E+00 | --      | 2.2E+01 | 1.6E+00 | 2.6E+00 |
| -d>                     | 8.9E-04                 | 1.2E-03                 | 1.7E-02                 | 7.1E-03                 | 6.5E-02                 | 1.1E-01                 | 1.4E-01 | 9.9E-02 | 3.3E-01 | 6.2E-01 | 5.9E+00 | 2.3E+00 | 2.2E+01 | --      | 2.6E+00 | 1.6E+00 |
| +e>                     | 2.1E-04                 | 2.4E-04                 | 4.1E-03                 | 1.8E-03                 | 1.1E-02                 | 2.0E-02                 | 1.5E-02 | 2.2E-02 | 9.2E-02 | 2.8E-02 | 1.0E-01 | 1.1E-01 | 1.6E+00 | 2.6E+00 | --      | 2.3E+01 |
| -e>                     | 2.4E-04                 | 2.1E-04                 | 1.8E-03                 | 4.1E-03                 | 2.0E-02                 | 1.1E-02                 | 2.2E-02 | 1.5E-02 | 2.8E-02 | 9.2E-02 | 1.1E-01 | 1.0E-01 | 2.6E+00 | 1.6E+00 | 2.3E+01 | --      |

**Table S25 Average transition magnetic moment elements between the states of 4Dy, given in  $\mu_B^2$ . Related to STAR Methods.**

|                         | $ +\frac{15}{2}\rangle$ | $ -\frac{15}{2}\rangle$ | $ +\frac{13}{2}\rangle$ | $ -\frac{13}{2}\rangle$ | $ +\frac{11}{2}\rangle$ | $ -\frac{11}{2}\rangle$ | $ +\frac{9}{2}\rangle$ | $ -\frac{9}{2}\rangle$ | $ +a\rangle$ | $  -a\rangle$ | $ +b\rangle$ | $  -b\rangle$ | $ +c\rangle$ | $  -c\rangle$ | $ +d\rangle$ | $  -d\rangle$ |
|-------------------------|-------------------------|-------------------------|-------------------------|-------------------------|-------------------------|-------------------------|------------------------|------------------------|--------------|---------------|--------------|---------------|--------------|---------------|--------------|---------------|
| $ +\frac{15}{2}\rangle$ |                         | 1.1E-07                 | 4.3E+00                 | 1.7E-05                 | 1.6E-01                 | 8.2E-06                 | 7.3E-03                | 1.1E-04                | 2.3E-03      | 5.2E-04       | 3.9E-04      | 5.5E-04       | 4.2E-04      | 1.5E-04       | 2.2E-04      | 2.3E-05       |
| $ -\frac{15}{2}\rangle$ | 1.1E-07                 |                         | 1.7E-05                 | 4.3E+00                 | 8.2E-06                 | 1.6E-01                 | 1.1E-04                | 7.3E-03                | 5.2E-04      | 2.3E-03       | 5.5E-04      | 3.9E-04       | 1.5E-04      | 4.2E-04       | 2.3E-05      | 2.2E-04       |
| $ +\frac{13}{2}\rangle$ | 4.3E+00                 | 1.7E-05                 |                         | 3.9E-04                 | 8.0E+00                 | 1.2E-03                 | 2.7E-01                | 1.6E-03                | 2.0E-02      | 5.5E-03       | 3.3E-03      | 6.6E-03       | 2.4E-03      | 1.1E-03       | 2.0E-03      | 4.3E-04       |
| $ -\frac{13}{2}\rangle$ | 1.7E-05                 | 4.3E+00                 | 3.9E-04                 |                         | 1.2E-03                 | 8.0E+00                 | 1.6E-03                | 2.7E-01                | 5.5E-03      | 2.0E-02       | 6.6E-03      | 3.3E-03       | 1.1E-03      | 2.4E-03       | 4.3E-04      | 2.0E-03       |
| $ +\frac{11}{2}\rangle$ | 1.6E-01                 | 8.2E-06                 | 8.0E+00                 | 1.2E-03                 |                         | 1.4E-02                 | 1.1E+01                | 2.2E-01                | 4.1E-01      | 1.5E-01       | 3.7E-02      | 7.2E-02       | 2.0E-02      | 1.2E-02       | 9.8E-03      | 2.7E-03       |
| $ -\frac{11}{2}\rangle$ | 8.2E-06                 | 1.6E-01                 | 1.2E-03                 | 8.0E+00                 | 1.4E-02                 |                         | 2.2E-01                | 1.1E+01                | 1.5E-01      | 4.1E-01       | 7.2E-02      | 3.7E-02       | 1.2E-02      | 2.0E-02       | 2.7E-03      | 9.8E-03       |
| $ +\frac{9}{2}\rangle$  | 7.3E-03                 | 1.1E-04                 | 2.7E-01                 | 1.6E-03                 | 1.1E+01                 | 2.2E-01                 |                        | 9.0E-01                | 1.1E+01      | 1.8E+00       | 6.0E-01      | 6.3E-01       | 1.9E-01      | 1.1E-01       | 4.0E-02      | 2.8E-02       |
| $ -\frac{9}{2}\rangle$  | 1.1E-04                 | 7.3E-03                 | 1.6E-03                 | 2.7E-01                 | 2.2E-01                 | 1.1E+01                 | 9.0E-01                |                        | 1.8E+00      | 1.1E+01       | 6.3E-01      | 6.0E-01       | 1.1E-01      | 1.9E-01       | 2.8E-02      | 4.0E-02       |
| $ +a\rangle$            | 2.3E-03                 | 5.2E-04                 | 2.0E-02                 | 5.5E-03                 | 4.1E-01                 | 1.5E-01                 | 1.1E+01                | 1.8E+00                |              | 3.9E+00       | 2.0E+00      | 1.1E+01       | 4.3E-01      | 1.3E+00       | 1.1E-01      | 7.9E-02       |
| $  -a\rangle$           | 5.2E-04                 | 2.3E-03                 | 5.5E-03                 | 2.0E-02                 | 1.5E-01                 | 4.1E-01                 | 1.8E+00                | 1.1E+01                | 3.9E+00      |               | 1.1E+01      | 2.0E+00       | 1.3E+00      | 4.3E-01       | 7.9E-02      | 1.1E-01       |
| $ +b\rangle$            | 3.9E-04                 | 5.5E-04                 | 3.3E-03                 | 6.6E-03                 | 3.7E-02                 | 7.2E-02                 | 6.0E-01                | 6.3E-01                | 2.0E+00      | 1.1E+01       |              | 9.0E+00       | 3.1E+00      | 5.1E+00       | 4.5E-01      | 3.4E-01       |
| $  -b\rangle$           | 5.5E-04                 | 3.9E-04                 | 6.6E-03                 | 3.3E-03                 | 7.2E-02                 | 3.7E-02                 | 6.3E-01                | 6.0E-01                | 1.1E+01      | 2.0E+00       | 9.0E+00      |               | 5.1E+00      | 3.1E+00       | 3.4E-01      | 4.5E-01       |
| $ +c\rangle$            | 4.2E-04                 | 1.5E-04                 | 2.4E-03                 | 1.1E-03                 | 2.0E-02                 | 1.2E-02                 | 1.9E-01                | 1.1E-01                | 4.3E-01      | 1.3E+00       | 3.1E+00      | 5.1E+00       |              | 1.8E+01       | 3.9E+00      | 2.2E+00       |
| $  -c\rangle$           | 1.5E-04                 | 4.2E-04                 | 1.1E-03                 | 2.4E-03                 | 1.2E-02                 | 2.0E-02                 | 1.1E-01                | 1.9E-01                | 1.3E+00      | 4.3E-01       | 5.1E+00      | 3.1E+00       | 1.8E+01      |               | 2.2E+00      | 3.9E+00       |
| $ +d\rangle$            | 2.2E-04                 | 2.3E-05                 | 2.0E-03                 | 4.3E-04                 | 9.8E-03                 | 2.7E-03                 | 4.0E-02                | 2.8E-02                | 1.1E-01      | 7.9E-02       | 4.5E-01      | 3.4E-01       | 3.9E+00      | 2.2E+00       |              | 1.9E+00       |
| $  -d\rangle$           | 2.3E-05                 | 2.2E-04                 | 4.3E-04                 | 2.0E-03                 | 2.7E-03                 | 9.8E-03                 | 2.8E-02                | 4.0E-02                | 7.9E-02      | 1.1E-01       | 3.4E-01      | 4.5E-01       | 2.2E+00      | 3.9E+00       | 1.9E+00      |               |

**Table S26 Average transition magnetic moment elements between the states of 5Dy, given in  $\mu_B^2$ . Related to STAR Methods.**

|                         | $ +\frac{15}{2}\rangle$ | $ -\frac{15}{2}\rangle$ | $ +\frac{13}{2}\rangle$ | $ -\frac{13}{2}\rangle$ | $ +\frac{11}{2}\rangle$ | $ -\frac{11}{2}\rangle$ | +a>     | -a>     | +b>     | -b>     | +c>     | -c>     | +d>     | -d>     | +e>     | -e>     |
|-------------------------|-------------------------|-------------------------|-------------------------|-------------------------|-------------------------|-------------------------|---------|---------|---------|---------|---------|---------|---------|---------|---------|---------|
| $ +\frac{15}{2}\rangle$ | --                      | 9.4E-05                 | 3.0E-03                 | 4.6E+00                 | 1.3E-01                 | 1.9E-02                 | 3.3E-02 | 1.2E-02 | 9.4E-03 | 1.6E-02 | 3.8E-03 | 5.5E-03 | 7.9E-05 | 1.4E-02 | 4.3E-03 | 7.7E-04 |
| $ -\frac{15}{2}\rangle$ | 9.4E-05                 | --                      | 4.6E+00                 | 3.0E-03                 | 1.9E-02                 | 1.3E-01                 | 1.2E-02 | 3.3E-02 | 1.6E-02 | 9.4E-03 | 5.5E-03 | 3.8E-03 | 1.4E-02 | 7.9E-05 | 7.7E-04 | 4.3E-03 |
| $ +\frac{13}{2}\rangle$ | 3.0E-03                 | 4.6E+00                 | --                      | 8.6E-02                 | 6.2E-01                 | 6.7E+00                 | 3.6E-01 | 1.2E+00 | 1.4E-01 | 2.3E-01 | 3.2E-02 | 3.7E-02 | 7.8E-02 | 3.9E-03 | 1.2E-02 | 4.5E-02 |
| $ -\frac{13}{2}\rangle$ | 4.6E+00                 | 3.0E-03                 | 8.6E-02                 | --                      | 6.7E+00                 | 6.2E-01                 | 1.2E+00 | 3.6E-01 | 2.3E-01 | 1.4E-01 | 3.7E-02 | 3.2E-02 | 3.9E-03 | 7.8E-02 | 4.5E-02 | 1.2E-02 |
| $ +\frac{11}{2}\rangle$ | 1.3E-01                 | 1.9E-02                 | 6.2E-01                 | 6.7E+00                 | --                      | 2.6E+00                 | 8.5E+00 | 1.8E+00 | 6.0E-01 | 6.1E-01 | 4.6E-02 | 2.1E-01 | 2.9E-02 | 1.7E-01 | 6.9E-02 | 4.1E-02 |
| $ -\frac{11}{2}\rangle$ | 1.9E-02                 | 1.3E-01                 | 6.7E+00                 | 6.2E-01                 | 2.6E+00                 | --                      | 1.8E+00 | 8.5E+00 | 6.1E-01 | 6.0E-01 | 2.1E-01 | 4.6E-02 | 1.7E-01 | 2.9E-02 | 4.1E-02 | 6.9E-02 |
| +a>                     | 3.3E-02                 | 1.2E-02                 | 3.6E-01                 | 1.2E+00                 | 8.5E+00                 | 1.8E+00                 | --      | 8.2E+00 | 5.3E+00 | 5.7E+00 | 6.2E-01 | 7.1E-01 | 1.3E-01 | 5.4E-01 | 9.2E-02 | 3.5E-01 |
| -a>                     | 1.2E-02                 | 3.3E-02                 | 1.2E+00                 | 3.6E-01                 | 1.8E+00                 | 8.5E+00                 | 8.2E+00 | --      | 5.7E+00 | 5.3E+00 | 7.1E-01 | 6.2E-01 | 5.4E-01 | 1.3E-01 | 3.5E-01 | 9.2E-02 |
| +b>                     | 9.4E-03                 | 1.6E-02                 | 1.4E-01                 | 2.3E-01                 | 6.0E-01                 | 6.1E-01                 | 5.3E+00 | 5.7E+00 | --      | 5.1E+00 | 3.0E+00 | 5.1E+00 | 1.7E+00 | 4.6E-01 | 6.8E-01 | 5.8E-01 |
| -b>                     | 1.6E-02                 | 9.4E-03                 | 2.3E-01                 | 1.4E-01                 | 6.1E-01                 | 6.0E-01                 | 5.7E+00 | 5.3E+00 | 5.1E+00 | --      | 5.1E+00 | 3.0E+00 | 4.6E-01 | 1.7E+00 | 5.8E-01 | 6.8E-01 |
| +c>                     | 3.8E-03                 | 5.5E-03                 | 3.2E-02                 | 3.7E-02                 | 4.6E-02                 | 2.1E-01                 | 6.2E-01 | 7.1E-01 | 3.0E+00 | 5.1E+00 | --      | 2.1E+01 | 1.0E+00 | 2.1E+00 | 1.2E+00 | 9.4E-01 |
| -c>                     | 5.5E-03                 | 3.8E-03                 | 3.7E-02                 | 3.2E-02                 | 2.1E-01                 | 4.6E-02                 | 7.1E-01 | 6.2E-01 | 5.1E+00 | 3.0E+00 | 2.1E+01 | --      | 2.1E+00 | 1.0E+00 | 9.4E-01 | 1.2E+00 |
| +d>                     | 7.9E-05                 | 1.4E-02                 | 7.8E-02                 | 3.9E-03                 | 2.9E-02                 | 1.7E-01                 | 1.3E-01 | 5.4E-01 | 1.7E+00 | 4.6E-01 | 1.0E+00 | 2.1E+00 | --      | 1.3E+00 | 1.1E+00 | 7.3E+00 |
| -d>                     | 1.4E-02                 | 7.9E-05                 | 3.9E-03                 | 7.8E-02                 | 1.7E-01                 | 2.9E-02                 | 5.4E-01 | 1.3E-01 | 4.6E-01 | 1.7E+00 | 2.1E+00 | 1.0E+00 | 1.3E+00 | --      | 7.3E+00 | 1.1E+00 |
| +e>                     | 4.3E-03                 | 7.7E-04                 | 1.2E-02                 | 4.5E-02                 | 6.9E-02                 | 4.1E-02                 | 9.2E-02 | 3.5E-01 | 6.8E-01 | 5.8E-01 | 1.2E+00 | 9.4E-01 | 1.1E+00 | 7.3E+00 | --      | 1.6E+01 |
| -e>                     | 7.7E-04                 | 4.3E-03                 | 4.5E-02                 | 1.2E-02                 | 4.1E-02                 | 6.9E-02                 | 3.5E-01 | 9.2E-02 | 5.8E-01 | 6.8E-01 | 9.4E-01 | 1.2E+00 | 7.3E+00 | 1.1E+00 | 1.6E+01 | --      |

**Table S27 Average transition magnetic moment elements between the states of 6Dy, given in  $\mu_B^2$ . Related to STAR Methods.**

|                         | $ +\frac{15}{2}\rangle$ | $ -\frac{15}{2}\rangle$ | $ +\frac{13}{2}\rangle$ | $ -\frac{13}{2}\rangle$ | $ +\frac{11}{2}\rangle$ | $ -\frac{11}{2}\rangle$ | +a>     | -a>     | +b>     | -b>     | +c>     | -c>     | +d>     | -d>     | +e>     | -e>     |
|-------------------------|-------------------------|-------------------------|-------------------------|-------------------------|-------------------------|-------------------------|---------|---------|---------|---------|---------|---------|---------|---------|---------|---------|
| $ +\frac{15}{2}\rangle$ | --                      | 5.8E-09                 | 8.9E-07                 | 4.5E+00                 | 1.6E-01                 | 8.1E-05                 | 2.1E-02 | 4.0E-03 | 2.9E-03 | 1.1E-03 | 2.6E-03 | 2.8E-04 | 1.0E-03 | 4.0E-04 | 5.6E-05 | 2.3E-04 |
| $ -\frac{15}{2}\rangle$ | 5.8E-09                 | --                      | 4.5E+00                 | 8.9E-07                 | 8.1E-05                 | 1.6E-01                 | 4.0E-03 | 2.1E-02 | 1.1E-03 | 2.9E-03 | 2.8E-04 | 2.6E-03 | 4.0E-04 | 1.0E-03 | 2.3E-04 | 5.6E-05 |
| $ +\frac{13}{2}\rangle$ | 8.9E-07                 | 4.5E+00                 | --                      | 3.6E-05                 | 3.1E-03                 | 8.0E+00                 | 4.3E-02 | 2.0E-01 | 4.9E-02 | 2.3E-02 | 7.8E-03 | 1.7E-02 | 1.6E-03 | 8.7E-03 | 1.8E-03 | 5.3E-04 |
| $ -\frac{13}{2}\rangle$ | 4.5E+00                 | 8.9E-07                 | 3.6E-05                 | --                      | 8.0E+00                 | 3.1E-03                 | 2.0E-01 | 4.3E-02 | 2.3E-02 | 4.9E-02 | 1.7E-02 | 7.8E-03 | 8.7E-03 | 1.6E-03 | 5.3E-04 | 1.8E-03 |
| $ +\frac{11}{2}\rangle$ | 1.6E-01                 | 8.1E-05                 | 3.1E-03                 | 8.0E+00                 | --                      | 2.6E-02                 | 8.9E+00 | 1.2E+00 | 3.5E-01 | 9.8E-01 | 2.1E-01 | 9.5E-02 | 7.3E-02 | 1.4E-02 | 3.8E-03 | 1.4E-02 |
| $ -\frac{11}{2}\rangle$ | 8.1E-05                 | 1.6E-01                 | 8.0E+00                 | 3.1E-03                 | 2.6E-02                 | --                      | 1.2E+00 | 8.9E+00 | 9.8E-01 | 3.5E-01 | 9.5E-02 | 2.1E-01 | 1.4E-02 | 7.3E-02 | 1.4E-02 | 3.8E-03 |
| +a>                     | 2.1E-02                 | 4.0E-03                 | 4.3E-02                 | 2.0E-01                 | 8.9E+00                 | 1.2E+00                 | --      | 5.3E+00 | 1.3E+00 | 1.1E+01 | 9.3E-01 | 7.1E-01 | 1.4E-01 | 1.1E-01 | 1.7E-02 | 3.6E-02 |
| -a>                     | 4.0E-03                 | 2.1E-02                 | 2.0E-01                 | 4.3E-02                 | 1.2E+00                 | 8.9E+00                 | 5.3E+00 | --      | 1.1E+01 | 1.3E+00 | 7.1E-01 | 9.3E-01 | 1.1E-01 | 1.4E-01 | 3.6E-02 | 1.7E-02 |
| +b>                     | 2.9E-03                 | 1.1E-03                 | 4.9E-02                 | 2.3E-02                 | 3.5E-01                 | 9.8E-01                 | 1.3E+00 | 1.1E+01 | --      | 7.0E+00 | 5.9E+00 | 5.5E+00 | 5.7E-01 | 5.8E-01 | 3.7E-02 | 1.3E-02 |
| -b>                     | 1.1E-03                 | 2.9E-03                 | 2.3E-02                 | 4.9E-02                 | 9.8E-01                 | 3.5E-01                 | 1.1E+01 | 1.3E+00 | 7.0E+00 | --      | 5.5E+00 | 5.9E+00 | 5.8E-01 | 5.7E-01 | 1.3E-02 | 3.7E-02 |
| +c>                     | 2.6E-03                 | 2.8E-04                 | 7.8E-03                 | 1.7E-02                 | 2.1E-01                 | 9.5E-02                 | 9.3E-01 | 7.1E-01 | 5.9E+00 | 5.5E+00 | --      | 3.5E+00 | 8.2E+00 | 1.4E+00 | 3.5E-02 | 6.4E-01 |
| -c>                     | 2.8E-04                 | 2.6E-03                 | 1.7E-02                 | 7.8E-03                 | 9.5E-02                 | 2.1E-01                 | 7.1E-01 | 9.3E-01 | 5.5E+00 | 5.9E+00 | 3.5E+00 | --      | 1.4E+00 | 8.2E+00 | 6.4E-01 | 3.5E-02 |
| +d>                     | 1.0E-03                 | 4.0E-04                 | 1.6E-03                 | 8.7E-03                 | 7.3E-02                 | 1.4E-02                 | 1.4E-01 | 1.1E-01 | 5.7E-01 | 5.8E-01 | 8.2E+00 | 1.4E+00 | --      | 1.2E+01 | 9.8E-01 | 4.7E+00 |
| -d>                     | 4.0E-04                 | 1.0E-03                 | 8.7E-03                 | 1.6E-03                 | 1.4E-02                 | 7.3E-02                 | 1.1E-01 | 1.4E-01 | 5.8E-01 | 5.7E-01 | 1.4E+00 | 8.2E+00 | 1.2E+01 | --      | 4.7E+00 | 9.8E-01 |
| +e>                     | 5.6E-05                 | 2.3E-04                 | 1.8E-03                 | 5.3E-04                 | 3.8E-03                 | 1.4E-02                 | 1.7E-02 | 3.6E-02 | 3.7E-02 | 1.3E-02 | 3.5E-02 | 6.4E-01 | 9.8E-01 | 4.7E+00 | --      | 1.9E+00 |
| -e>                     | 2.3E-04                 | 5.6E-05                 | 5.3E-04                 | 1.8E-03                 | 1.4E-02                 | 3.8E-03                 | 3.6E-02 | 1.7E-02 | 1.3E-02 | 3.7E-02 | 6.4E-01 | 3.5E-02 | 4.7E+00 | 9.8E-01 | 1.9E+00 | --      |

**Table S28** The calculated energies of spin-orbit states ( $\text{cm}^{-1}$ ). The tunneling splittings ( $\text{cm}^{-1}$ ) and  $g_z$  values of the low-lying exchange doublet states of **2Dy**. Related to STAR Methods.

| E     | $\Delta_{\text{tun}}$ | $g_z$  |
|-------|-----------------------|--------|
| 0.000 | 4.0E-9                | 0.000  |
| 1.676 | 2.8E-9                | 39.748 |

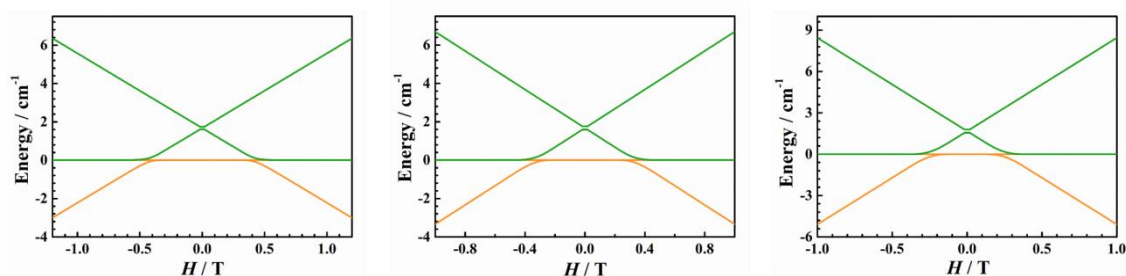

**Figure S76** The simulated Zeeman diagram of **2Dy**. The directions of applied magnetic field is the molecule's x-axis (left), y-axis (center) and z-axis (right). Related to Figure 6 and STAR Methods.

**Table S29** The calculated energies of spin-orbit states ( $\text{cm}^{-1}$ ). The tunneling splittings ( $\text{cm}^{-1}$ ) and  $g_z$  values of the low-lying exchange doublet states of **4Dy**. Related to STAR Methods.

| E     | $\Delta_{\text{tun}}$ | $g_z$  |
|-------|-----------------------|--------|
| 0.000 | 5.5E-9                | 0.000  |
| 1.036 | 1.2E-9                | 39.757 |

**Table S30** The calculated energies of spin-orbit states ( $\text{cm}^{-1}$ ). The tunneling splittings ( $\text{cm}^{-1}$ ) and  $g_z$  values of the low-lying exchange doublet states of **6Dy**. Related to STAR Methods.

| E     | $\Delta_{\text{tun}}$ | $g_z$  |
|-------|-----------------------|--------|
| 0.000 | 3.0E-10               | 0.000  |
| 1.006 | 1.0E-10               | 39.650 |



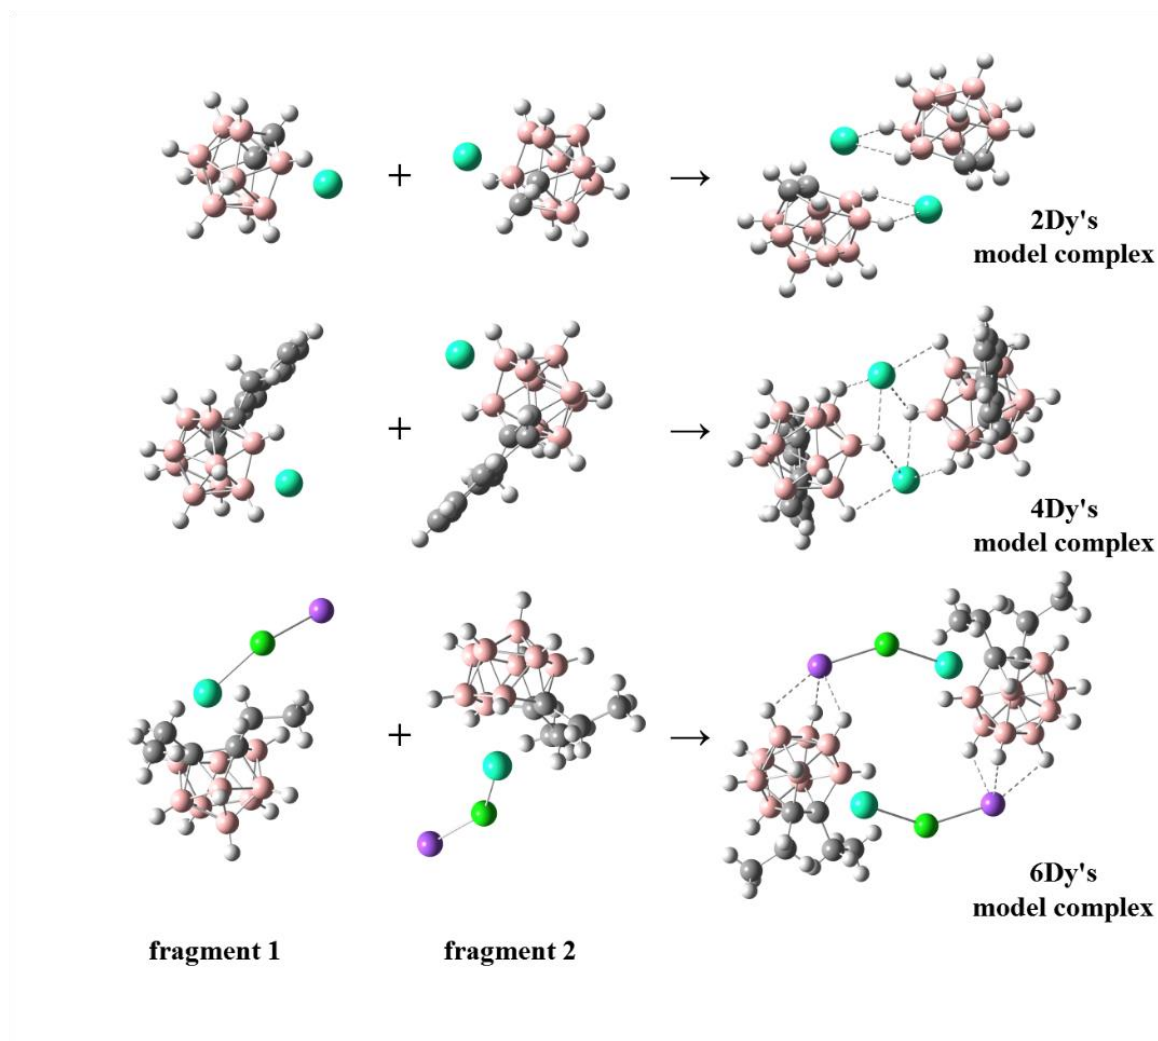

**Figure S77** The structure of the model complexes of 2Dy, 4Dy and 6Dy in DFT calculations to quantify the bonding energy between fragments. (cyan for Dy, pink for B, grey for C, green for Cl, purple for Na and white for H). Related to Figure 3.

**Table S31 Geometry coordinates of model compound for 2Dy in population analysis calculations. Related to Figure 3.**

|    |         |         |         |
|----|---------|---------|---------|
| Dy | -0.1078 | 1.6920  | 9.9410  |
| C  | -2.6152 | 2.5950  | 9.5018  |
| C  | -2.0000 | 3.3872  | 10.7043 |
| B  | -2.8093 | 1.0135  | 9.8727  |
| B  | -2.2875 | 0.8393  | 11.5419 |
| B  | -1.7172 | 2.4252  | 12.0025 |
| H  | -1.4251 | 4.1395  | 10.5575 |
| B  | -4.2382 | 2.0840  | 9.8177  |
| B  | -3.6696 | 3.6713  | 10.3374 |
| H  | -2.4168 | 2.9404  | 8.6824  |
| B  | -3.0959 | 3.5385  | 12.0087 |
| B  | -4.0193 | 0.9492  | 11.1812 |
| H  | -2.9042 | 0.2712  | 9.0697  |
| B  | -3.3398 | 1.8628  | 12.5386 |
| H  | -2.0614 | -0.0571 | 11.9638 |
| H  | -0.9280 | 2.5636  | 12.7566 |
| H  | -5.0456 | 1.9698  | 9.0819  |
| B  | -4.5416 | 2.6578  | 11.4685 |
| H  | -4.0984 | 4.6005  | 9.9338  |
| H  | -3.1543 | 4.3864  | 12.7077 |
| H  | -4.6936 | 0.0928  | 11.3320 |
| H  | -3.5798 | 1.6101  | 13.5821 |
| H  | -5.5519 | 2.9205  | 11.8130 |
| B  | 0.3678  | -1.0135 | 10.5086 |
| B  | -0.1540 | -0.8393 | 8.8394  |
| H  | 0.4627  | -0.2712 | 11.3116 |
| H  | -0.3801 | 0.0571  | 8.4175  |
| Dy | -2.3337 | -1.6920 | 10.4403 |
| C  | 0.1737  | -2.5950 | 10.8795 |
| B  | 1.7967  | -2.0840 | 10.5636 |
| B  | 1.5778  | -0.9492 | 9.2001  |
| B  | -0.7244 | -2.4252 | 8.3787  |
| B  | 0.8983  | -1.8628 | 7.8427  |
| C  | -0.4415 | -3.3872 | 9.6770  |
| H  | -1.0164 | -4.1395 | 9.8238  |
| B  | 1.2281  | -3.6713 | 10.0439 |
| H  | -0.0247 | -2.9404 | 11.6989 |
| H  | 2.6041  | -1.9698 | 11.2994 |
| B  | 2.1001  | -2.6578 | 8.9127  |
| H  | 2.2521  | -0.0928 | 9.0493  |
| H  | -1.5135 | -2.5636 | 7.6246  |
| B  | 0.6544  | -3.5385 | 8.3726  |
| H  | 1.1383  | -1.6101 | 6.7992  |
| H  | 1.6569  | -4.6005 | 10.4474 |
| H  | 3.1104  | -2.9205 | 8.5683  |
| H  | 0.7128  | -4.3864 | 7.6736  |

**Table S32 Geometry coordinates of fragment 1 for 2Dy in population analysis calculations.** Related to Figure 3.

|    |         |         |         |
|----|---------|---------|---------|
| Dy | -0.1078 | 1.6920  | 9.9410  |
| C  | -2.6152 | 2.5950  | 9.5018  |
| C  | -2.0000 | 3.3872  | 10.7043 |
| B  | -2.8093 | 1.0135  | 9.8727  |
| B  | -2.2875 | 0.8393  | 11.5419 |
| B  | -1.7172 | 2.4252  | 12.0025 |
| H  | -1.4251 | 4.1395  | 10.5575 |
| B  | -4.2382 | 2.0840  | 9.8177  |
| B  | -3.6696 | 3.6713  | 10.3374 |
| H  | -2.4168 | 2.9404  | 8.6824  |
| B  | -3.0959 | 3.5385  | 12.0087 |
| B  | -4.0193 | 0.9492  | 11.1812 |
| H  | -2.9042 | 0.2712  | 9.0697  |
| B  | -3.3398 | 1.8628  | 12.5386 |
| H  | -2.0614 | -0.0571 | 11.9638 |
| H  | -0.9280 | 2.5636  | 12.7566 |
| H  | -5.0456 | 1.9698  | 9.0819  |
| B  | -4.5416 | 2.6578  | 11.4685 |
| H  | -4.0984 | 4.6005  | 9.9338  |
| H  | -3.1543 | 4.3864  | 12.7077 |
| H  | -4.6936 | 0.0928  | 11.3320 |
| H  | -3.5798 | 1.6101  | 13.5821 |
| H  | -5.5519 | 2.9205  | 11.8130 |

**Table S33 Geometry coordinates of fragment 2 for 2Dy in population analysis calculations.** Related to Figure 3.

|    |         |         |         |
|----|---------|---------|---------|
| B  | 0.3678  | -1.0135 | 10.5086 |
| B  | -0.1540 | -0.8393 | 8.8394  |
| H  | 0.4627  | -0.2712 | 11.3116 |
| H  | -0.3801 | 0.0571  | 8.4175  |
| Dy | -2.3337 | -1.6920 | 10.4403 |
| C  | 0.1737  | -2.5950 | 10.8795 |
| B  | 1.7967  | -2.0840 | 10.5636 |
| B  | 1.5778  | -0.9492 | 9.2001  |
| B  | -0.7244 | -2.4252 | 8.3787  |
| B  | 0.8983  | -1.8628 | 7.8427  |
| C  | -0.4415 | -3.3872 | 9.6770  |
| H  | -1.0164 | -4.1395 | 9.8238  |
| B  | 1.2281  | -3.6713 | 10.0439 |
| H  | -0.0247 | -2.9404 | 11.6989 |
| H  | 2.6041  | -1.9698 | 11.2994 |
| B  | 2.1001  | -2.6578 | 8.9127  |
| H  | 2.2521  | -0.0928 | 9.0493  |
| H  | -1.5135 | -2.5636 | 7.6246  |
| B  | 0.6544  | -3.5385 | 8.3726  |
| H  | 1.1383  | -1.6101 | 6.7992  |
| H  | 1.6569  | -4.6005 | 10.4474 |
| H  | 3.1104  | -2.9205 | 8.5683  |
| H  | 0.7128  | -4.3864 | 7.6736  |

**Table S34 Geometry coordinates of model compound for 4Dy in population analysis calculations.** Related to Figure 3.

|    |          |          |          |
|----|----------|----------|----------|
| Dy | 7.88906  | 7.22636  | 1.65443  |
| Dy | 9.87078  | 5.66319  | -1.65443 |
| B  | 7.55895  | 6.83087  | -1.10201 |
| B  | 7.63472  | 6.82152  | -2.83556 |
| B  | 10.20089 | 6.05868  | 1.10201  |
| B  | 10.0116  | 4.36452  | 0.72501  |
| B  | 11.63183 | 5.15704  | 0.59892  |
| B  | 7.74824  | 8.52503  | -0.72501 |
| B  | 6.12801  | 7.73251  | -0.59892 |
| B  | 10.12512 | 6.06803  | 2.83556  |
| B  | 11.71396 | 6.28798  | 2.00007  |
| B  | 11.61944 | 5.31094  | 3.46427  |
| B  | 6.23815  | 9.36925  | -1.23724 |
| B  | 6.04588  | 6.60156  | -2.00007 |
| B  | 11.50042 | 3.61846  | 2.98671  |
| B  | 12.54861 | 4.70154  | 2.07415  |
| B  | 6.25942  | 9.27109  | -2.98671 |
| B  | 5.21123  | 8.18801  | -2.07415 |
| B  | 11.52169 | 3.52029  | 1.23724  |
| B  | 6.1404   | 7.5786   | -3.46427 |
| C  | 10.07895 | 4.52637  | 3.32857  |
| C  | 7.74612  | 9.34268  | -2.11261 |
| C  | 10.01372 | 3.54687  | 2.11261  |
| C  | 9.3674   | 4.10346  | 4.61482  |
| C  | 7.68089  | 8.36318  | -3.32857 |
| C  | 8.49837  | 10.64643 | -2.28062 |
| C  | 9.26146  | 2.24312  | 2.28062  |
| C  | 8.24413  | 3.11309  | 4.43215  |
| C  | 8.39244  | 8.78608  | -4.61482 |
| C  | 9.55453  | 10.64991 | -3.34449 |
| C  | 8.20531  | 2.23963  | 3.34449  |
| C  | 7.25065  | 3.0108   | 5.41391  |
| C  | 9.51571  | 9.77645  | -4.43215 |
| C  | 10.59292 | 11.59766 | -3.26883 |
| C  | 7.16692  | 1.29188  | 3.26883  |
| C  | 6.25142  | 2.06376  | 5.33037  |
| C  | 10.50919 | 9.87874  | -5.41391 |
| C  | 11.54745 | 11.68857 | -4.24759 |
| C  | 6.21239  | 1.20098  | 4.24759  |
| C  | 11.50842 | 10.82578 | -5.33037 |
| H  | 9.98832  | 6.93218  | 0.49647  |
| H  | 7.77152  | 5.95737  | -0.49647 |
| H  | 5.68962  | 7.55743  | 0.40979  |
| H  | 8.16371  | 8.97078  | 0.1718   |
| H  | 9.70857  | 6.90236  | 3.44063  |
| H  | 12.07022 | 5.33211  | -0.40979 |
| H  | 9.59613  | 3.91876  | -0.1718  |
| H  | 8.05127  | 5.98718  | -3.44063 |

|   |          |          |          |
|---|----------|----------|----------|
| H | 12.27221 | 7.23516  | 1.97958  |
| H | 12.11071 | 5.62518  | 4.39575  |
| H | 5.80586  | 10.22794 | -0.70452 |
| H | 5.48763  | 5.65439  | -1.97958 |
| H | 10.02258 | 3.71553  | 5.21532  |
| H | 9.01118  | 4.89655  | 5.04352  |
| H | 11.90907 | 2.81088  | 3.61242  |
| H | 13.6452  | 4.61891  | 2.08991  |
| H | 8.91671  | 10.87067 | -1.43425 |
| H | 7.85757  | 11.34577 | -2.48236 |
| H | 5.85076  | 10.07866 | -3.61242 |
| H | 4.11464  | 8.27064  | -2.08991 |
| H | 11.95398 | 2.6616   | 0.70452  |
| H | 5.64913  | 7.26436  | -4.39575 |
| H | 8.84313  | 2.01888  | 1.43425  |
| H | 9.90227  | 1.54377  | 2.48236  |
| H | 7.73726  | 9.17401  | -5.21532 |
| H | 8.74866  | 7.99299  | -5.04352 |
| H | 7.26515  | 3.59482  | 6.13891  |
| H | 10.63081 | 12.17417 | -2.54067 |
| H | 7.12903  | 0.71537  | 2.54067  |
| H | 5.60782  | 2.00431  | 5.99864  |
| H | 10.49469 | 9.29473  | -6.13891 |
| H | 12.22045 | 12.32734 | -4.18455 |
| H | 5.53939  | 0.56221  | 4.18455  |
| H | 12.15202 | 10.88523 | -5.99864 |

**Table S35 Geometry coordinates of fragment 1 for 4Dy in population analysis calculations.** Related to Figure 3.

|    |          |          |          |
|----|----------|----------|----------|
| Dy | 7.88906  | 7.22636  | 1.65443  |
| B  | 7.55895  | 6.83087  | -1.10201 |
| B  | 7.63472  | 6.82152  | -2.83556 |
| B  | 7.74824  | 8.52503  | -0.72501 |
| B  | 6.12801  | 7.73251  | -0.59892 |
| B  | 6.23815  | 9.36925  | -1.23724 |
| B  | 6.04588  | 6.60156  | -2.00007 |
| B  | 6.25942  | 9.27109  | -2.98671 |
| B  | 5.21123  | 8.18801  | -2.07415 |
| B  | 6.1404   | 7.5786   | -3.46427 |
| C  | 7.74612  | 9.34268  | -2.11261 |
| C  | 7.68089  | 8.36318  | -3.32857 |
| C  | 8.49837  | 10.64643 | -2.28062 |
| C  | 8.39244  | 8.78608  | -4.61482 |
| C  | 9.55453  | 10.64991 | -3.34449 |
| C  | 9.51571  | 9.77645  | -4.43215 |
| C  | 10.59292 | 11.59766 | -3.26883 |
| C  | 10.50919 | 9.87874  | -5.41391 |
| C  | 11.54745 | 11.68857 | -4.24759 |
| C  | 11.50842 | 10.82578 | -5.33037 |
| H  | 7.77152  | 5.95737  | -0.49647 |
| H  | 5.68962  | 7.55743  | 0.40979  |

|   |          |          |          |
|---|----------|----------|----------|
| H | 8.16371  | 8.97078  | 0.1718   |
| H | 8.05127  | 5.98718  | -3.44063 |
| H | 5.80586  | 10.22794 | -0.70452 |
| H | 5.48763  | 5.65439  | -1.97958 |
| H | 8.91671  | 10.87067 | -1.43425 |
| H | 7.85757  | 11.34577 | -2.48236 |
| H | 5.85076  | 10.07866 | -3.61242 |
| H | 4.11464  | 8.27064  | -2.08991 |
| H | 5.64913  | 7.26436  | -4.39575 |
| H | 7.73726  | 9.17401  | -5.21532 |
| H | 8.74866  | 7.99299  | -5.04352 |
| H | 10.63081 | 12.17417 | -2.54067 |
| H | 10.49469 | 9.29473  | -6.13891 |
| H | 12.22045 | 12.32734 | -4.18455 |
| H | 12.15202 | 10.88523 | -5.99864 |

**Table S36 Geometry coordinates of fragment 2 for 4Dy in population analysis calculations. Related to Figure 3.**

|    |          |         |          |
|----|----------|---------|----------|
| Dy | 9.87078  | 5.66319 | -1.65443 |
| B  | 10.20089 | 6.05868 | 1.10201  |
| B  | 10.0116  | 4.36452 | 0.72501  |
| B  | 11.63183 | 5.15704 | 0.59892  |
| B  | 10.12512 | 6.06803 | 2.83556  |
| B  | 11.71396 | 6.28798 | 2.00007  |
| B  | 11.61944 | 5.31094 | 3.46427  |
| B  | 11.50042 | 3.61846 | 2.98671  |
| B  | 12.54861 | 4.70154 | 2.07415  |
| B  | 11.52169 | 3.52029 | 1.23724  |
| C  | 10.07895 | 4.52637 | 3.32857  |
| C  | 10.01372 | 3.54687 | 2.11261  |
| C  | 9.3674   | 4.10346 | 4.61482  |
| C  | 9.26146  | 2.24312 | 2.28062  |
| C  | 8.24413  | 3.11309 | 4.43215  |
| C  | 8.20531  | 2.23963 | 3.34449  |
| C  | 7.25065  | 3.0108  | 5.41391  |
| C  | 7.16692  | 1.29188 | 3.26883  |
| C  | 6.25142  | 2.06376 | 5.33037  |
| C  | 6.21239  | 1.20098 | 4.24759  |
| H  | 9.98832  | 6.93218 | 0.49647  |
| H  | 9.70857  | 6.90236 | 3.44063  |
| H  | 12.07022 | 5.33211 | -0.40979 |
| H  | 9.59613  | 3.91876 | -0.1718  |
| H  | 12.27221 | 7.23516 | 1.97958  |
| H  | 12.11071 | 5.62518 | 4.39575  |
| H  | 10.02258 | 3.71553 | 5.21532  |
| H  | 9.01118  | 4.89655 | 5.04352  |
| H  | 11.90907 | 2.81088 | 3.61242  |
| H  | 13.6452  | 4.61891 | 2.08991  |
| H  | 11.95398 | 2.6616  | 0.70452  |
| H  | 8.84313  | 2.01888 | 1.43425  |
| H  | 9.90227  | 1.54377 | 2.48236  |

|   |         |         |         |
|---|---------|---------|---------|
| H | 7.26515 | 3.59482 | 6.13891 |
| H | 7.12903 | 0.71537 | 2.54067 |
| H | 5.60782 | 2.00431 | 5.99864 |
| H | 5.53939 | 0.56221 | 4.18455 |

**Table S37 Geometry coordinates of model compound for 6Dy in population analysis calculations. Related to Figure 3.**

|    |        |         |         |
|----|--------|---------|---------|
| Dy | 5.3342 | 5.3451  | 3.1506  |
| Cl | 5.7674 | 7.9348  | 3.198   |
| C  | 3.0475 | 3.8672  | 3.2816  |
| C  | 2.6768 | 5.3177  | 2.662   |
| B  | 4.1741 | 3.1108  | 2.2816  |
| B  | 4.4649 | 4.1551  | 0.9002  |
| B  | 3.4958 | 5.5871  | 1.2472  |
| Na | 6.8276 | 10.0984 | 1.8975  |
| C  | 3.0813 | 3.6593  | 4.8055  |
| B  | 2.4499 | 2.5868  | 2.2737  |
| B  | 1.4858 | 4.0618  | 2.5339  |
| C  | 2.334  | 6.4432  | 3.6739  |
| B  | 1.7637 | 5.1635  | 1.1901  |
| H  | 4.9264 | 2.3994  | 2.654   |
| B  | 3.3262 | 2.7765  | 0.722   |
| Na | 4.6423 | 3.304   | -1.8976 |
| B  | 2.894  | 4.4018  | 0.0501  |
| H  | 5.4028 | 4.0123  | 0.2392  |
| H  | 3.7825 | 6.5935  | 0.9038  |
| B  | 7.0043 | 9.2473  | -0.9003 |
| B  | 8.1431 | 10.6258 | -0.7216 |
| B  | 8.5753 | 9.0005  | -0.0498 |
| H  | 6.0665 | 9.39    | -0.2389 |
| H  | 8.5636 | 8.7879  | 0.993   |
| H  | 3.7987 | 3.0389  | 5.0013  |
| H  | 3.3189 | 4.5082  | 5.2113  |
| C  | 1.8348 | 3.1529  | 5.506   |
| H  | 2.1242 | 1.6009  | 2.6388  |
| B  | 1.6394 | 3.4173  | 0.9063  |
| H  | 0.5268 | 4.0426  | 3.0756  |
| H  | 1.6571 | 6.111   | 4.2835  |
| H  | 3.127  | 6.6391  | 4.1967  |
| C  | 1.8281 | 7.7439  | 3.0515  |
| H  | 0.9865 | 5.8634  | 0.8457  |
| H  | 3.6256 | 1.8541  | 0.0861  |
| Cl | 5.7017 | 5.4676  | -3.1981 |
| H  | 2.9051 | 4.6143  | -0.9923 |
| Dy | 6.1349 | 8.0573  | -3.1506 |
| B  | 7.2955 | 10.2918 | -2.2823 |
| B  | 7.9738 | 7.8155  | -1.2479 |
| B  | 9.0199 | 10.8156 | -2.274  |
| B  | 9.8299 | 9.985   | -0.9062 |
| H  | 7.8437 | 11.5482 | -0.0859 |
| B  | 9.7061 | 8.239   | -1.1904 |

|   |         |         |         |
|---|---------|---------|---------|
| H | 1.5439  | 2.3373  | 5.0916  |
| H | 1.1399  | 3.811   | 5.4385  |
| H | 2.0322  | 2.9884  | 6.4301  |
| H | 0.7856  | 2.9696  | 0.3759  |
| H | 2.5043  | 8.105   | 2.472   |
| H | 1.6306  | 8.3754  | 3.7458  |
| H | 1.0339  | 7.5673  | 2.542   |
| C | 8.4215  | 9.5353  | -3.2819 |
| C | 8.7923  | 8.0847  | -2.6622 |
| H | 6.5428  | 11.0029 | -2.6539 |
| H | 7.6867  | 6.8088  | -0.9037 |
| H | 9.3445  | 11.8013 | -2.6382 |
| B | 9.9834  | 9.3405  | -2.5337 |
| H | 10.6836 | 10.4326 | -0.376  |
| H | 10.4822 | 7.5388  | -0.8451 |
| C | 8.3884  | 9.7431  | -4.806  |
| C | 9.1357  | 6.9593  | -3.6743 |
| H | 10.9423 | 9.3596  | -3.0756 |
| H | 7.6706  | 10.3632 | -5.0009 |
| H | 8.1505  | 8.8939  | -5.211  |
| C | 9.6346  | 10.2492 | -5.5056 |
| H | 9.8123  | 7.2912  | -4.2831 |
| H | 8.3424  | 6.763   | -4.1964 |
| C | 9.6412  | 5.6583  | -3.0511 |
| H | 9.9253  | 11.0649 | -5.0914 |
| H | 10.3294 | 9.5912  | -5.4383 |
| H | 9.4371  | 10.4138 | -6.4299 |
| H | 8.965   | 5.2972  | -2.4718 |
| H | 9.8386  | 5.0268  | -3.7456 |
| H | 10.4354 | 5.8348  | -2.5418 |

**Table S38 Geometry coordinates of fragment 1 for 6Dy in population analysis calculations. Related to Figure 3.**

|    |        |         |         |
|----|--------|---------|---------|
| Na | 4.6423 | 3.3040  | -1.8976 |
| B  | 7.0043 | 9.2473  | -0.9003 |
| B  | 8.1431 | 10.6258 | -0.7216 |
| B  | 8.5753 | 9.0005  | -0.0498 |
| H  | 6.0665 | 9.3900  | -0.2389 |
| H  | 8.5636 | 8.7879  | 0.9930  |
| Cl | 5.7017 | 5.4676  | -3.1981 |
| Dy | 6.1349 | 8.0573  | -3.1506 |
| B  | 7.2955 | 10.2918 | -2.2823 |
| B  | 7.9738 | 7.8155  | -1.2479 |
| B  | 9.0199 | 10.8156 | -2.2740 |
| B  | 9.8299 | 9.9850  | -0.9062 |
| H  | 7.8437 | 11.5482 | -0.0859 |
| B  | 9.7061 | 8.2390  | -1.1904 |
| C  | 8.4215 | 9.5353  | -3.2819 |
| C  | 8.7923 | 8.0847  | -2.6622 |
| H  | 6.5428 | 11.0029 | -2.6539 |
| H  | 7.6867 | 6.8088  | -0.9037 |



|   |         |         |         |
|---|---------|---------|---------|
| H | 9.3445  | 11.8013 | -2.6382 |
| B | 9.9834  | 9.3405  | -2.5337 |
| H | 10.6836 | 10.4326 | -0.3760 |
| H | 10.4822 | 7.5388  | -0.8451 |
| C | 8.3884  | 9.7431  | -4.8060 |
| C | 9.1357  | 6.9593  | -3.6743 |
| H | 10.9423 | 9.3596  | -3.0756 |
| H | 7.6706  | 10.3632 | -5.0009 |
| H | 8.1505  | 8.8939  | -5.2110 |
| C | 9.6346  | 10.2492 | -5.5056 |
| H | 9.8123  | 7.2912  | -4.2831 |
| H | 8.3424  | 6.7630  | -4.1964 |
| C | 9.6412  | 5.6583  | -3.0511 |
| H | 9.9253  | 11.0649 | -5.0914 |
| H | 10.3294 | 9.5912  | -5.4383 |
| H | 9.4371  | 10.4138 | -6.4299 |
| H | 8.9650  | 5.2972  | -2.4718 |
| H | 9.8386  | 5.0268  | -3.7456 |
| H | 10.4354 | 5.8348  | -2.5418 |

**Table S39 Geometry coordinates of fragment 2 for 6Dy in population analysis calculations.** Related to Figure 3.

|    |        |         |         |
|----|--------|---------|---------|
| Dy | 5.3342 | 5.3451  | 3.1506  |
| Cl | 5.7674 | 7.9348  | 3.198   |
| C  | 3.0475 | 3.8672  | 3.2816  |
| C  | 2.6768 | 5.3177  | 2.662   |
| B  | 4.1741 | 3.1108  | 2.2816  |
| B  | 4.4649 | 4.1551  | 0.9002  |
| B  | 3.4958 | 5.5871  | 1.2472  |
| Na | 6.8276 | 10.0984 | 1.8975  |
| C  | 3.0813 | 3.6593  | 4.8055  |
| B  | 2.4499 | 2.5868  | 2.2737  |
| B  | 1.4858 | 4.0618  | 2.5339  |
| C  | 2.334  | 6.4432  | 3.6739  |
| B  | 1.7637 | 5.1635  | 1.1901  |
| H  | 4.9264 | 2.3994  | 2.654   |
| B  | 3.3262 | 2.7765  | 0.722   |
| B  | 2.894  | 4.4018  | 0.0501  |
| H  | 5.4028 | 4.0123  | 0.2392  |
| H  | 3.7825 | 6.5935  | 0.9038  |
| H  | 3.7987 | 3.0389  | 5.0013  |
| H  | 3.3189 | 4.5082  | 5.2113  |
| C  | 1.8348 | 3.1529  | 5.506   |
| H  | 2.1242 | 1.6009  | 2.6388  |
| B  | 1.6394 | 3.4173  | 0.9063  |
| H  | 0.5268 | 4.0426  | 3.0756  |
| H  | 1.6571 | 6.111   | 4.2835  |
| H  | 3.127  | 6.6391  | 4.1967  |
| C  | 1.8281 | 7.7439  | 3.0515  |
| H  | 0.9865 | 5.8634  | 0.8457  |
| H  | 3.6256 | 1.8541  | 0.0861  |
| H  | 2.9051 | 4.6143  | -0.9923 |
| H  | 1.5439 | 2.3373  | 5.0916  |

|   |        |        |        |
|---|--------|--------|--------|
| H | 1.1399 | 3.811  | 5.4385 |
| H | 2.0322 | 2.9884 | 6.4301 |
| H | 0.7856 | 2.9696 | 0.3759 |
| H | 2.5043 | 8.105  | 2.472  |
| H | 1.6306 | 8.3754 | 3.7458 |
| H | 1.0339 | 7.5673 | 2.542  |

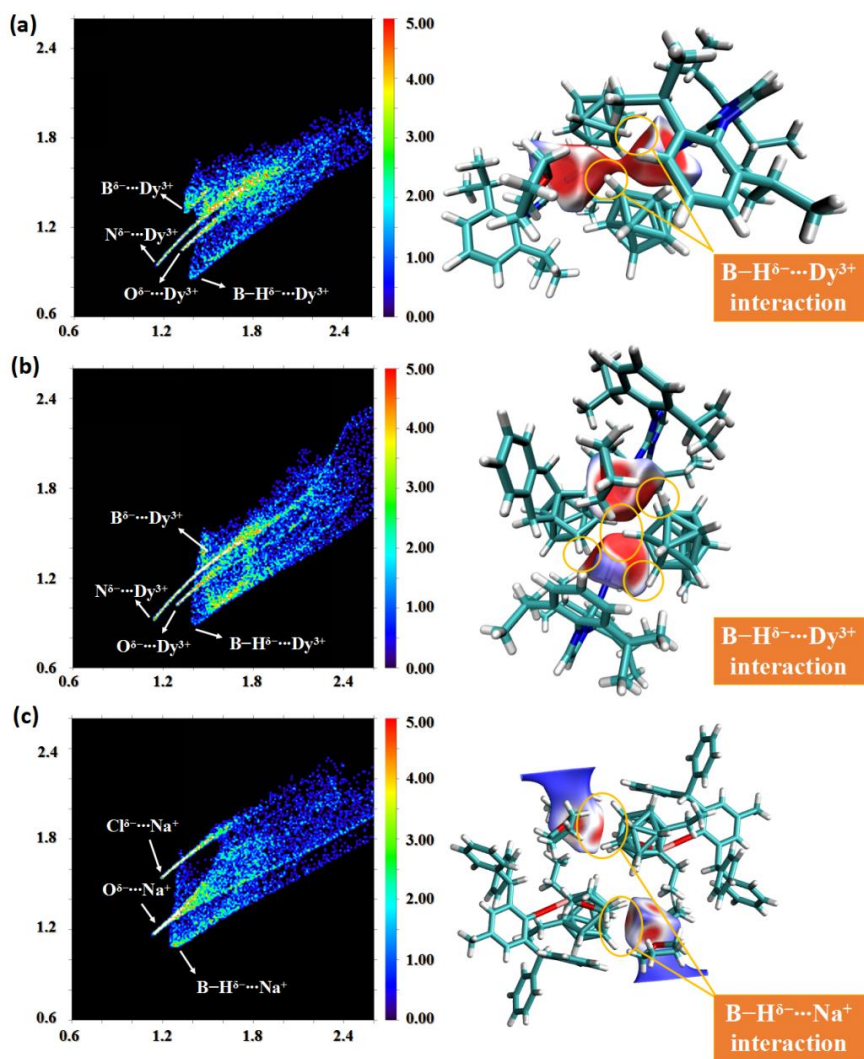

**Figure S78** Fingerprint plot (left) and color-mapped isosurface graph of Hirshfeld surface(right) for 2Dy (a), 4Dy (b) and 6Dy (c) respectively. Related to Figure 4.

**Table S40 Total electron density at bond critical points (BCPs) (a.u.)<sup>a</sup> Related to Figure 4.**

|            | <b>1</b> | <b>2</b> | <b>3</b> | <b>4</b> | <b>5</b> | $\rho_{\text{avg}}$ |
|------------|----------|----------|----------|----------|----------|---------------------|
| <b>2Dy</b> | 0.03469  | 0.02538  | 0.02521  | 0.03478  | /        | 0.0300              |
| <b>4Dy</b> | 0.03207  | 0.03541  | 0.03528  | 0.01337  | 0.03214  | 0.0297              |
| <b>6Dy</b> | 0.01048  | 0.01002  | 0.01003  | 0.01050  | /        | 0.0103              |

<sup>a</sup> Noted: Due to the dense B-H distribution on the surface of the carborane ligand, the BCP is affected by surrounding interactions, which makes the location of BCP not happen to appear on the B-H<sup>δ-</sup> and M<sup>n+</sup> lines, but slightly deviates or merges in one place, leading to the fact that the number of BCPs is less than actual amount of B-H<sup>δ-}</sup>...M<sup>n+</sup> in single crystal structure.
